# Supplementary material for: Structural Properties of Gas-Phase Molybdenum Oxide Clusters [Mo4O13]2−, [HMo4O13]−, and [CH3Mo4O13]− Studied by Collision-Induced Dissociation
Source: PubMed Central journal article supplement (PMC6805806; doi:10.1007/s13361-019-02294-4), 2019-08-16
Supplement: 13361_2019_2294_MOESM1_ESM.pdf [file 13361_2019_2294_MOESM1_ESM.pdf]

# Supporting Information

## Structural Properties of Gas Phase Molybdenum Oxide Clusters $[\text{Mo}_4\text{O}_{13}]^{2-}$ , $[\text{HMo}_4\text{O}_{13}]^-$ , and $[\text{CH}_3\text{Mo}_4\text{O}_{13}]^-$ Studied by Collision-Induced Dissociation

*Manuel Plattner, Aristeidis Baloglou, Milan Ončák, Christian van der Linde, and Martin K. Beyer\**

*Institut für Ionenphysik und Angewandte Physik, Universität Innsbruck, Technikerstraße 25, 6020 Innsbruck, Austria*

\* E-mail: [martin.beyer@uibk.ac.at](mailto:martin.beyer@uibk.ac.at)

### Mass spectra of natural and isotopically enriched molybdate clusters

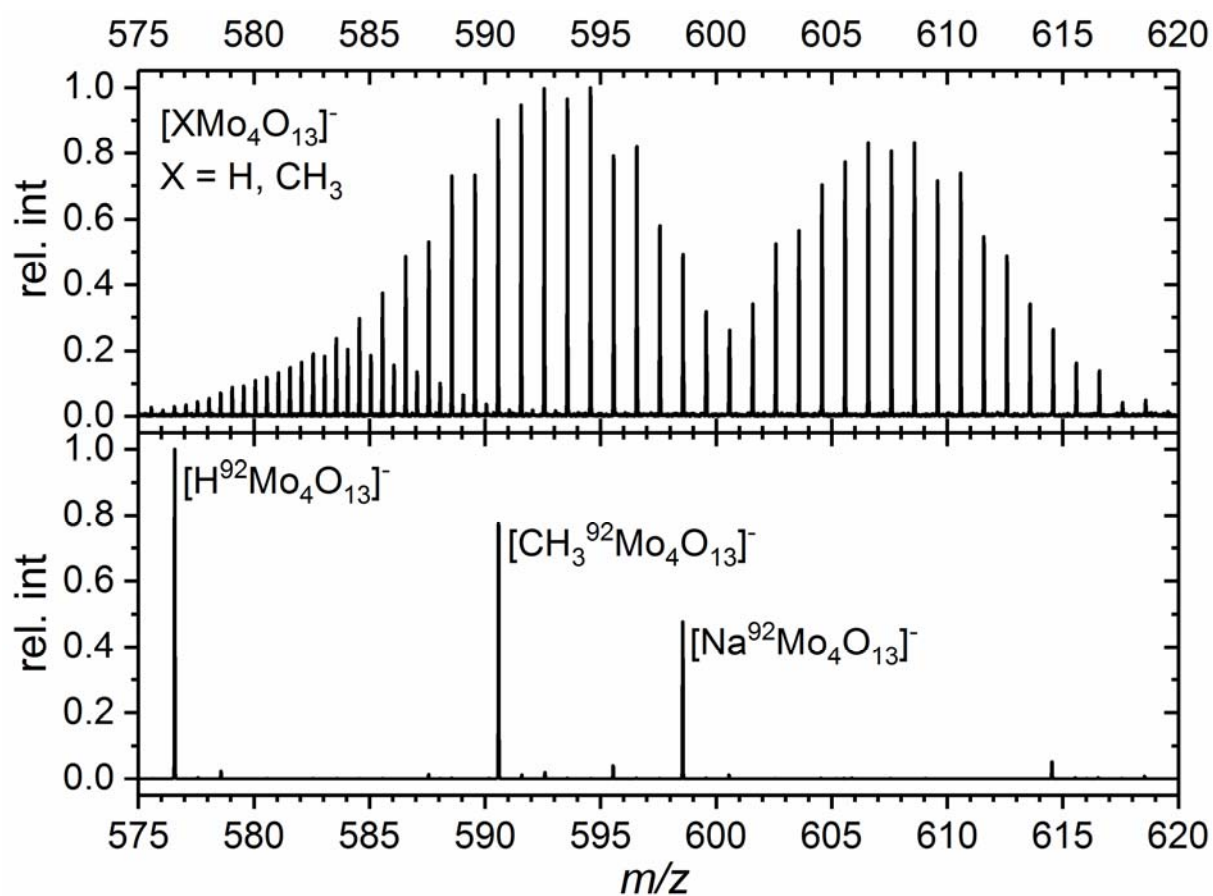

**Figure S1:** Isotopologues of natural tetramolybdate clusters (top) and the corresponding mass spectrum of the tetramolybdate clusters containing only isotopically enriched  $^{92}Mo$  (bottom). Unambiguous identification of the mass peaks is only possible for the isotopically enriched case. The doubly charged isotope distribution in the lower mass range is  $[Mo_8O_{25}]^{2-}$ . The mass peak  $[Na^{92}Mo_4O_{13}]^-$  is irrelevant for the present study and probably originates from  $Na^+$  impurities inside the ESI inlet system.

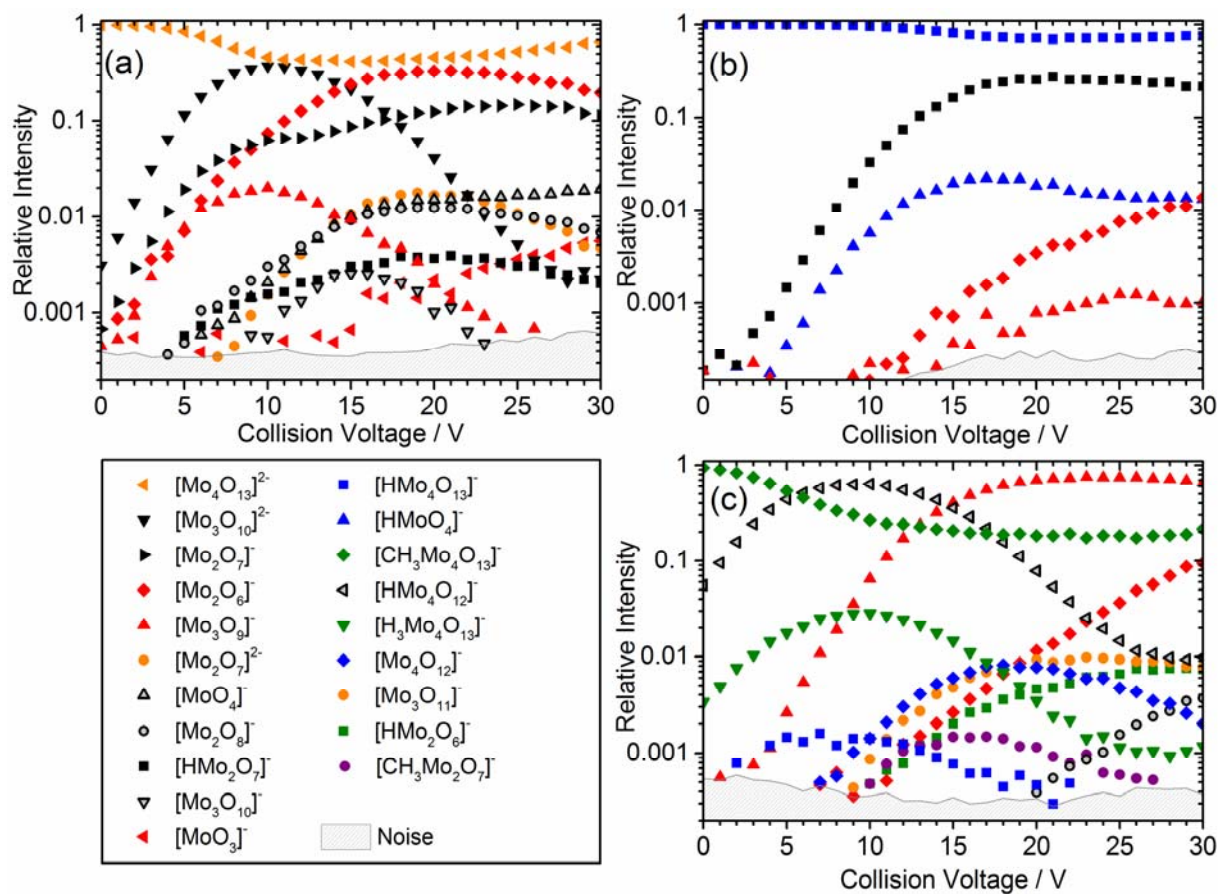

Figure S2: CID breakdown curves of the  $[\text{Mo}_4\text{O}_{13}]^{2-}$  (a),  $[\text{HMo}_4\text{O}_{13}]^-$  (b) and  $[\text{CH}_3\text{Mo}_4\text{O}_{13}]^-$  (c) clusters.

**Table S1:** Overview of all measured fragment ions, sorted by parent ion.

| [Mo <sub>4</sub> O <sub>13</sub> ] <sup>2-</sup><br>Fragment | Measured<br>m/z | Exact<br>m/z | [HMo <sub>4</sub> O <sub>13</sub> ] <sup>-</sup><br>Fragment | Measured<br>m/z | Exact<br>m/z | [CH <sub>3</sub> Mo <sub>4</sub> O <sub>13</sub> ] <sup>-</sup><br>Fragment | Measured<br>m/z | Exact<br>m/z |
|--------------------------------------------------------------|-----------------|--------------|--------------------------------------------------------------|-----------------|--------------|-----------------------------------------------------------------------------|-----------------|--------------|
| Mo <sub>4</sub> O <sub>13</sub> <sup>2-</sup>                | 287.780         | 287.781      | HMo <sub>4</sub> O <sub>13</sub> <sup>-</sup>                | 576.568         | 576.570      | CH <sub>3</sub> Mo <sub>4</sub> O <sub>13</sub> <sup>-</sup>                | 590.583         | 590.585      |
| Mo <sub>3</sub> O <sub>10</sub> <sup>2-</sup>                | 217.834         | 217.835      | HMo <sub>2</sub> O <sub>7</sub> <sup>-</sup>                 | 296.786         | 296.786      | HMo <sub>4</sub> O <sub>12</sub> <sup>-</sup>                               | 560.574         | 560.575      |
| Mo <sub>2</sub> O <sub>7</sub> <sup>-</sup>                  | 295.778         | 295.779      | HMoO <sub>4</sub> <sup>-</sup>                               | 156.892         | 156.894      | H <sub>3</sub> Mo <sub>4</sub> O <sub>13</sub> <sup>-</sup>                 | 578.584         | 578.585      |
| Mo <sub>2</sub> O <sub>6</sub> <sup>-</sup>                  | 279.783         | 279.784      | Mo <sub>2</sub> O <sub>6</sub> <sup>-</sup>                  | 279.782         | 279.784      | Mo <sub>4</sub> O <sub>12</sub> <sup>-</sup>                                | 559.566         | 559.567      |
| Mo <sub>3</sub> O <sub>9</sub> <sup>-</sup>                  | 419.675         | 419.675      | Mo <sub>3</sub> O <sub>9</sub> <sup>-</sup>                  | 419.675         | 419.675      | Mo <sub>3</sub> O <sub>11</sub> <sup>-</sup>                                | 451.665         | 451.665      |
| Mo <sub>2</sub> O <sub>7</sub> <sup>2-</sup>                 | 147.887         | 147.890      |                                                              |                 |              | Mo <sub>2</sub> O <sub>6</sub> <sup>-</sup>                                 | 279.783         | 279.784      |
| MoO <sub>4</sub> <sup>-</sup>                                | 155.885         | 155.887      |                                                              |                 |              | HMo <sub>2</sub> O <sub>6</sub> <sup>-</sup>                                | 280.791         | 280.791      |
| Mo <sub>2</sub> O <sub>8</sub> <sup>-</sup>                  | 311.773         | 311.773      |                                                              |                 |              | CH <sub>3</sub> Mo <sub>2</sub> O <sub>7</sub> <sup>-</sup>                 | 310.802         | 310.802      |
| HMo <sub>2</sub> O <sub>7</sub> <sup>-</sup>                 | 296.786         | 296.786      |                                                              |                 |              | Mo <sub>3</sub> O <sub>9</sub> <sup>-</sup>                                 | 419.675         | 419.675      |
| Mo <sub>3</sub> O <sub>10</sub> <sup>-</sup>                 | 435.670         | 435.670      |                                                              |                 |              | HMo <sub>4</sub> O <sub>13</sub> <sup>-</sup>                               | 576.569         | 576.570      |
| MoO <sub>3</sub> <sup>-</sup>                                | 139.889         | 139.892      |                                                              |                 |              | Mo <sub>2</sub> O <sub>8</sub> <sup>-</sup>                                 | 311.773         | 311.773      |

**Table S2:** Energies of calculated structures on the wB97XD level of theory. See Figures for the respective structures.

| Ion                                              | Isomer | Singlet/Douplet | Triplet/Quartet | Pentet/Hextet |
|--------------------------------------------------|--------|-----------------|-----------------|---------------|
| [HMo <sub>2</sub> O <sub>6</sub> ] <sup>-</sup>  | I      | 0.00            | -               | -             |
|                                                  | II     | 0.25            | 0.64            | -             |
|                                                  | III    | 0.67            | 0.71            | -             |
|                                                  | IV     | 2.25            | 0.71            | -             |
| [CH <sub>3</sub> OH]                             | I      | 0.00            | -               | -             |
| [Mo <sub>2</sub> O <sub>6</sub> ] <sup>-</sup>   | I      | 0.00            | 3.41            | -             |
| [Mo <sub>2</sub> O <sub>8</sub> ] <sup>-</sup>   | I      | 0.00            | 2.89            | -             |
|                                                  | II     | 2.62            | 2.60            | -             |
|                                                  | III    | 2.71            | 2.72            | -             |
| [CO <sub>2</sub> ]                               | I      | 0.00            | 4.49            | -             |
| [Mo <sub>4</sub> O <sub>13</sub> ] <sup>2-</sup> | I      | 0.00            | 2.47            | -             |
|                                                  | II     | 0.20            | 3.32            | -             |
|                                                  | III    | 0.47            | 3.25            | -             |
|                                                  | IV     | 2.75            | 2.75            | -             |
|                                                  | V      | 2.85            | 2.85            | -             |
|                                                  | VI     | 3.26            | 3.21            | -             |
|                                                  | VII    | 4.08            | 4.08            | -             |
|                                                  | VIII   | 4.21            | 4.31            | -             |
| [CH <sub>2</sub> O <sub>2</sub> ]                | I      | 0.00            | 1.51            | -             |
| [Mo <sub>2</sub> O <sub>8</sub> ] <sup>2-</sup>  | I      | 0.00            | 2.01            | -             |
|                                                  | II     | 2.12            | 2.12            | -             |
|                                                  | III    | 2.53            | -               | -             |
| [Mo <sub>2</sub> O <sub>6</sub> ] <sup>2-</sup>  | I      | 0.00            | 0.25            | -             |
| [HMo <sub>3</sub> O <sub>10</sub> ] <sup>-</sup> | I      | 0.00            | 2.95            | -             |
|                                                  | II     | 0.17            | 3.02            | -             |
|                                                  | III    | 0.50            | 3.07            | -             |
|                                                  | IV     | 0.77            | 2.91            | -             |
|                                                  | V      | 0.87            | -               | -             |
|                                                  | VI     | 1.18            | 3.61            | -             |
|                                                  | VII    | 1.20            | 3.92            | -             |

|                                                   |      |      |      |      |
|---------------------------------------------------|------|------|------|------|
| [Mo <sub>2</sub> O <sub>7</sub> ] <sup>2-</sup>   | I    | 0.00 | 3.39 | -    |
| [CH <sub>3</sub> O]                               | I    | 0.00 | -    | -    |
| [MoO <sub>4</sub> ] <sup>-</sup>                  | I    | 0.00 | 3.49 | -    |
|                                                   | II   | 3.49 | 3.89 | 7.33 |
| [HMoO <sub>4</sub> ] <sup>-</sup>                 | I    | 0.00 | 3.19 | -    |
|                                                   | II   | 5.02 | 5.41 | -    |
|                                                   | III  | 5.39 | 5.43 | -    |
|                                                   | IV   | 6.05 | -    | -    |
| [Mo <sub>2</sub> O <sub>5</sub> ] <sup>-</sup>    | I    | 0.00 | 0.02 | 3.13 |
| [HMo <sub>4</sub> O <sub>12</sub> ] <sup>-</sup>  | I    | 0.30 | 0.00 | -    |
|                                                   | II   | 1.22 | 0.10 | -    |
|                                                   | III  | 0.23 | 0.33 | -    |
|                                                   | IV   | 0.36 | 0.25 | -    |
|                                                   | V    | 0.35 | 0.35 | -    |
|                                                   | VI   | 0.39 | 2.28 | -    |
|                                                   | VII  | 1.75 | 1.25 | -    |
| [MoO <sub>3</sub> ] <sup>-</sup>                  | I    | 0.00 | 2.96 | 6.49 |
| [Mo <sub>3</sub> O <sub>10</sub> ] <sup>-</sup>   | I    | 0.00 | 2.76 | -    |
|                                                   | II   | 0.32 | 2.29 | -    |
|                                                   | III  | 0.45 | 3.05 | -    |
| [CH <sub>3</sub> Mo <sub>2</sub> O <sub>7</sub> ] | I    | 0.00 | 3.26 | -    |
| [CH <sub>2</sub> O]                               | I    | 0.00 | 2.92 | -    |
| [HMo <sub>4</sub> O <sub>13</sub> ] <sup>-</sup>  | I    | 0.00 | 3.14 | -    |
|                                                   | II   | 0.21 | 2.70 | -    |
|                                                   | III  | 0.35 | 3.51 | -    |
|                                                   | IV   | 0.42 | 3.73 | -    |
|                                                   | V    | 0.48 | 2.61 | -    |
|                                                   | VI   | 0.61 | 3.77 | -    |
|                                                   | VII  | 0.66 | 2.72 | -    |
|                                                   | VIII | 1.17 | 3.46 | -    |
|                                                   | IX   | 1.17 | 3.41 | -    |
|                                                   | X    | 1.31 | 2.95 | -    |
|                                                   | XI   | 1.40 | 3.74 | -    |
|                                                   | XII  | 1.73 | 4.20 | -    |
|                                                   | XIII | 1.40 | 3.74 | -    |
| [HMoO <sub>3</sub> ]                              | I    | 0.00 | 0.37 | -    |
| [HMo <sub>2</sub> O <sub>7</sub> ]                | I    | 0.00 | 5.44 | -    |

|                                                                 |       |      |      |      |
|-----------------------------------------------------------------|-------|------|------|------|
|                                                                 | II    | 0.69 | 2.91 | -    |
| [CH <sub>3</sub> Mo <sub>2</sub> O <sub>5</sub> ]               | I     | 0.00 | 2.23 | -    |
|                                                                 | II    | 1.19 | 1.28 | -    |
|                                                                 | III   | 1.52 | 1.32 | -    |
|                                                                 | IV    | 1.63 | 1.87 | -    |
|                                                                 | V     | 2.33 | 2.35 | -    |
| [Mo <sub>3</sub> O <sub>9</sub> ] <sup>-</sup>                  | I     | 0.00 | 3.30 | -    |
|                                                                 | II    | 0.27 | 3.45 | -    |
| [Mo <sub>2</sub> O <sub>6</sub> ]                               | I     | 0.00 | 2.71 | 5.57 |
| [HMo <sub>2</sub> O <sub>7</sub> ] <sup>-</sup>                 | I     | 0.00 | 2.73 | -    |
|                                                                 | II    | 0.92 | -    | -    |
| [HMoO <sub>4</sub> ]                                            | I     | 0.00 | 3.41 | -    |
|                                                                 | II    | 1.49 | 3.12 | -    |
|                                                                 | III   | 2.59 | 4.97 | -    |
|                                                                 | IV    | 3.25 | 4.64 | -    |
| [Mo <sub>2</sub> O <sub>7</sub> ] <sup>-</sup>                  | I     | 0.00 | 3.12 | -    |
| [O <sub>2</sub> ]                                               | I     | 0.50 | 0.00 | -    |
| [CH <sub>3</sub> Mo <sub>4</sub> O <sub>13</sub> ] <sup>-</sup> | I     | 0.00 | 2.66 | -    |
|                                                                 | II    | 0.18 | 2.55 | -    |
|                                                                 | III   | 0.23 | 2.48 | -    |
|                                                                 | IV    | 0.26 | 3.55 | -    |
|                                                                 | V     | 0.37 | 2.66 | -    |
|                                                                 | VI    | 0.45 | 2.66 | -    |
|                                                                 | VII   | 0.52 | 2.68 | -    |
|                                                                 | VIII  | 0.92 | -    | -    |
|                                                                 | IX    | 0.97 | 1.71 | -    |
|                                                                 | X     | 1.10 | -    | -    |
|                                                                 | XI    | 1.10 | -    | -    |
|                                                                 | XII   | 1.21 | -    | -    |
|                                                                 | XIII  | 1.22 | -    | -    |
|                                                                 | XIV   | 1.22 | -    | -    |
|                                                                 | XV    | 1.22 | -    | -    |
|                                                                 | XVI   | 1.45 | -    | -    |
|                                                                 | XVII  | 1.52 | -    | -    |
|                                                                 | XVIII | 1.52 | -    | -    |
|                                                                 | XIX   | 1.54 | 3.12 | -    |

|                                                  |         |      |      |   |
|--------------------------------------------------|---------|------|------|---|
|                                                  | XX      | 1.54 | -    | - |
|                                                  | XXI     | 1.65 | -    | - |
|                                                  | XXII    | 1.65 | -    | - |
|                                                  | XXIII   | 1.65 | -    | - |
|                                                  | XXIV    | 1.65 | -    | - |
|                                                  | XXV     | 1.66 | -    | - |
|                                                  | XXVI    | 1.67 | -    | - |
|                                                  | XXVII   | 1.72 | -    | - |
|                                                  | XXVIII  | 1.74 | -    | - |
|                                                  | XXIX    | 1.84 | -    | - |
|                                                  | XXX     | 1.95 | -    | - |
|                                                  | XXXI    | 2.05 | -    | - |
|                                                  | XXXII   | 2.19 | -    | - |
|                                                  | XXXIII  | 2.25 | -    | - |
|                                                  | XXXIV   | 2.31 | -    | - |
|                                                  | XXXV    | 2.35 | -    | - |
|                                                  | XXXVI   | 2.49 | -    | - |
|                                                  | XXXVII  | 2.57 | -    | - |
|                                                  | XXXVIII | 2.66 | -    | - |
|                                                  | XXXIX   | 2.66 | -    | - |
|                                                  | XL      | 2.76 | -    | - |
|                                                  | XLI     | 2.93 | -    | - |
| [H <sub>2</sub> O]                               | I       | 0.00 | -    | - |
| [CH <sub>3</sub> MoO <sub>2</sub> ]              | I       | 0.00 | 2.47 | - |
| [CH <sub>3</sub> MoO <sub>4</sub> ]              | I       | 0.00 | 3.23 | - |
|                                                  | II      | 1.49 | 3.17 | - |
|                                                  | III     | 1.62 | -    | - |
|                                                  | IV      | 2.45 | 4.76 | - |
| [Mo <sub>3</sub> O <sub>10</sub> ] <sup>2-</sup> | I       | 0.00 | 3.54 | - |
|                                                  | II      | 1.14 | 3.58 | - |
|                                                  | III     | 4.24 | 4.14 | - |
|                                                  | IV      | 4.98 | 4.81 | - |
| [Mo <sub>3</sub> O <sub>9</sub> ]                | I       | 0.00 | 3.08 | - |
|                                                  | II      | 1.38 | 3.61 | - |
| [Mo <sub>4</sub> O <sub>12</sub> ] <sup>-</sup>  | I       | 0.00 | 3.33 | - |



|                                                                |      |      |      |      |
|----------------------------------------------------------------|------|------|------|------|
|                                                                | II   | 0.36 | 3.47 | -    |
|                                                                | III  | 0.80 | 3.44 | -    |
|                                                                | IV   | 1.11 | -    | -    |
|                                                                | V    | 1.53 | 3.71 | -    |
| [CH <sub>2</sub> Mo <sub>2</sub> O <sub>7</sub> ]              | I    | 0.00 | 3.23 | -    |
| [H <sub>3</sub> Mo <sub>4</sub> O <sub>13</sub> ] <sup>-</sup> | I    | 0.01 | 0.00 | -    |
|                                                                | II   | 0.44 | 0.61 | -    |
|                                                                | III  | 0.55 | 0.54 | -    |
|                                                                | IV   | 0.59 | 0.59 | -    |
|                                                                | V    | 1.05 | 1.01 | -    |
|                                                                | VI   | 1.22 | 1.24 | -    |
|                                                                | VII  | 1.26 | 1.24 | -    |
|                                                                | VIII | 1.58 | 1.61 | -    |
|                                                                | IX   | 2.00 | 2.00 | -    |
|                                                                | X    | 2.04 | 2.03 | -    |
|                                                                | XI   | 2.32 | 2.32 | -    |
|                                                                | XII  | 2.59 | 2.57 | -    |
| [CH <sub>3</sub> Mo <sub>2</sub> O <sub>7</sub> ] <sup>-</sup> | I    | 0.00 | 3.16 | -    |
|                                                                | II   | 0.94 | 3.81 | -    |
| [H <sub>2</sub> ]                                              | I    | 0.00 | -    | -    |
| [MoO <sub>3</sub> ]                                            | I    | 0.00 | 1.70 | 4.41 |
| [Mo <sub>3</sub> O <sub>11</sub> ] <sup>-</sup>                | I    | 0.00 | -    | -    |
|                                                                | II   | 2.38 | 2.67 | -    |
| [Mo <sub>2</sub> O <sub>7</sub> ]                              | I    | 0.00 | 0.00 | -    |
|                                                                | II   | 0.71 | 0.67 | -    |
| [MoO <sub>4</sub> ]                                            | I    | 0.02 | 0.00 | -    |
| [Mo <sub>2</sub> O <sub>5</sub> ]                              | I    | 0.00 | 0.53 | 3.12 |

**Table S3:** Benchmarking various properties of small molybdenum oxide and sulfide clusters using different DFT functionals along with the def2TZVP basis set. Experimental values taken from Ref. [1–3].

| quantity                              | $\omega$ B97XD | B3LYP | M06  | exp.            |
|---------------------------------------|----------------|-------|------|-----------------|
| $D_0(\text{Mo}^+-\text{O})$           | 4.76           | 5.07  | 5.10 | $5.06 \pm 0.02$ |
| $D_0(\text{OMo}^+-\text{O})$          | 5.32           | 5.25  | 5.24 | $5.57 \pm 0.14$ |
| $\text{IE}(\text{MoO})$               | 7.38           | 7.57  | 7.48 | $7.79 \pm 0.22$ |
| $D_0(\text{Mo}^+-\text{S})$           | 3.43           | 3.73  | 3.75 | $3.68 \pm 0.06$ |
| $D_0(\text{SMo}^+-\text{S})$          | 3.89           | 3.87  | 4.35 | $4.10 \pm 0.10$ |
| $D_0(\text{Mo}^+-\text{S}_2)$         | 2.81           | 3.17  | 3.53 | $3.42 \pm 0.11$ |
| $D_0(\text{S}_2\text{Mo}^+-\text{S})$ | 3.45           | 3.48  | 3.71 | $3.37 \pm 0.09$ |
| $D_0(\text{SMo}^+-\text{S}_2)$        | 2.83           | 2.92  | 3.50 | $3.11 \pm 0.13$ |

## References

1. Sievers, M.R., Chen, Y.-M., Armentrout, P.B.: Metal oxide and carbide thermochemistry of  $Y^+$ ,  $Zr^+$ ,  $Nb^+$ , and  $Mo^+$ . *J. Chem. Phys.* **105**, 6322–6333 (1996)
2. Sievers, M.R., Armentrout, P.B.: Reactions of CO and CO<sub>2</sub> with Gas-Phase  $Mo^+$ ,  $MoO^+$ , and  $MoO_2^+$ . *J. Phys. Chem. A* **102**, 10754–10762 (1998)
3. Kretzschmar, I., Schröder, D., Schwarz, H., Armentrout, P.B.: Structure, Thermochemistry, and Reactivity of  $MS_n^+$  Cations ( $M=V, Mo$ ;  $n=1-3$ ) in the Gas Phase. *Int. J. Mass Spectrom.* **228**, 439–456 (2003)
4. Zhai, H.-J., Huang, X., Waters, T., Wang, X.-B., O'Hair, R.A.J., Wedd, A.G., Wang, L.-S.: Photoelectron spectroscopy of doubly and singly charged group VIB dimetalate anions:  $M_2O_7^{2-}$ ,  $MM'O_7^{2-}$ , and  $M_2O_7^-$  ( $M, M' = Cr, Mo, W$ ). *J. Phys. Chem. A* **109**, 10512–10520 (2005)
5. Zhai, H.-J., Kiran, B., Cui, L.-F., Li, X., Dixon, D.A., Wang, L.-S.: Electronic structure and chemical bonding in  $MO(n)$ - and  $MO(n)$  clusters ( $M = Mo, W$ ;  $n = 3-5$ ): a photoelectron spectroscopy and ab initio study. *J. Am. Chem. Soc.* **126**, 16134–16141 (2004)

**Table S4:** Benchmarking vertical detachment energies (in eV) for various molybdenum oxides using different DFT functionals along with the def2TZVP basis set. Experimental values are taken from [4, 5].

| Ion              | $\omega$ B97XD | B3LYP | M06  | exp.    |
|------------------|----------------|-------|------|---------|
| $[MoO_3]^-$      | 3.29           | 3.41  | 3.26 | 3.33(5) |
| $[MoO_4]^-$      | 5.49           | 5.37  | 5.44 | 5.45(5) |
| $[MoO_5]^-$      | 5.48           | 5.39  | 5.41 | 5.40(5) |
| $[Mo_2O_7]^-$    | 6.90           | 6.60  | 6.76 | ~ 6.5   |
| $[Mo_2O_7]^{2-}$ | 2.30           | 1.80  | 1.98 | ~ 2.2   |

### Calculated structures on the $\omega$ B97XD/def2TZVP level of theory

Zero-point corrected energies are given in eV relative to the most stable structure in

Figures S3.1-S3.43.

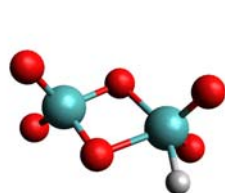

I E=0.00

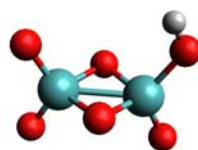

II E=0.25

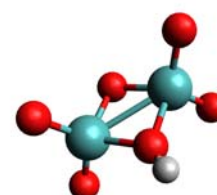

III E=0.67

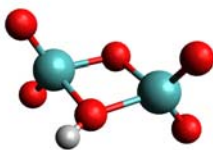

IV\* E=0.71

Figure S3.1: Calculated Molecules of  $[\text{HMo}_2\text{O}_6]^-$  in lowest multiplicity unless marked with \*.

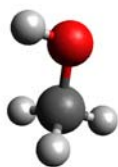

I E=0.00

Figure S3.2: Calculated Molecules of  $[\text{CH}_3\text{OH}]$  in lowest multiplicity unless marked with \*.

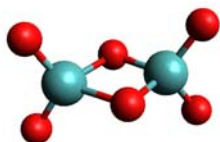

I E=0.00

Figure S3.S3.3: Calculated Molecules of  $[\text{Mo}_2\text{O}_6]^-$  in lowest multiplicity unless marked with \*.

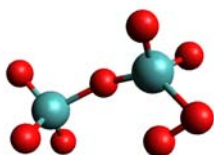

I E=0.00

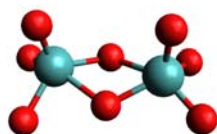

II\* E=2.60

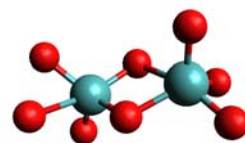

III E=2.71

Figure S3.4: Calculated Molecules of  $[\text{Mo}_2\text{O}_8]^-$  in lowest multiplicity unless marked with \*.

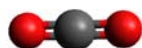

I E=0.00

Figure S3.5: Calculated Molecules of  $[\text{CO}_2]$  in lowest multiplicity unless marked with \*.

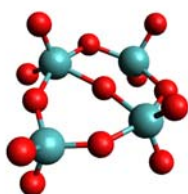

I E=0.00

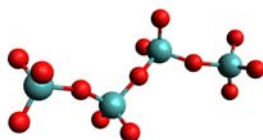

II E=0.20

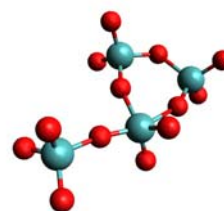

III E=0.47

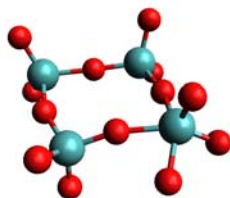

IV E=2.75

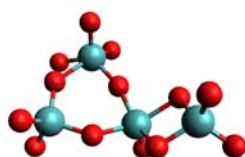

V E=2.85

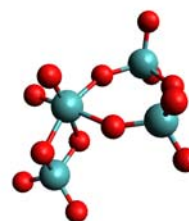

VI\* E=3.21

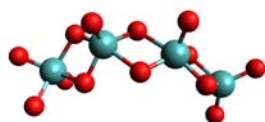

VII\* E=4.08

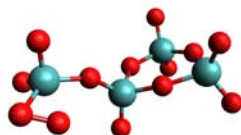

VIII E=4.21

Figure S3.6: Calculated Molecules of  $[\text{Mo}_4\text{O}_{13}]^{2-}$  in lowest multiplicity unless marked with \*.

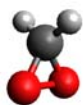

I E=0.00

Figure S3.7: Calculated Molecules of  $[\text{CH}_2\text{O}_2]$  in lowest multiplicity unless marked with \*.

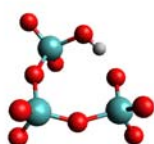

I E=0.00

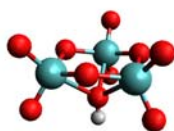

II E=0.17

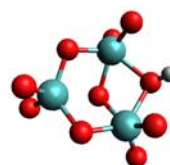

III E=0.50

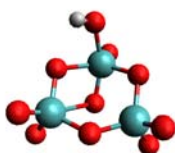

IV E=0.77

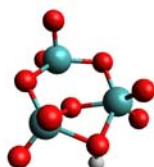

V E=0.87

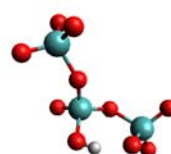

VI E=1.18

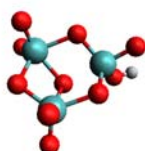

VII E=1.20

Figure S3.10: Calculated Molecules of  $[\text{HMo}_3\text{O}_{10}]^-$  in lowest multiplicity unless marked with \*.

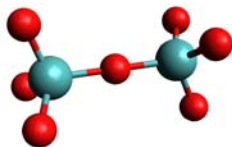

I E=0.00

Figure S3.11: Calculated Molecules of  $[\text{Mo}_2\text{O}_7]^{2-}$  in lowest multiplicity unless marked with \*.

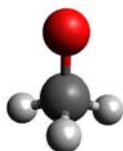

I E=0.00

Figure S3.12: Calculated Molecules of  $[\text{CH}_3\text{O}]$  in lowest multiplicity unless marked with \*.

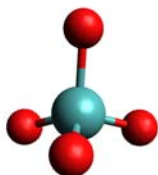

I E=0.00

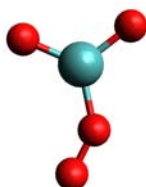

II E=3.49

Figure S3.13: Calculated Molecules of  $[\text{MoO}_4]^-$  in lowest multiplicity unless marked with \*.

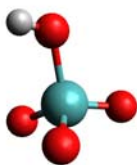

I E=0.00

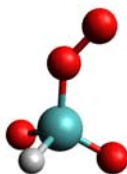

II E=5.02

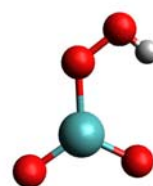

III E=5.39

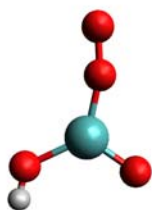

IV E=6.05

Figure S3.14: Calculated Molecules of  $[\text{HMoO}_4]^-$  in lowest multiplicity unless marked with \*.

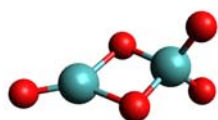

I E=0.00

Figure S3.16: Calculated Molecules of  $[\text{Mo}_2\text{O}_5]^{2-}$  in lowest multiplicity unless marked with \*.

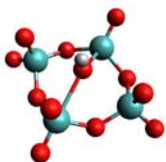

I\* E=0.00

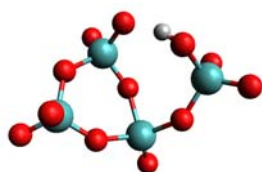

II\* E=0.10

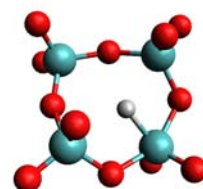

III E=0.23

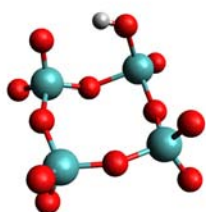

IV\* E=0.25

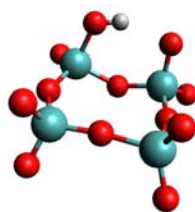

V E=0.35

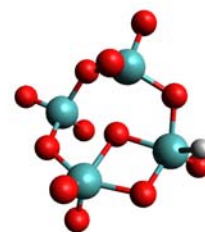

VI E=0.39

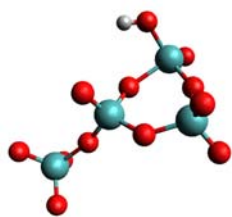

VII\* E=1.25

Figure S3.17: Calculated Molecules of  $[\text{HMo}_4\text{O}_{12}]^-$  in lowest multiplicity unless marked with \*.

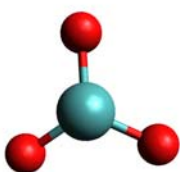

I E=0.00

Figure S3.18: Calculated Molecules of  $[\text{MoO}_3]^-$  in lowest multiplicity unless marked with \*.

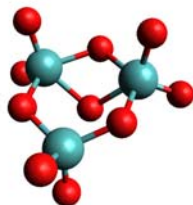

I E=0.00

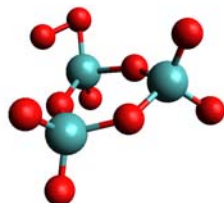

II E=0.32

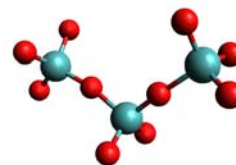

III E=0.45

Figure S3.19: Calculated Molecules of  $[\text{Mo}_3\text{O}_{10}]^-$  in lowest multiplicity unless marked with \*.

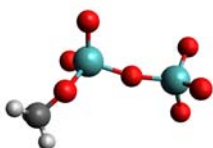

I E=0.00



Figure S3.20: Calculated Molecules of  $[\text{CH}_3\text{Mo}_2\text{O}_7]$  in lowest multiplicity unless marked with \*.

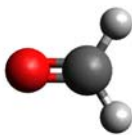

I E=0.00

Figure S3.21: Calculated Molecules of  $[\text{CH}_2\text{O}]$  in lowest multiplicity unless marked with \*.

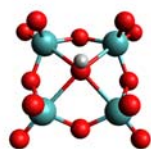

I E=0.00

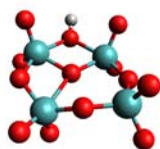

II E=0.21

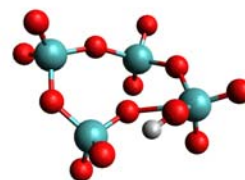

III E=0.35

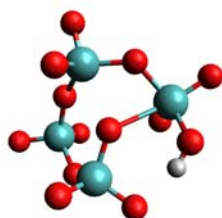

IV E=0.42

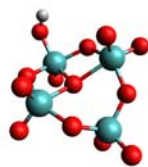

V E=0.48

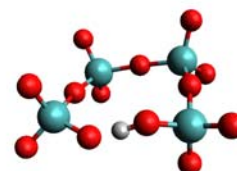

VI E=0.61

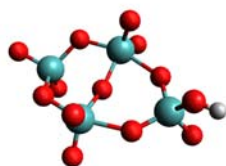

VII E=0.66

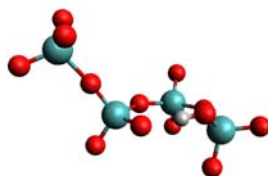

VIII E=1.17

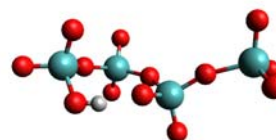

IX E=1.17

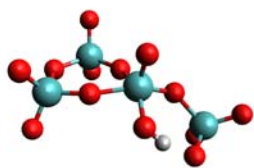

X E=1.31

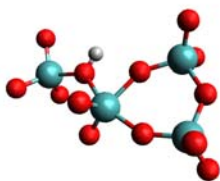

XI E=1.40

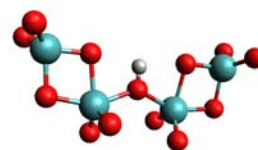

XII E=1.73

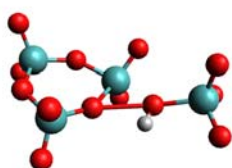

XIII E=1.40

Figure S3.21: Calculated Molecules of  $[\text{HMo}_4\text{O}_{13}]^-$  in lowest multiplicity unless marked with \*.

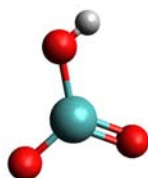

I E=0.00

Figure S3.22: Calculated Molecules of  $[\text{HMoO}_3]$  in lowest multiplicity unless marked with \*.

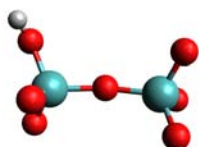

I E=0.00

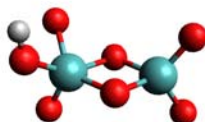

II E=0.69

Figure S3.23: Calculated Molecules of  $[\text{HMo}_2\text{O}_7]$  in lowest multiplicity unless marked with \*.

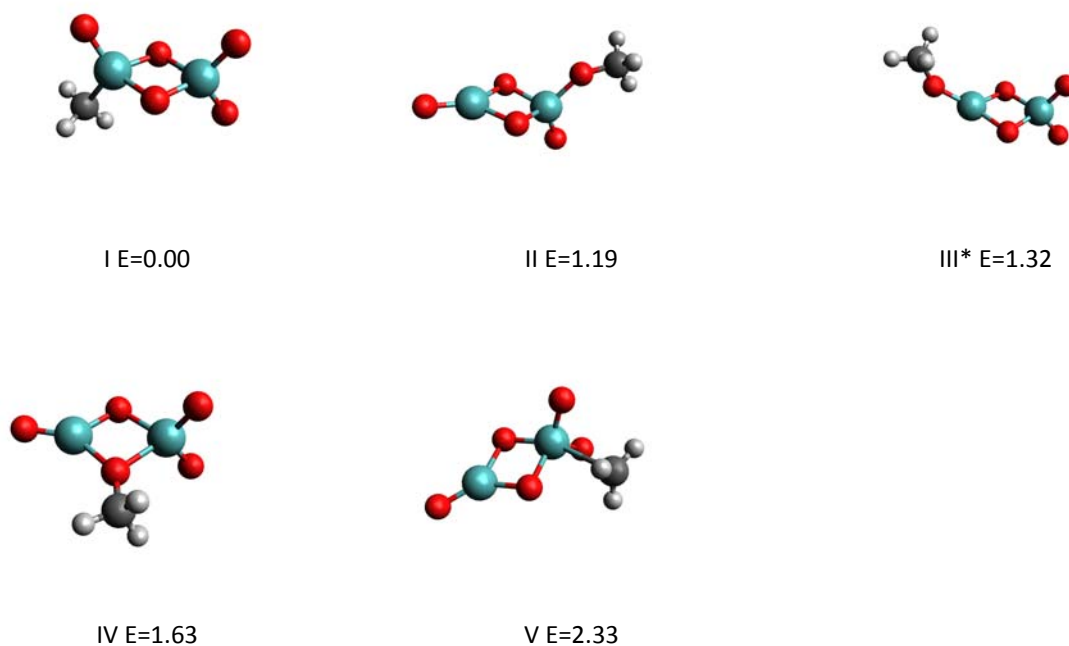

Figure S3.24: Calculated Molecules of  $[\text{CH}_3\text{Mo}_2\text{O}_5]$  in lowest multiplicity unless marked with \*.

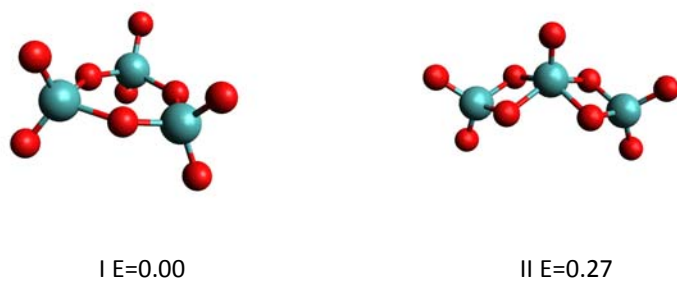

Figure S3.25: Calculated Molecules of  $[\text{Mo}_3\text{O}_9]$  in lowest multiplicity unless marked with \*.

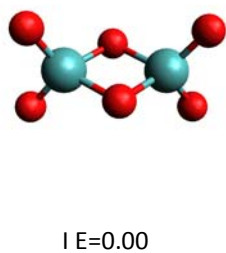

Figure S3.26: Calculated Molecules of  $[\text{Mo}_2\text{O}_6]$  in lowest multiplicity unless marked with \*.

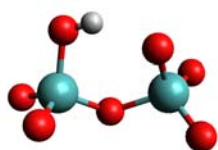

I E=0.00

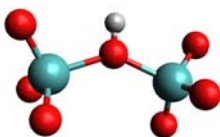

II E=0.92

Figure S3.27: Calculated Molecules of  $[\text{HMo}_2\text{O}_7]^-$  in lowest multiplicity unless marked with \*.

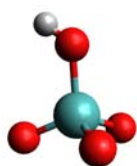

I E=0.00

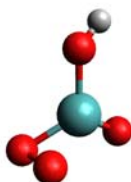

II E=1.49

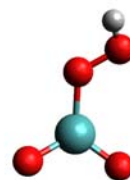

III E=2.59

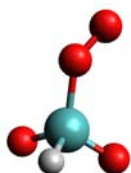

IV E=3.25

Figure S3.28: Calculated Molecules of  $[\text{HMoO}_4]^-$  in lowest multiplicity unless marked with \*.

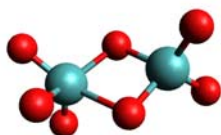

I E=0.00

Figure S3.29: Calculated Molecules of  $[\text{Mo}_2\text{O}_7]^-$  in lowest multiplicity unless marked with \*.

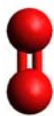

I\* E=0.00

Figure S3.30: Calculated Molecules of [O<sub>2</sub>] in lowest multiplicity unless marked with \*.

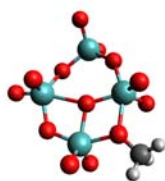

I E=0.00

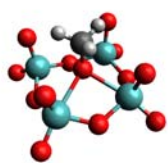

II E=0.18

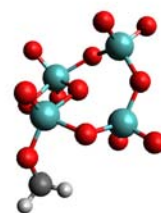

III E=0.23

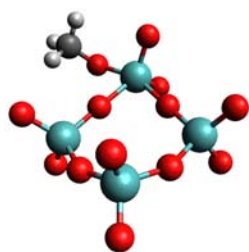

IV E=0.26

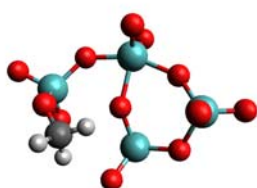

V E=0.37

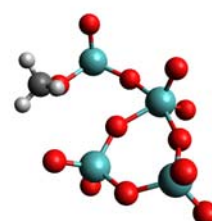

VI E=0.45

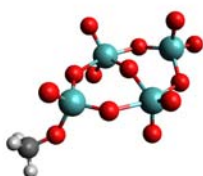

VII E=0.52

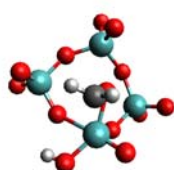

VIII E=0.92

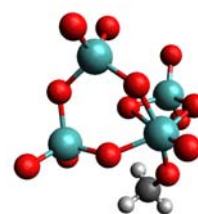

IX E=0.97

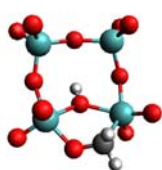

X E=1.10

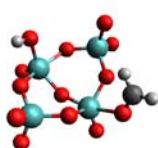

XI E=1.10

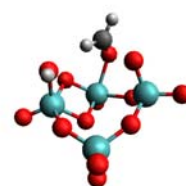

XII E=1.21

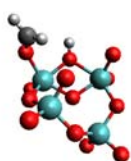

XIII E=1.22

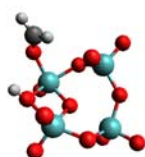

XIV E=1.22

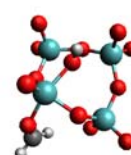

XV E=1.22

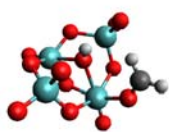

XVI E=1.45

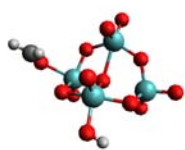

XVII E=1.52

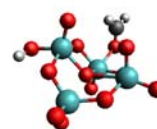

XVIII E=1.52

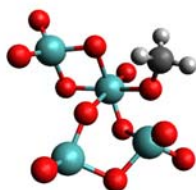

XIX E=1.54

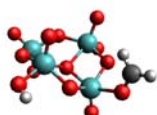

XX E=1.54

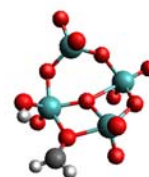

XXI E=1.65

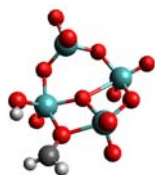

XXII E=1.65

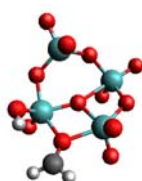

XXIII E=1.65

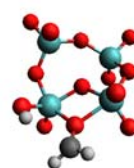

XXIV E=1.65

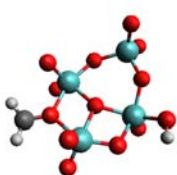

XXV E=1.66

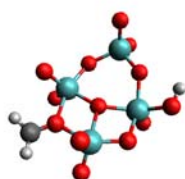

XXVI E=1.67

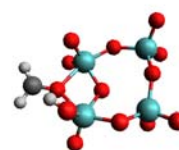

XXVII E=1.72

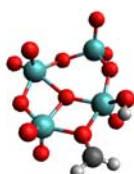

XXVIII E=1.74

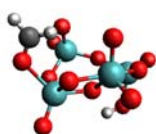

XXIX E=1.84

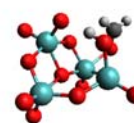

XXX E=1.95

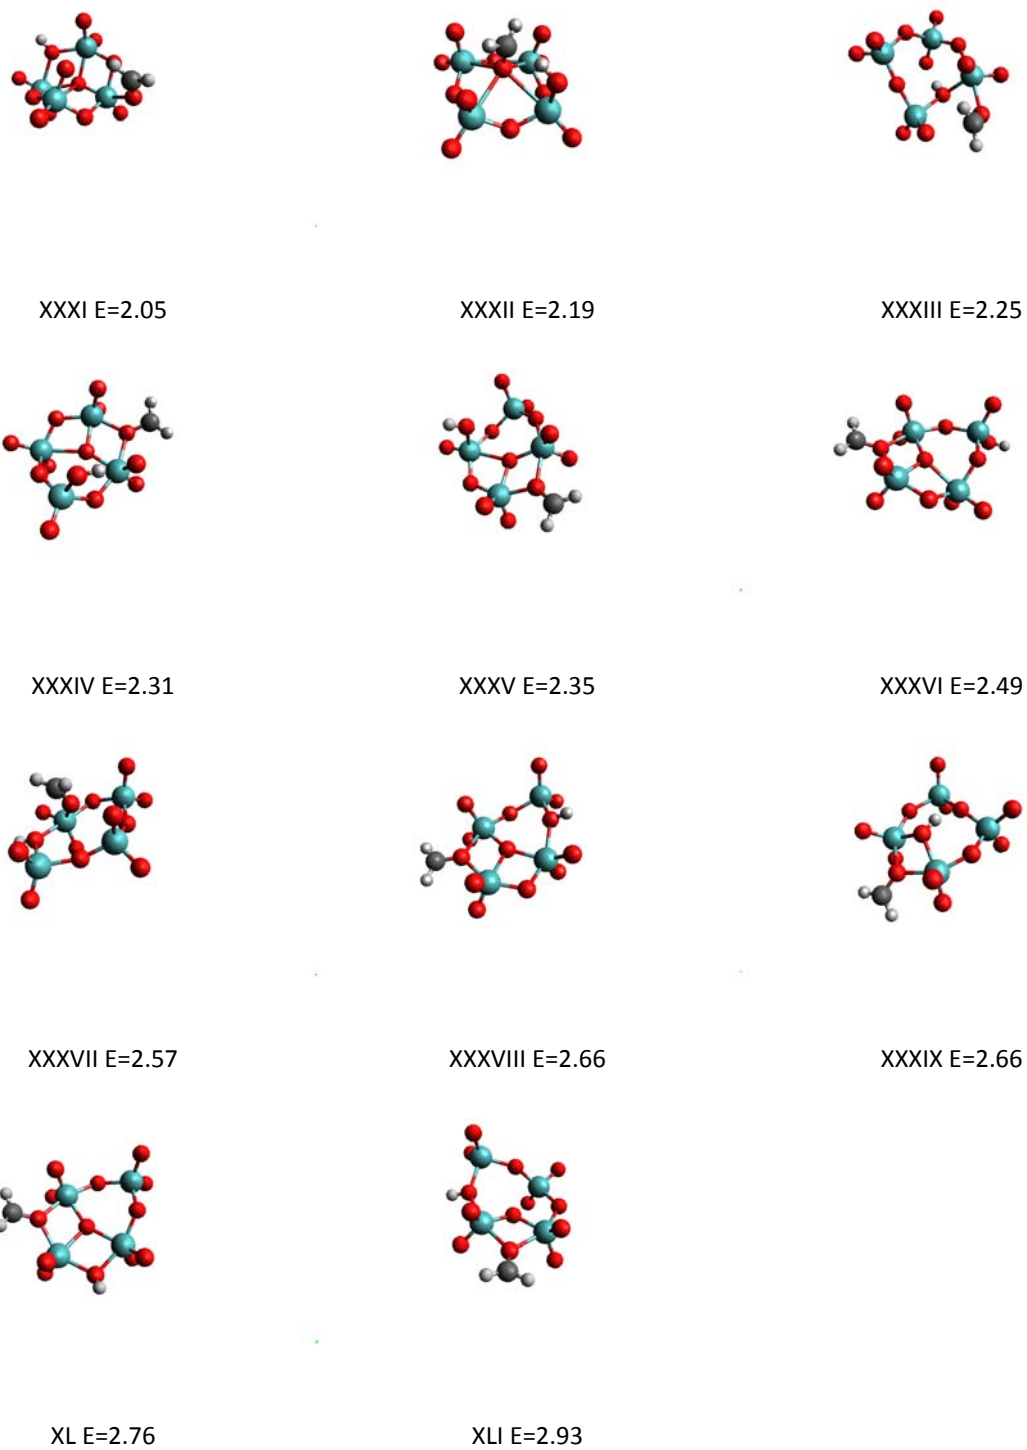

Figure S3.28: Calculated Molecules of  $[\text{CH}_3\text{Mo}_4\text{O}_{13}]^-$  in lowest multiplicity unless marked with \*.



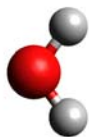

I E=0.00

Figure S3.29: Calculated Molecules of  $[H_2O]$  in lowest multiplicity unless marked with \*.

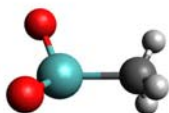

I E=0.00

Figure S3.30: Calculated Molecules of  $[CH_3MoO_2]$  in lowest multiplicity unless marked with \*.

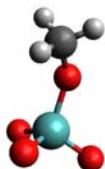

I E=0.00

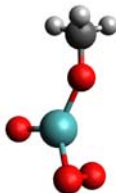

II E=1.49

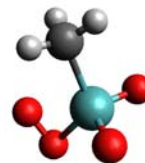

III E=1.62

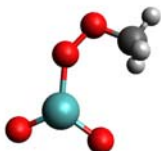

IV E=2.45

Figure S3.31: Calculated Molecules of  $[CH_3MoO_4]$  in lowest multiplicity unless marked with \*.

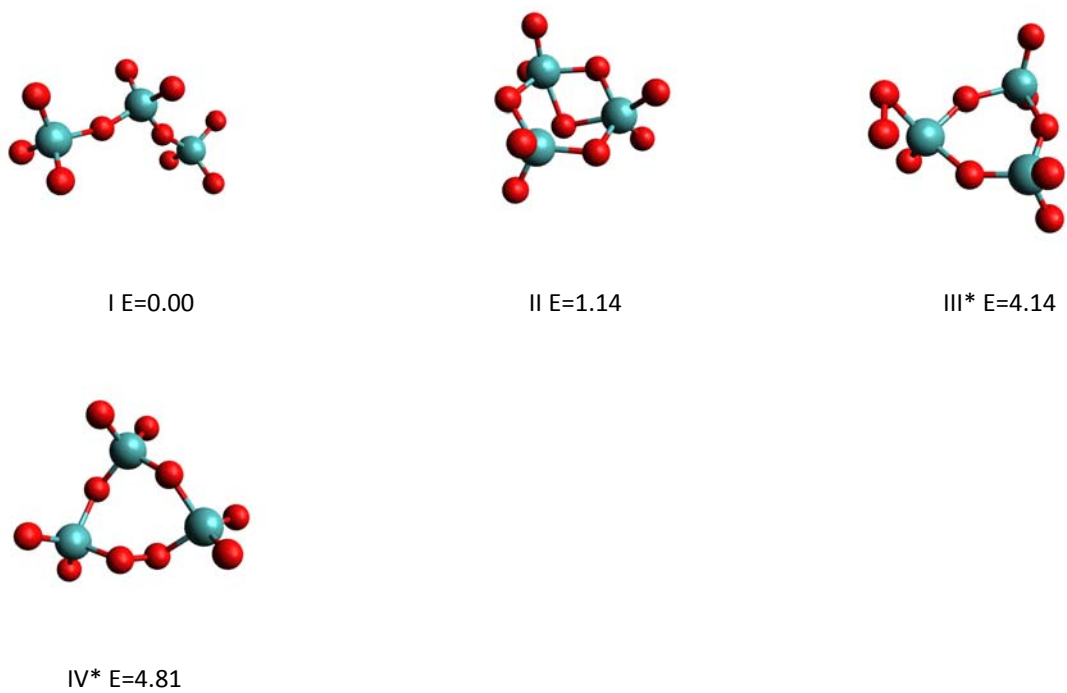

Figure S3.32: Calculated Molecules of  $[\text{Mo}_3\text{O}_{10}]^{2-}$  in lowest multiplicity unless marked with \*.

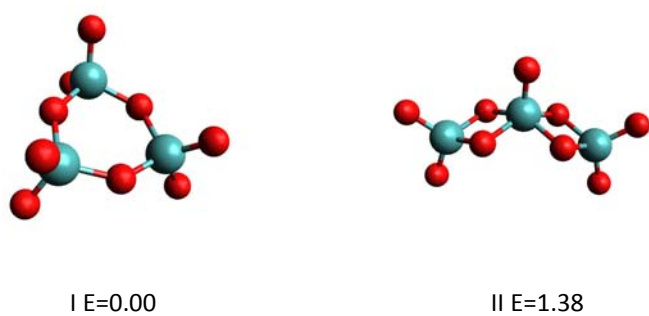

Figure S3.33: Calculated Molecules of  $[\text{Mo}_3\text{O}_9]$  in lowest multiplicity unless marked with \*.

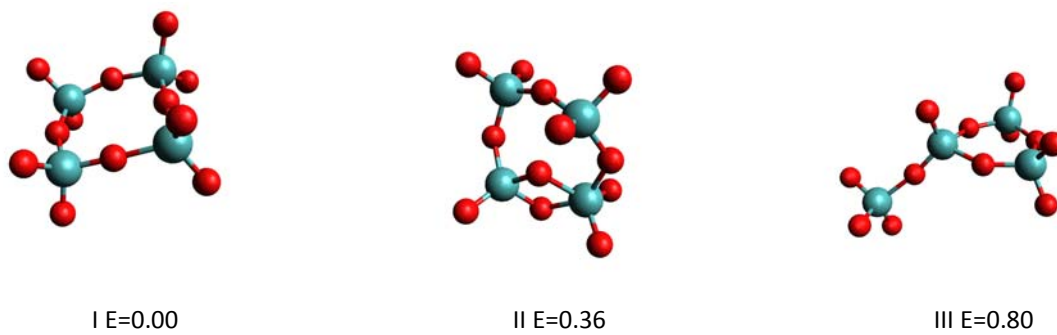

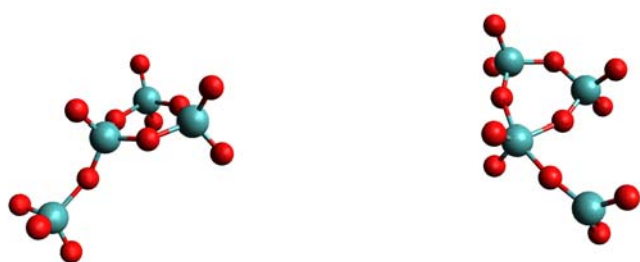

IV E=1.11

V E=1.53

Figure S3.34: Calculated Molecules of  $[\text{Mo}_4\text{O}_{12}]^-$  in lowest multiplicity unless marked with \*.

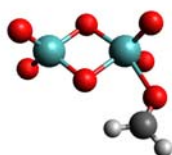

I E=0.00

Figure S3.35: Calculated Molecules of  $[\text{CH}_2\text{Mo}_2\text{O}_7]$  in lowest multiplicity unless marked with \*.

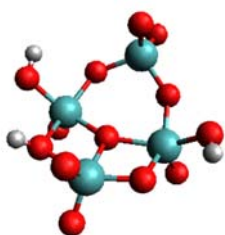

I\* E=0.00

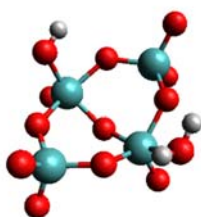

II E=0.44

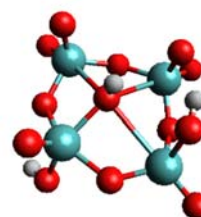

III\* E=0.54

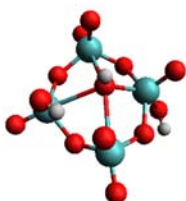

IV\* E=0.59

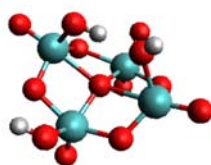

V\* E=1.01

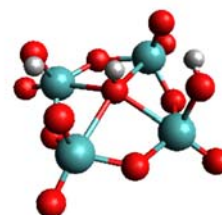

VI E=1.22

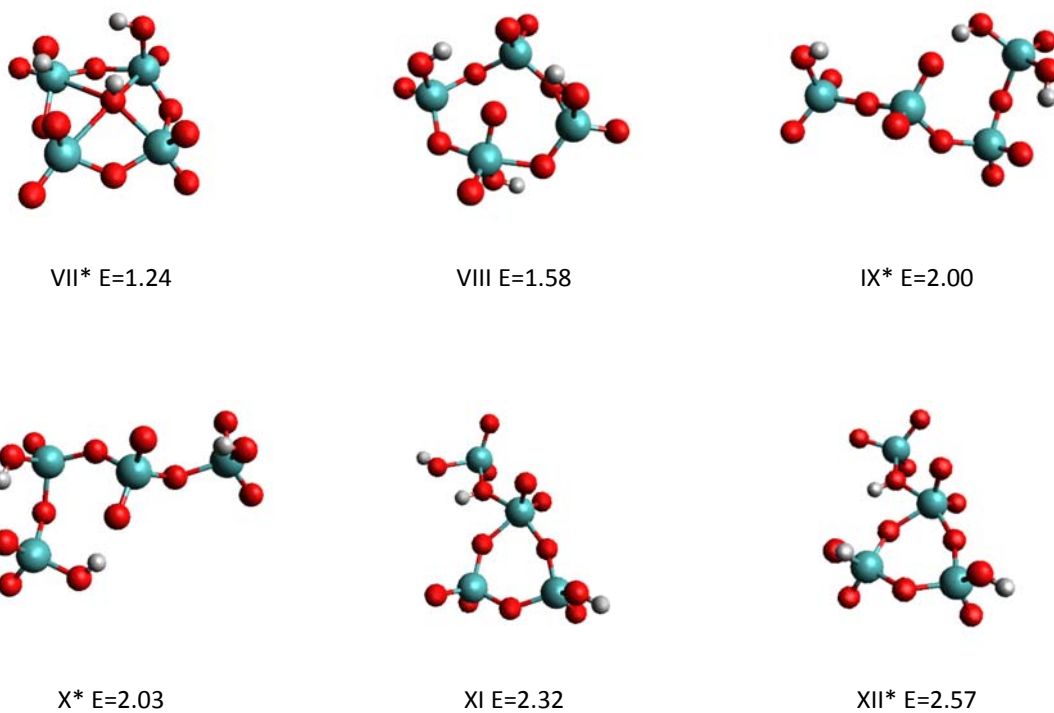

Figure S3.36: Calculated Molecules of  $[\text{H}_3\text{Mo}_4\text{O}_{13}]^-$  in lowest multiplicity unless marked with \*.

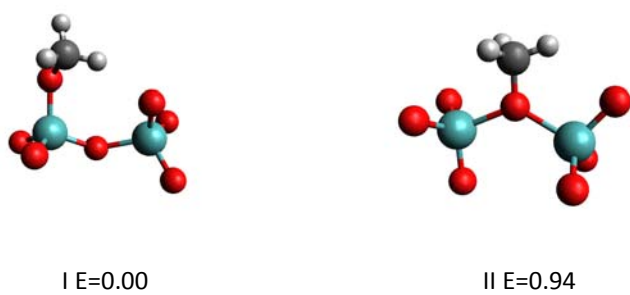

Figure S3.37: Calculated Molecules of  $[\text{CH}_3\text{Mo}_2\text{O}_7]^-$  in lowest multiplicity unless marked with \*.

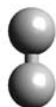

I E=0.00

Figure S3.38: Calculated Molecules of  $[H_2]$  in lowest multiplicity unless marked with \*.

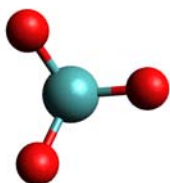

I E=0.00

Figure S3.39: Calculated Molecules of  $[MoO_3]$  in lowest multiplicity unless marked with \*.

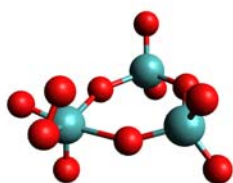

I E=0.00

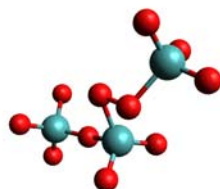

II E=2.38

Figure S3.40: Calculated Molecules of  $[Mo_2O_7]$  in lowest multiplicity unless marked with \*.

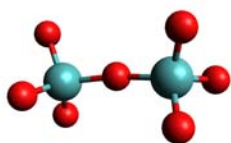

I E=0.00

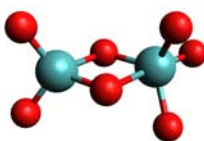

II\* E=0.67

Figure S3.41: Calculated Molecules of  $[Mo_2O_7]$  in lowest multiplicity unless marked with \*.

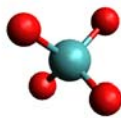

1\* E=0.00

Figure S3.42: Calculated Molecules of  $[\text{MoO}_4]$  in lowest multiplicity unless marked with \*.

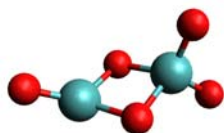

1 E=0.00

Figure S3.43: Calculated Molecules of  $[\text{Mo}_2\text{O}_5]$  in lowest multiplicity unless marked with \*.

Calculated transition states at the wB97XD/def2TZVP level of theory

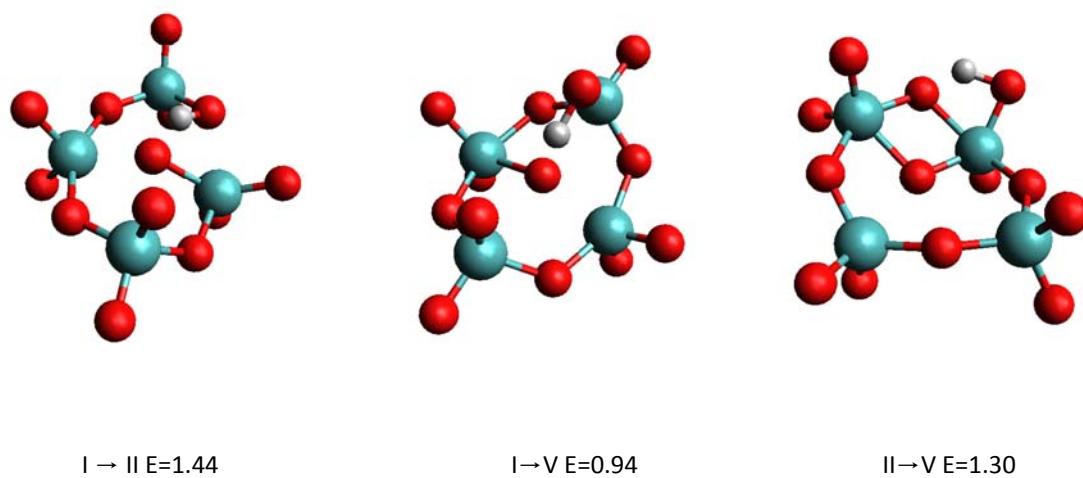

Figure S3.44: Calculated transition states of  $[\text{HMo}_4\text{O}_{13}]^-$  in lowest multiplicity. The given energies are the barriers in eV.

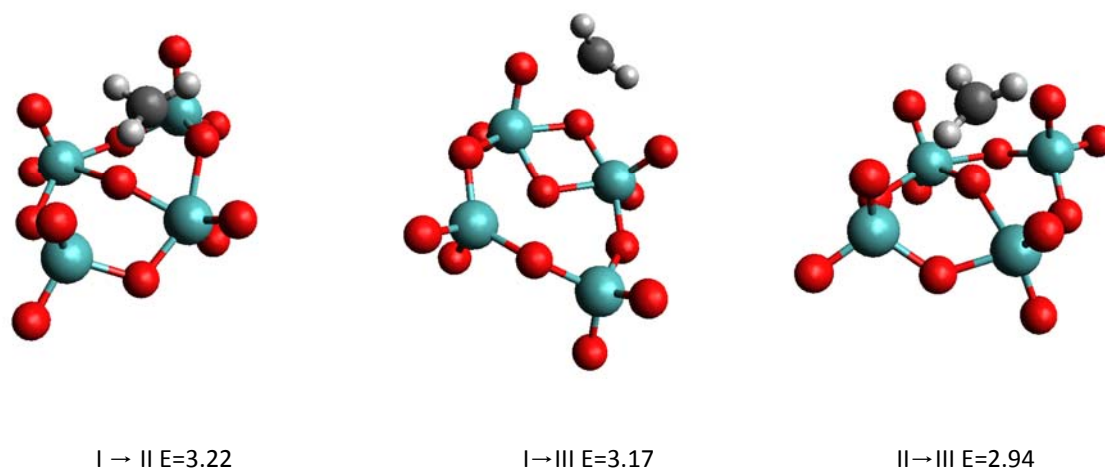

Figure S3.45: Calculated transition states of  $[\text{CH}_3\text{Mo}_4\text{O}_{13}]^-$  in lowest multiplicity. The given energies are the barriers in eV.

**Cartesian coordinates (in Ångstrom) of transition states optimized at the wB97XD/def2TZVP level of theory along the respective ZPE-corrected energy (in eV)**

|                                                                            |          |          |          |                                                                             |          |          |          |                                                                              |          |          |          |
|----------------------------------------------------------------------------|----------|----------|----------|-----------------------------------------------------------------------------|----------|----------|----------|------------------------------------------------------------------------------|----------|----------|----------|
| [HMo <sub>4</sub> O <sub>13</sub> ] I → II<br>E = -34075.44                |          |          |          | [HMo <sub>4</sub> O <sub>13</sub> ] I → V<br>E = -34075.94                  |          |          |          | [HMo <sub>4</sub> O <sub>13</sub> ] II → V<br>E = -34075.59                  |          |          |          |
| Mo                                                                         | 0.05649  | 1.91937  | 0.16136  | Mo                                                                          | 2.53305  | -0.00005 | -0.48350 | Mo                                                                           | 2.71602  | -0.22221 | -0.40588 |
| O                                                                          | 3.08540  | -0.12063 | -1.80126 | O                                                                           | 0.12887  | -3.39184 | -0.30941 | O                                                                            | 0.05383  | 2.22969  | 2.02049  |
| O                                                                          | 0.04093  | 3.16713  | -0.95099 | O                                                                           | 1.70077  | -0.00003 | -2.05801 | O                                                                            | 3.97030  | -0.13217 | 0.70728  |
| O                                                                          | -0.09795 | 2.57053  | 1.69645  | O                                                                           | 4.19800  | -0.00002 | -0.66424 | O                                                                            | 3.38741  | -0.37535 | -1.93795 |
| O                                                                          | -1.89258 | 1.38214  | 0.07042  | O                                                                           | 1.98669  | 1.47142  | 0.40667  | O                                                                            | 1.61895  | -1.69162 | -0.02832 |
| Mo                                                                         | 2.85571  | 0.00605  | -0.14047 | Mo                                                                          | -0.00054 | -1.95088 | 0.53090  | Mo                                                                           | 0.09812  | 2.22516  | 0.34434  |
| Mo                                                                         | -3.01481 | -0.02602 | -0.15868 | Mo                                                                          | -0.00061 | 1.95099  | 0.53082  | Mo                                                                           | -0.18921 | -2.00227 | 0.47769  |
| O                                                                          | -3.74932 | -0.53663 | 1.26517  | O                                                                           | 0.03360  | 2.27275  | 2.17218  | O                                                                            | -0.65576 | -3.36977 | -0.58542 |
| O                                                                          | -4.20224 | 0.28928  | -1.31135 | O                                                                           | 0.12915  | 3.39180  | -0.30970 | O                                                                            | -0.18231 | -2.53784 | 2.05505  |
| O                                                                          | 1.98349  | 1.56754  | 0.32256  | O                                                                           | 1.98669  | -1.47166 | 0.40652  | O                                                                            | 1.64467  | 1.27440  | -0.32431 |
| O                                                                          | 0.22923  | -0.02030 | -0.60424 | O                                                                           | -0.00240 | -0.00008 | -0.38908 | O                                                                            | -0.57868 | -0.18544 | 0.46808  |
| O                                                                          | 4.38060  | 0.05915  | 0.55800  | O                                                                           | 0.03361  | -2.27228 | 2.17233  | O                                                                            | 0.44012  | 3.80311  | -0.10523 |
| Mo                                                                         | 0.17281  | -1.90016 | 0.17668  | Mo                                                                          | -2.53126 | -0.00006 | -0.48627 | Mo                                                                           | -2.44651 | 0.13281  | -0.42625 |
| O                                                                          | 1.99015  | -1.53733 | 0.55696  | O                                                                           | -1.87108 | -1.56810 | 0.30651  | O                                                                            | -1.56319 | 1.89710  | -0.39577 |
| O                                                                          | -0.53363 | -2.19807 | 1.66559  | O                                                                           | -4.18129 | 0.00011  | -0.18013 | O                                                                            | -2.85948 | 0.10413  | -2.05469 |
| O                                                                          | -1.69751 | -1.24718 | -0.81416 | O                                                                           | -1.87091 | 1.56814  | 0.30630  | O                                                                            | -2.17612 | -1.79386 | -0.16101 |
| O                                                                          | 0.20581  | -3.31151 | -0.72524 | O                                                                           | -2.35553 | -0.00023 | -2.16001 | O                                                                            | -3.82445 | 0.42541  | 0.48397  |
| H                                                                          | -0.88717 | -0.48095 | -1.05622 | H                                                                           | 0.64385  | -0.00008 | -1.46121 | H                                                                            | -1.69579 | -2.78857 | -0.71331 |
| [CH <sub>3</sub> Mo <sub>4</sub> O <sub>13</sub> ] I → II<br>E = -35142.15 |          |          |          | [CH <sub>3</sub> Mo <sub>4</sub> O <sub>13</sub> ] I → III<br>E = -35142.20 |          |          |          | [CH <sub>3</sub> Mo <sub>4</sub> O <sub>13</sub> ] II → III<br>E = -35142.43 |          |          |          |
| O                                                                          | 0.00933  | -3.24832 | -1.34011 | O                                                                           | 3.89823  | -0.39649 | 1.07355  | O                                                                            | -4.31806 | 0.03598  | -0.33167 |
| O                                                                          | -0.06774 | -2.70725 | 1.30551  | O                                                                           | 3.57749  | -1.20229 | -1.51849 | O                                                                            | -2.69118 | -0.09687 | 1.86591  |
| Mo                                                                         | 0.10367  | -2.00949 | -0.21280 | Mo                                                                          | 2.77380  | -0.60157 | -0.16397 | Mo                                                                           | -2.71256 | 0.01694  | 0.16945  |
| O                                                                          | 1.97051  | -1.62734 | -0.46587 | O                                                                           | 1.45062  | -1.73936 | 0.36042  | O                                                                            | -1.86209 | -1.44320 | -0.57559 |
| O                                                                          | -1.66642 | -1.26018 | -0.64446 | O                                                                           | 1.94098  | 1.01429  | -0.60184 | O                                                                            | -1.89067 | 1.56560  | -0.38273 |
| O                                                                          | 4.25350  | -0.02644 | -0.58102 | O                                                                           | -0.71071 | -2.97013 | 1.65887  | O                                                                            | -0.02625 | -3.01584 | -1.71687 |
| O                                                                          | 2.89085  | 0.16430  | 1.74076  | O                                                                           | -0.56817 | -2.94832 | -1.09623 | O                                                                            | 0.01103  | -2.93927 | 1.00258  |
| Mo                                                                         | 2.70393  | 0.03169  | 0.06740  | Mo                                                                          | -0.50765 | -1.99730 | 0.30631  | Mo                                                                           | 0.00551  | -1.99652 | -0.38419 |
| O                                                                          | 0.37054  | 0.06772  | 0.41798  | O                                                                           | -0.44999 | 0.04482  | 0.43255  | O                                                                            | 0.13562  | 0.03590  | 0.30010  |
| Mo                                                                         | -2.82640 | 0.01281  | 0.00435  | Mo                                                                          | 0.56985  | 2.20939  | -0.03593 | Mo                                                                           | 0.03501  | 1.98076  | -0.39600 |
| O                                                                          | -3.88431 | 0.57554  | -1.17935 | O                                                                           | 0.70693  | 2.52917  | 1.60017  | O                                                                            | -0.01290 | 2.76428  | -1.88009 |
| O                                                                          | -3.70391 | -0.58746 | 1.31873  | O                                                                           | 1.06540  | 3.61081  | -0.81005 | O                                                                            | 0.13952  | 3.10782  | 0.84708  |
| O                                                                          | 1.98270  | 1.61055  | -0.68773 | O                                                                           | -2.32589 | -1.32122 | 0.06263  | O                                                                            | 1.90969  | -1.53572 | -0.64025 |
| O                                                                          | -1.67843 | 1.32692  | 0.65220  | O                                                                           | -1.26750 | 2.17579  | -0.55022 | O                                                                            | 1.97868  | 1.52888  | -0.60887 |
| Mo                                                                         | 0.13270  | 1.91350  | -0.26995 | Mo                                                                          | -2.25907 | 0.68655  | 0.08320  | Mo                                                                           | 2.60633  | -0.01610 | 0.13209  |
| O                                                                          | -0.56442 | 2.25702  | -1.76184 | O                                                                           | -3.02340 | 1.16106  | 1.49276  | O                                                                            | 4.25890  | -0.05319 | -0.16045 |
| O                                                                          | 0.21922  | 3.28457  | 0.70492  | O                                                                           | -3.45011 | 0.37870  | -1.16053 | O                                                                            | 2.38871  | -0.02137 | 1.85213  |
| C                                                                          | -0.65284 | 0.40768  | 2.32081  | C                                                                           | -3.41622 | -1.63514 | -1.68305 | C                                                                            | 0.31107  | 0.12007  | 2.57104  |
| H                                                                          | 0.39157  | 0.61302  | 2.50668  | H                                                                           | -2.55324 | -2.27771 | -1.80841 | H                                                                            | 0.88278  | -0.56034 | 3.17808  |
| H                                                                          | -1.37882 | 1.10249  | 2.70928  | H                                                                           | -4.20756 | -1.99516 | -1.04664 | H                                                                            | 0.52597  | 1.17500  | 2.65481  |
| H                                                                          | -0.93096 | -0.63600 | 2.28322  | H                                                                           | -3.72399 | -1.08780 | -2.55935 | H                                                                            | -0.68325 | -0.17247 | 2.27405  |



Cartesian coordinates (in Ångstrom) of species optimized at the wB97XD/def2TZVP level of theory along the respective ZPE-corrected energy (in eV)

|                                                                                                                                                                                                                                                                                                                  |                                                                                                                                                                                                                                                                                                                                                                                                            |                                                                                                                                                                                                                                                                                                                                                                                                               |
|------------------------------------------------------------------------------------------------------------------------------------------------------------------------------------------------------------------------------------------------------------------------------------------------------------------|------------------------------------------------------------------------------------------------------------------------------------------------------------------------------------------------------------------------------------------------------------------------------------------------------------------------------------------------------------------------------------------------------------|---------------------------------------------------------------------------------------------------------------------------------------------------------------------------------------------------------------------------------------------------------------------------------------------------------------------------------------------------------------------------------------------------------------|
| [HMo <sub>2</sub> O <sub>6</sub> ] I 1/2<br>E = -16022.04                                                                                                                                                                                                                                                        | O 2.439637 -1.342873 -0.000713<br>O 2.271808 1.388017 0.000460<br>H -0.000489 -1.502217 -0.000847                                                                                                                                                                                                                                                                                                          | O -2.158579 1.398184 0.913969<br>O 0.400625 0.303306 1.260375                                                                                                                                                                                                                                                                                                                                                 |
| Mo 1.495589 0.000346 -0.095315<br>Mo -1.460429 0.000224 0.018274<br>O -0.054987 0.006121 1.217293<br>O -0.253002 -0.004390 -1.338410<br>O 2.366369 -1.388003 0.294968<br>O 2.373747 1.383161 0.299087<br>O -2.433005 1.396627 0.068489<br>O -2.430946 -1.397108 0.080205<br>H 1.977878 0.004796 -1.737337        | [HMo <sub>2</sub> O <sub>6</sub> ] IV 3/4<br>E = -16021.33<br>Mo -1.601689 0.000187 0.009501<br>Mo 1.601700 0.000094 0.009396<br>O 0.000111 0.003639 1.091808<br>O -0.000176 0.006676 -1.339090<br>O -2.508607 1.442256 0.111017<br>O -2.497615 -1.449087 0.106157<br>O 2.499229 -1.448006 0.109178<br>O 2.507051 1.443320 0.108173<br>H -0.000384 -0.002199 -2.291610                                     | [Mo <sub>2</sub> O <sub>8</sub> ] II 1/2<br>E = -20095.20<br>Mo 1.682747 0.061810 -0.017638<br>Mo -1.682723 -0.062230 -0.017382<br>O -0.042654 -1.036184 0.413789<br>O -2.497989 1.553699 0.584515<br>O 0.042323 1.036893 0.410790<br>O 1.915047 0.173717 -1.679398<br>O 2.500669 -1.549717 0.591546<br>O -2.833044 -1.037234 0.773470<br>O 2.832037 1.042745 0.767624<br>O -1.916519 -0.181713 -1.678481     |
| [HMo <sub>2</sub> O <sub>6</sub> ] II 1/2<br>E = -16021.78                                                                                                                                                                                                                                                       | [CH <sub>3</sub> OH] I 1/2<br>E = -3147.90<br>C 0.659632 -0.020077 0.000019<br>H 1.024029 -0.539354 0.893766<br>H 1.023104 -0.549797 -0.887931<br>H 1.082029 0.983939 -0.006169<br>O -0.743325 0.121832 0.000016<br>H -1.140359 -0.748982 0.000092                                                                                                                                                         | [Mo <sub>2</sub> O <sub>8</sub> ] II 3/4<br>E = -20095.22<br>Mo 1.700893 -0.053153 0.022893<br>Mo -1.700870 0.053308 0.022644<br>O -0.106217 1.046504 -0.372338<br>O -2.390622 -1.514504 -0.809642<br>O 0.106116 -1.046699 -0.370927<br>O 1.927898 0.041753 1.686592<br>O 2.392493 1.510937 -0.814361<br>O -2.905244 1.067973 -0.624760<br>O 2.905588 -1.070498 -0.619976<br>O -1.930133 -0.036279 1.686342   |
| Mo 1.257240 -0.097016 0.000235<br>Mo -1.289490 0.020129 -0.000024<br>O 0.007134 0.092026 1.444152<br>O 0.007495 0.092778 -1.443787<br>O 1.938898 -1.634238 -0.000627<br>O 2.349119 1.480105 -0.000325<br>O -2.167427 1.496727 0.000077<br>O -2.210493 -1.418180 -0.000511<br>H 1.956694 2.355479 -0.000709       | [Mo <sub>2</sub> O <sub>6</sub> ] I 1/2<br>E = -16006.13<br>Mo 1.403437 0.000044 0.000054<br>Mo -1.446626 0.000056 -0.000169<br>O 0.094879 0.000873 -1.314181<br>O 0.094674 -0.000593 1.314302<br>O 2.373825 1.396229 0.001130<br>O 2.373153 -1.396494 -0.001190<br>O -2.354370 -1.438436 0.000728<br>O -2.355414 1.437896 -0.000184                                                                       | [Mo <sub>2</sub> O <sub>8</sub> ] III 1/2<br>E = -20095.11<br>Mo 1.573720 -0.129478 -0.010758<br>Mo -1.441329 0.193983 0.013583<br>O -0.153335 1.024499 0.900307<br>O -2.588482 -1.553854 -0.579878<br>O -2.216702 1.286524 -1.016576<br>O 1.987165 -1.024694 1.352999<br>O 2.141038 1.682473 0.119750<br>O -2.575252 -0.468941 1.209101<br>O 2.740911 -0.464856 -1.196843<br>O -0.030394 -0.819802 -0.803690 |
| [HMo <sub>2</sub> O <sub>6</sub> ] II 3/4<br>E = -16021.40                                                                                                                                                                                                                                                       | [Mo <sub>2</sub> O <sub>6</sub> ] I 3/4<br>E = -16002.72<br>Mo 1.484339 -0.044199 0.000165<br>Mo -1.518875 0.013273 -0.000210<br>O 0.076084 -0.033485 -1.227412<br>O -2.346481 1.509351 -0.000129<br>O 2.495595 1.618392 -0.000184<br>O 2.352218 -1.494367 -0.000053<br>O 0.075406 -0.032261 1.227275<br>O -2.471509 -1.405271 0.000741                                                                    | [Mo <sub>2</sub> O <sub>8</sub> ] III 3/4<br>E = -20095.11<br>Mo 1.572846 -0.129474 -0.010311<br>Mo -1.442220 0.194960 0.014133<br>O -0.151757 1.025334 0.897615<br>O -2.586394 -1.554423 -0.581395<br>O -2.219472 1.287747 -1.014301<br>O 1.985675 -1.027736 1.351595<br>O 2.154452 1.678109 0.120825<br>O -2.575121 -0.470150 1.209125<br>O 2.738517 -0.464706 -1.198662<br>O -0.031687 -0.817980 -0.804873 |
| Mo 1.467921 -0.083624 -0.000125<br>Mo -1.526250 0.012285 -0.000005<br>O 0.055343 -0.099425 1.230436<br>O 0.055299 -0.099058 -1.230653<br>O 2.360379 -1.516965 0.000102<br>O 2.412831 1.582952 0.000432<br>O -2.263823 1.558752 -0.000038<br>O -2.555825 -1.353552 0.000283<br>H 1.936188 2.414593 0.000952       | [Mo <sub>2</sub> O <sub>6</sub> ] I 3/4<br>E = -16002.72<br>Mo 1.484339 -0.044199 0.000165<br>Mo -1.518875 0.013273 -0.000210<br>O 0.076084 -0.033485 -1.227412<br>O -2.346481 1.509351 -0.000129<br>O 2.495595 1.618392 -0.000184<br>O 2.352218 -1.494367 -0.000053<br>O 0.075406 -0.032261 1.227275<br>O -2.471509 -1.405271 0.000741                                                                    | [Mo <sub>2</sub> O <sub>8</sub> ] III 3/4<br>E = -20095.11<br>Mo 1.572846 -0.129474 -0.010311<br>Mo -1.442220 0.194960 0.014133<br>O -0.151757 1.025334 0.897615<br>O -2.586394 -1.554423 -0.581395<br>O -2.219472 1.287747 -1.014301<br>O 1.985675 -1.027736 1.351595<br>O 2.154452 1.678109 0.120825<br>O -2.575121 -0.470150 1.209125<br>O 2.738517 -0.464706 -1.198662<br>O -0.031687 -0.817980 -0.804873 |
| [HMo <sub>2</sub> O <sub>6</sub> ] III 1/2<br>E = -16021.37                                                                                                                                                                                                                                                      | [Mo <sub>2</sub> O <sub>8</sub> ] I 1/2<br>E = -20097.82<br>Mo 1.995961 0.011890 -0.005209<br>Mo -1.707964 -0.256045 -0.015308<br>O -1.622347 1.835191 -0.054689<br>O 0.075407 -0.469774 -0.219335<br>O -2.467261 -1.018309 -1.311297<br>O -2.165620 -0.989854 1.428957<br>O 2.568889 0.636216 -1.491856<br>O 2.873163 -1.388239 0.437358<br>O -2.872569 1.473771 0.097896<br>O 2.098357 1.202812 1.220681 | [Mo <sub>2</sub> O <sub>8</sub> ] III 3/4<br>E = -20095.11<br>Mo 1.572846 -0.129474 -0.010311<br>Mo -1.442220 0.194960 0.014133<br>O -0.151757 1.025334 0.897615<br>O -2.586394 -1.554423 -0.581395<br>O -2.219472 1.287747 -1.014301<br>O 1.985675 -1.027736 1.351595<br>O 2.154452 1.678109 0.120825<br>O -2.575121 -0.470150 1.209125<br>O 2.738517 -0.464706 -1.198662<br>O -0.031687 -0.817980 -0.804873 |
| Mo 1.315171 0.000050 -0.023936<br>Mo -1.315124 0.000078 -0.024098<br>O 0.000005 0.000216 -1.433584<br>O -0.000194 0.000100 1.530038<br>O 2.183434 1.475835 -0.038560<br>O 2.182072 -1.476479 -0.038962<br>O -2.182533 -1.476202 -0.038666<br>O -2.182968 1.476097 -0.038561<br>H -0.000528 -0.001946 2.483829    | [Mo <sub>2</sub> O <sub>8</sub> ] I 1/2<br>E = -20097.82<br>Mo 1.995961 0.011890 -0.005209<br>Mo -1.707964 -0.256045 -0.015308<br>O -1.622347 1.835191 -0.054689<br>O 0.075407 -0.469774 -0.219335<br>O -2.467261 -1.018309 -1.311297<br>O -2.165620 -0.989854 1.428957<br>O 2.568889 0.636216 -1.491856<br>O 2.873163 -1.388239 0.437358<br>O -2.872569 1.473771 0.097896<br>O 2.098357 1.202812 1.220681 | [Mo <sub>2</sub> O <sub>8</sub> ] III 3/4<br>E = -20095.11<br>Mo 1.572846 -0.129474 -0.010311<br>Mo -1.442220 0.194960 0.014133<br>O -0.151757 1.025334 0.897615<br>O -2.586394 -1.554423 -0.581395<br>O -2.219472 1.287747 -1.014301<br>O 1.985675 -1.027736 1.351595<br>O 2.154452 1.678109 0.120825<br>O -2.575121 -0.470150 1.209125<br>O 2.738517 -0.464706 -1.198662<br>O -0.031687 -0.817980 -0.804873 |
| [HMo <sub>2</sub> O <sub>6</sub> ] III 3/4<br>E = -16021.33                                                                                                                                                                                                                                                      | [Mo <sub>2</sub> O <sub>8</sub> ] I 3/4<br>E = -20094.93<br>Mo 1.626513 0.036895 -0.024119<br>Mo -1.312880 -0.191671 -0.114347<br>O -1.642221 1.929641 -0.158447<br>O 0.254872 -0.222288 -1.292729<br>O -2.630507 -0.906287 -0.864071<br>O -1.074098 -1.785012 0.976397<br>O 2.578754 1.412450 -0.342652<br>O 2.624579 -1.317418 0.234108                                                                  | [CO <sub>2</sub> ] I 1/2<br>E = -5131.94<br>C -0.000000 0.000356 0.000000<br>O 1.155926 -0.000294 0.000000<br>O -1.155926 0.000027 0.000000                                                                                                                                                                                                                                                                   |
| Mo 1.601707 -0.000004 -0.009434<br>Mo -1.601702 -0.000006 -0.009430<br>O -0.000006 -0.000067 -1.091775<br>O 0.000008 -0.000461 1.339080<br>O 2.502784 1.445914 -0.108557<br>O 2.503357 -1.445558 -0.108809<br>O -2.503312 -1.445575 -0.108807<br>O -2.502877 1.445857 -0.108544<br>H 0.000159 -0.000456 2.291588 | [Mo <sub>2</sub> O <sub>8</sub> ] I 3/4<br>E = -20094.93<br>Mo 1.626513 0.036895 -0.024119<br>Mo -1.312880 -0.191671 -0.114347<br>O -1.642221 1.929641 -0.158447<br>O 0.254872 -0.222288 -1.292729<br>O -2.630507 -0.906287 -0.864071<br>O -1.074098 -1.785012 0.976397<br>O 2.578754 1.412450 -0.342652<br>O 2.624579 -1.317418 0.234108                                                                  | [CO <sub>2</sub> ] I 3/4<br>E = -5127.45<br>C -0.000000 0.460418 0.000000<br>O 1.059676 -0.172654 0.000000<br>O -1.059676 -0.172659 0.000000                                                                                                                                                                                                                                                                  |
| [HMo <sub>2</sub> O <sub>6</sub> ] IV 1/2<br>E = -16019.79                                                                                                                                                                                                                                                       | [Mo <sub>2</sub> O <sub>8</sub> ] I 3/4<br>E = -20094.93<br>Mo 1.626513 0.036895 -0.024119<br>Mo -1.312880 -0.191671 -0.114347<br>O -1.642221 1.929641 -0.158447<br>O 0.254872 -0.222288 -1.292729<br>O -2.630507 -0.906287 -0.864071<br>O -1.074098 -1.785012 0.976397<br>O 2.578754 1.412450 -0.342652<br>O 2.624579 -1.317418 0.234108                                                                  | [Mo <sub>4</sub> O <sub>13</sub> ] <sup>2-</sup> I 1/2<br>E = -34060.70                                                                                                                                                                                                                                                                                                                                       |
| Mo -1.349844 -0.047641 -0.000010<br>Mo 1.349748 -0.047598 0.000025<br>O 0.000008 0.297387 1.346471<br>O 0.000228 0.299022 -1.345884<br>O -2.270897 1.388689 -0.000051<br>O -2.440215 -1.342460 -0.000256                                                                                                         | [Mo <sub>2</sub> O <sub>8</sub> ] I 3/4<br>E = -20094.93<br>Mo 1.626513 0.036895 -0.024119<br>Mo -1.312880 -0.191671 -0.114347<br>O -1.642221 1.929641 -0.158447<br>O 0.254872 -0.222288 -1.292729<br>O -2.630507 -0.906287 -0.864071<br>O -1.074098 -1.785012 0.976397<br>O 2.578754 1.412450 -0.342652<br>O 2.624579 -1.317418 0.234108                                                                  |                                                                                                                                                                                                                                                                                                                                                                                                               |

Mo 0.120352 2.061413 -0.145228  
 O -3.490710 0.001552 1.708918  
 O -0.116543 3.180903 1.098048  
 O 0.048301 2.871607 -1.624947  
 O 1.997105 1.828387 0.035802  
 Mo -2.862425 -0.000004 0.125238  
 Mo 2.580880 0.000036 0.157782  
 O 3.754513 0.001054 -1.066054  
 O 3.352821 -0.001365 1.666091  
 O -1.780299 1.429650 -0.144483  
 O 0.460807 0.000081 -0.018858  
 O -4.159798 -0.000873 -0.980908  
 Mo 0.120305 -2.061280 -0.145286  
 O -1.780782 -1.430766 -0.140885  
 O 0.046312 -2.872108 -1.624569  
 O 1.997283 -1.828303 0.032763  
 O -0.114354 -3.180687 1.098426

[Mo<sub>4</sub>O<sub>13</sub>]<sup>2-</sup> I 3/4  
 E = -34058.23

Mo -0.138892 -2.060152 -0.249408  
 O 3.376377 -0.219651 1.830828  
 O 0.194693 -3.217133 0.936670  
 O -0.153638 -2.830050 -1.751722  
 O -1.979105 -1.793031 0.115489  
 Mo 2.820180 0.027007 0.241666  
 Mo -2.550040 0.062303 0.291041  
 O -3.828338 0.083323 -0.821174  
 O -3.180829 0.027671 1.862989  
 O 1.729810 -1.334759 -0.285882  
 O -0.486857 0.001913 -0.188693  
 O 4.168068 0.137575 -0.794081  
 Mo -0.087858 1.941805 -0.353207  
 O 1.820574 1.550410 0.158216  
 O -0.023110 2.536777 -1.915928  
 O -1.941001 1.885385 0.179008  
 O 0.075562 3.324008 1.041298

[Mo<sub>4</sub>O<sub>13</sub>]<sup>2-</sup> II 1/2  
 E = -34060.51

Mo 4.937626 -0.328274 0.358191  
 O 5.137318 -0.838112 1.980385  
 O 5.910439 1.047503 0.051492  
 O 5.362890 -1.596223 -0.710732  
 Mo 1.531446 1.075551 -0.354368  
 Mo -1.529628 -1.067495 -0.358781  
 O -1.392852 -2.439083 0.608376  
 O -1.600834 -1.579827 -1.961378  
 O -3.032182 -0.148866 0.067872  
 O 0.000700 0.003863 -0.114121  
 O 1.601400 1.598061 -1.953850  
 O 1.396743 2.440884 0.621808  
 O 3.033779 0.153188 0.064386  
 Mo -4.939281 0.320929 0.359597  
 O -5.188568 0.631420 2.024866  
 O -5.314422 1.716319 -0.558613  
 O -5.915270 -0.992859 -0.144847

[Mo<sub>4</sub>O<sub>13</sub>]<sup>2-</sup> II 3/4  
 E = -34057.39

Mo 4.952040 -0.260041 0.339038  
 O 5.169474 -0.735631 1.970104  
 O 5.874581 1.146068 0.011967  
 O 5.429798 -1.528785 -0.707824  
 Mo 1.495044 1.010357 -0.374163  
 Mo -1.560729 -1.156999 -0.289182  
 O -1.474930 -2.437806 0.807311  
 O -1.653837 -1.789491 -1.851833  
 O -2.997911 -0.127486 0.055004  
 O 0.016873 -0.112406 -0.130487  
 O 1.538420 1.540548 -1.973679  
 O 1.319661 2.368819 0.608196  
 O 3.036966 0.141080 0.034394  
 Mo -4.880815 0.490912 0.345474  
 O -5.235675 0.854075 1.978220  
 O -5.445360 1.553255 -0.869463  
 O -5.607149 -1.314443 -0.043037

[Mo<sub>4</sub>O<sub>13</sub>]<sup>2-</sup> III 1/2

E = -34060.23  
 Mo 0.557904 -1.118736 0.040469  
 Mo 4.119201 0.105042 -0.020887  
 Mo -1.543666 1.997985 0.009299  
 Mo -3.337439 -0.906776 -0.028312  
 O -3.135690 1.001430 -0.042073  
 O -1.507885 2.955564 1.403812  
 O 2.220291 -0.361301 0.044158  
 O 5.046733 -1.255907 0.462110  
 O -4.214690 -1.410630 1.340407  
 O -1.669596 -1.447699 0.027211  
 O -0.233494 0.758940 0.012495  
 O 4.543615 0.551831 -1.622340  
 O 4.420136 1.415913 1.044282  
 O -1.450596 3.009113 -1.344268  
 O -4.134531 -1.437823 -1.435419  
 O 0.583222 -2.075655 1.423257  
 O 0.603484 -2.110733 -1.316614

[Mo<sub>4</sub>O<sub>13</sub>]<sup>2-</sup> III 3/4  
 E = -34057.45

Mo -0.427421 -1.170923 -0.025775  
 Mo -4.086446 0.043677 0.031601  
 Mo 1.498567 2.019405 0.002846  
 Mo 3.321614 -0.896743 0.009138  
 O 3.094780 1.001412 0.017810  
 O 1.452864 2.998007 -1.385559  
 O -2.390818 -0.411099 -0.023577  
 O -5.057551 -0.921274 -0.994156  
 O 4.195448 -1.374393 -1.372461  
 O 1.675255 -1.528699 -0.012373  
 O 0.181646 0.816296 -0.002991  
 O -4.690658 0.025138 1.624221  
 O -4.354243 1.810295 -0.659134  
 O 1.430672 3.007745 1.383654  
 O 4.166838 -1.390115 1.403091  
 O -0.644852 -1.988196 -1.507212  
 O -0.667525 -2.021049 1.435185

[Mo<sub>4</sub>O<sub>13</sub>]<sup>2-</sup> IV 1/2  
 E = -34057.95

Mo 3.030845 0.019416 0.113343  
 O 4.021029 0.034236 -1.277468  
 O 3.854842 -0.140485 1.600365  
 O 1.749307 1.513653 0.150498  
 Mo 0.094188 -2.371253 -0.127559  
 Mo 0.127155 2.335863 -0.090166  
 O 0.009110 2.887785 -1.691517  
 O 0.028530 3.675369 0.954986  
 O -1.205940 1.159062 0.278030  
 O 0.182239 -3.310923 -1.539259  
 O -1.488631 -1.431444 -0.123843  
 O 0.138012 -3.411941 1.212858  
 O 1.500368 -1.231039 -0.068192  
 Mo -2.854257 -0.060307 1.386166  
 O -4.041012 -0.766203 -0.864385  
 O -3.407598 -0.212160 1.722222  
 O -3.429396 1.634567 -0.534026

[Mo<sub>4</sub>O<sub>13</sub>]<sup>2-</sup> IV 3/4  
 E = -34057.95

Mo -3.030287 -0.017944 0.118233  
 O -4.025732 -0.032514 -1.268896  
 O -3.848167 0.142723 1.608562  
 O -1.750667 -1.514522 0.150715  
 Mo -0.093733 2.371398 -0.132201  
 Mo -0.128849 -2.336293 -0.094679  
 O -0.014196 -2.884481 -1.697612  
 O -0.029975 -3.678900 0.946481  
 O 1.208571 -1.164943 0.273498  
 O -0.177981 3.302949 -1.549490  
 O 1.487155 1.428345 -0.118674  
 O -0.139580 3.419526 1.202400  
 O -1.499529 1.231183 -0.069474  
 Mo 2.854030 0.059266 0.143655  
 O 4.044865 0.774341 -0.848955  
 O 3.400116 0.201183 1.730570  
 O 3.439025 -1.626130 -0.542919

[Mo<sub>4</sub>O<sub>13</sub>]<sup>2-</sup> V 1/2  
 E = -34057.86

Mo -2.017909 1.894809 -0.223339  
 O 2.250821 -1.285055 0.128885  
 O -2.152822 -2.330153 -1.756042  
 O -2.803622 2.561882 1.135542  
 O -2.665077 0.276665 -0.610070  
 Mo 3.581899 -0.138905 -0.380931  
 Mo -2.148704 -1.779780 -0.159798  
 O -3.918891 -1.473182 0.503778  
 O -2.141881 -3.181996 0.815529  
 O -2.210806 2.951697 -1.549009  
 O 2.486914 1.286485 -0.035234  
 O 4.036058 -0.283264 -0.219188  
 Mo 0.930542 0.178506 0.750985  
 O 4.969072 -0.200316 0.613651  
 O -0.214526 1.639882 0.153549  
 O -0.476129 -1.035349 0.282971  
 O 1.025292 0.260895 2.404327

[Mo<sub>4</sub>O<sub>13</sub>]<sup>2-</sup> V 3/4  
 E = -34057.85

Mo 2.295237 1.761852 0.148378  
 O -2.021094 -1.234273 -0.010337  
 O 3.177187 0.096081 0.363200  
 O 2.442777 2.689739 1.562502  
 O 2.981535 2.615738 -1.149337  
 Mo -3.578552 0.082534 0.388680  
 Mo 2.459612 -1.663431 0.235743  
 O 3.278835 -2.543017 -0.966305  
 O 2.621656 -2.468233 1.723295  
 O -3.582533 0.340658 2.064845  
 O -2.178722 1.157559 -0.373939  
 O -4.444564 -1.604110 0.021552  
 Mo -0.783862 -0.102163 -0.797034  
 O -4.952060 0.865339 -0.279302  
 O 0.599234 1.324585 -0.177610  
 O 0.756978 -1.402699 -0.189245  
 O -0.739516 -0.251025 -2.462104

[Mo<sub>4</sub>O<sub>13</sub>]<sup>2-</sup> VI 1/2  
 E = -34057.44

Mo -2.404935 -1.340211 -0.606620  
 Mo -1.654031 1.924639 0.135727  
 Mo 0.837260 -0.682734 1.069419  
 O -2.719765 0.530002 -0.601133  
 O -0.850283 -1.532110 0.235809  
 O -0.142684 1.135621 0.631495  
 O -1.394477 3.138724 -1.020686  
 O -2.453688 2.607190 1.471971  
 O -3.650675 -2.139503 0.229453  
 O -2.359643 -1.925592 -2.198525  
 O 2.551038 0.364228 1.133033  
 O 1.605359 -0.656631 -1.065912  
 Mo 3.099539 0.229083 -0.635806  
 O 3.260584 1.739336 -1.421809  
 O 4.538521 -0.674009 -0.856913  
 O 0.472688 -0.869046 2.686740  
 O 1.784404 -2.404789 0.972196

[Mo<sub>4</sub>O<sub>13</sub>]<sup>2-</sup> VI 3/4  
 E = -34057.49

Mo -2.418710 -1.343779 -0.596909  
 Mo -1.667242 1.923070 0.131172  
 Mo 0.839437 -0.671801 1.054745  
 O -2.745349 0.525229 -0.580129  
 O -0.848126 -1.525276 0.214732  
 O -0.145910 1.136798 0.600975  
 O -1.429643 3.131505 -1.036177  
 O -2.442111 2.611163 1.479199  
 O -3.644190 -2.154036 0.259205  
 O -2.395672 -1.923924 -2.191734  
 O 2.542599 0.407559 1.123200  
 O 1.639303 -0.685753 -1.059842  
 Mo 3.121644 0.224095 -0.627595  
 O 3.288066 1.712253 -1.454187  
 O 4.570428 -0.675486 -0.794817

O 0.470067 -0.867415 2.668383  
O 1.796110 -2.383441 0.973775

[Mo<sub>4</sub>O<sub>13</sub>]<sup>2-</sup> VII 1/2  
E = -34056.62

Mo 3.750691 0.867301 -0.074099  
Mo 1.396384 -0.999473 -0.100117  
Mo -1.718869 -0.915823 0.145773  
Mo -3.933920 1.016109 -0.045287  
O 2.124988 0.288907 1.024896  
O 2.814468 -0.482460 -1.188270  
O -3.074600 -0.299403 1.229858  
O -2.375356 0.344558 -1.080967  
O -0.000545 -0.897978 -1.198853  
O -0.293304 -0.836977 1.221760  
O 1.749688 -2.591882 0.323967  
O -2.132792 -2.509141 -0.208237  
O -5.447659 0.523874 -0.672211  
O 4.306072 1.241552 1.728562  
O 3.456779 2.352316 -0.819722  
O -3.828537 2.648390 0.447776  
O 5.355795 0.385644 -0.421474

[Mo<sub>4</sub>O<sub>13</sub>]<sup>2-</sup> VII 3/4  
E = -34056.62

Mo -3.750691 -0.867300 -0.074099  
Mo -1.396381 0.999471 -0.100119  
Mo 1.718869 0.915821 0.145771  
Mo 3.933919 -1.016108 -0.045289  
O -2.124991 -0.288909 1.024901  
O -2.814471 0.482460 -1.188269  
O 3.074599 0.299401 1.229861  
O 2.375359 -0.344559 -1.080969  
O 0.000549 0.897981 -1.198849  
O 0.293299 0.836981 1.221761  
O -1.749692 2.591881 0.323971  
O 2.132788 2.509141 -0.208239  
O 5.447659 -0.523868 -0.672209  
O -4.306071 -1.241550 1.728561  
O -3.456781 -2.352320 -0.819719  
O 3.828539 -2.648388 0.447781  
O -5.355791 -0.385640 -0.421469

[Mo<sub>4</sub>O<sub>13</sub>]<sup>2-</sup> VIII 1/2  
E = -34056.49

Mo -2.521087 -1.866509 -0.230795  
O -3.168092 0.024069 -0.478030  
O -0.796458 -1.152729 0.298721  
O -3.328587 -2.653031 1.054624  
O -2.466974 -2.707408 -1.1717376  
Mo -2.532976 1.708289 -0.228995  
O -2.704391 2.618855 -1.653326  
O -3.397071 2.475788 1.017457  
O -0.741656 1.583927 0.231249  
Mo 0.432708 0.139833 0.829896  
O 0.510115 0.203599 2.505753  
O 1.973008 0.072233 -0.165094  
O 3.987593 -1.428406 0.804675  
O 4.111041 -0.086949 -2.093522  
Mo 3.932086 0.095519 -0.413053  
O 4.349826 1.666252 0.088223  
O 5.290311 -1.021146 0.332118

[Mo<sub>4</sub>O<sub>13</sub>]<sup>2-</sup> VIII 3/4  
E = -34056.39

Mo 2.506033 1.873890 -0.209688  
O 3.160250 -0.016702 -0.164097  
O 0.700709 1.299483 0.349383  
O 3.227210 2.856352 0.988911  
O 2.522794 2.497363 -1.799023  
Mo 2.547438 -1.724817 -0.202310  
O 2.796201 -2.435413 -1.725761  
O 3.317673 -2.665677 0.985844  
O 0.739872 -1.553736 0.148163  
Mo -0.430122 -0.128721 0.780119  
O -0.538413 -0.320114 2.444453  
O -1.953998 -0.055553 -0.253852  
O -3.969076 1.097371 1.125012

O -4.158782 0.521679 -2.010789  
Mo -3.915212 -0.072396 -0.436356  
O -4.284781 -1.729705 -0.331660  
O -5.277380 0.777884 0.601648

[CH<sub>2</sub>O<sub>2</sub>] I 1/2  
E = -5159.39

C 0.728185 0.000002 -0.000001  
O -0.435662 -0.734371 -0.000002  
O -0.435667 0.734369 -0.000001  
H 1.300785 0.000004 -0.927022  
H 1.300738 0.000003 0.927051

[CH<sub>2</sub>O<sub>2</sub>] I 3/4  
E = -5157.88

C 0.000000 -0.625618 0.000002  
O -0.940771 0.390179 0.000002  
O 0.940770 0.390181 0.000002  
H 0.000004 -1.244549 -0.907547  
H 0.000004 -1.244620 0.907501

[Mo<sub>2</sub>O<sub>8</sub>]<sup>2-</sup> I 1/2

E = -20098.31  
Mo 2.018499 0.020559 0.000010  
Mo -1.772003 -0.191211 0.000022  
O -1.737771 1.762541 0.000007  
O 0.130168 -0.201327 0.000370  
O -2.199326 -1.063617 -1.407016  
O -2.199870 -1.063276 1.407105  
O 2.517966 0.884525 -1.407374  
O 2.764806 -1.536531 0.000204  
O -3.088426 1.228461 -0.000363  
O 2.518346 0.885149 1.406897

[Mo<sub>2</sub>O<sub>8</sub>]<sup>2-</sup> I 3/4

E = -20096.30  
Mo -1.996431 0.001045 0.000034  
Mo 1.791174 -0.279718 -0.000223  
O 2.124155 1.792060 0.659253  
O -0.109458 0.058002 -0.001240  
O 2.338283 -1.067666 1.428127  
O 2.341667 -1.064680 -1.428942  
O -2.597565 0.661537 1.480358  
O -2.539161 -1.633473 -0.151493  
O 2.126038 1.792660 -0.656672  
O -2.606360 0.924595 -1.328403

[Mo<sub>2</sub>O<sub>8</sub>]<sup>2-</sup> II 1/2

E = -20096.19  
Mo 1.562489 0.099518 -0.011757  
Mo -1.562433 -0.099530 0.011786  
O -0.153340 -0.854592 -0.880670  
O -2.844504 -0.156489 -1.144965  
O -2.048046 -1.086198 1.320497  
O 2.047870 1.086333 -1.320425  
O 2.050168 -1.764284 -0.288464  
O -2.050513 1.764123 0.288210  
O 2.844591 0.156456 1.144954  
O 0.153480 0.854710 0.880710

[Mo<sub>2</sub>O<sub>8</sub>]<sup>2-</sup> II 3/4

E = -20096.19  
Mo 1.562491 0.099682 -0.011534  
Mo -1.562470 -0.099670 0.011530  
O -0.154955 -0.849159 -0.886347  
O -2.847316 -0.152637 -1.142290  
O -2.045408 -1.091747 1.317177  
O 2.045494 1.091646 -1.317240  
O 2.050343 -1.763846 -0.293086  
O -2.050655 1.763795 0.293146  
O 2.847338 0.152502 1.142333  
O 0.155046 0.849383 0.886330

[Mo<sub>2</sub>O<sub>8</sub>]<sup>2-</sup> III 1/2

E = -20095.78

Mo -1.461567 0.001695 0.005065  
Mo 1.619393 -0.000716 0.001295  
O 0.390326 -0.120015 1.326307  
O 2.636573 -1.392921 -0.116816  
O -0.977524 -1.847801 0.316029  
O -0.953662 1.843701 -0.330425  
O -2.526447 0.443920 1.263169  
O 2.632286 1.390771 0.159096  
O -2.484448 -0.441600 -1.289243  
O 0.454307 0.118808 -1.361507

[Mo<sub>2</sub>O<sub>8</sub>]<sup>2-</sup> I 1/2

E = -16003.98  
Mo -1.293334 -0.000009 -0.000023  
Mo 1.293292 -0.000007 0.000025  
O 0.000139 0.000003 -1.459863  
O 0.000016 0.000005 1.459867  
O -2.194556 -1.486643 0.000024  
O -2.194436 1.486692 0.000004  
O 2.194483 1.486624 -0.000011  
O 2.194578 -1.486597 -0.000029

[Mo<sub>2</sub>O<sub>8</sub>]<sup>2-</sup> I 3/4

E = -16003.73  
Mo -1.522558 -0.000056 -0.000003  
Mo 1.522557 -0.000045 0.000003  
O 0.000010 -0.000367 -1.226491  
O -0.000017 -0.000746 1.226491  
O -2.438950 -1.475411 -0.000074  
O -2.438196 1.475770 0.000078  
O 2.437404 1.476228 0.000080  
O 2.439754 -1.474939 -0.000083

[HMo<sub>3</sub>O<sub>10</sub>]<sup>-</sup> I 1/2

E = -26073.63  
Mo 2.324310 -0.878157 0.023527  
O 1.477853 0.886876 0.152700  
O -1.351960 -2.080932 -0.982659  
O 1.017623 -2.030321 -0.040274  
O 3.309870 -1.155511 1.378401  
Mo 0.001232 1.946197 -0.012236  
O -0.150188 2.953160 1.324862  
O 0.119269 2.917941 -1.378808  
O -1.506619 0.831502 -0.163398  
Mo -2.308404 -0.869182 0.008909  
O -3.890788 -0.835321 -0.556609  
O -2.328048 -1.299866 1.632798  
O 3.263530 -0.951407 -1.389725  
H -0.404108 -2.240978 -0.666697

[HMo<sub>3</sub>O<sub>10</sub>]<sup>-</sup> I 3/4

E = -26070.68  
Mo 2.101320 -0.698653 -0.034054  
O 1.405719 1.036128 0.259581  
O -0.120887 -1.109414 -0.699322  
O 2.502627 -1.001699 -1.641625  
O 1.413124 -2.213099 0.854703  
Mo -0.243535 1.934088 0.070816  
O -0.249184 3.317144 1.035810  
O -0.478523 2.399616 -1.532151  
O -1.551338 0.793990 0.614446  
Mo -2.040818 -1.063653 0.033701  
O -3.169224 -1.111346 -1.235198  
O -2.341608 -2.115619 1.328017  
O 3.552922 -0.688532 0.829655  
H -0.021627 -1.672213 -1.470757

[HMo<sub>3</sub>O<sub>10</sub>]<sup>-</sup> II 1/2

E = -26073.46  
Mo -0.854565 -1.695387 0.035991  
O 1.008523 -1.537973 0.432785  
O -1.836747 -0.104682 0.432464  
O -1.261625 -2.503350 -1.382409  
O -1.367970 -2.712432 1.273708  
Mo 1.895895 0.107882 0.035790  
O 2.801760 0.158787 -1.380805  
O 0.000685 0.000639 -1.266272

Mo -1.041115 1.587695 0.035801  
 O 0.827648 1.642674 0.432685  
 O -1.665156 2.538003 1.275436  
 O 3.030311 0.171370 1.276214  
 O -1.538416 2.346291 -1.381088  
 H -0.001119 -0.002575 -2.220164

[HMo<sub>3</sub>O<sub>10</sub>] II 3/4  
 E = -26070.61

Mo -2.128973 0.008002 0.166279  
 O -0.722686 -1.381929 0.400533  
 O -0.713126 1.388871 0.393960  
 O -2.726216 0.005588 -1.442776  
 O -3.273877 0.014589 1.413064  
 Mo 1.044052 -1.712059 0.103727  
 O 1.287883 -2.578369 -1.320948  
 O -0.130536 -0.007859 -2.567943  
 Mo 1.056906 1.705602 0.101446  
 O 1.866002 -0.006285 0.050621  
 O 1.701555 2.599945 1.375257  
 O 1.684843 -2.610833 1.376419  
 O 1.311780 2.568926 -1.323057  
 H -1.108368 -0.006045 -2.442022

[HMo<sub>3</sub>O<sub>10</sub>] III 1/2  
 E = -26073.14

Mo -1.637386 0.867104 -0.043176  
 O -1.743709 -0.985752 0.338771  
 O 0.019149 2.224073 0.013915  
 O -2.750400 1.323559 -1.215263  
 O -2.099899 1.567964 1.428112  
 Mo -0.016101 -1.840321 0.027725  
 O -0.022986 -2.810684 -1.340717  
 O 0.001257 0.124908 -0.917863  
 Mo 1.652245 0.838944 -0.042945  
 O 1.724836 -1.014807 0.342105  
 O 2.128393 1.534295 1.426608  
 O -0.026106 -2.882878 1.350580  
 O 2.772946 1.272555 -1.216260  
 H 0.024274 2.813582 0.772750

[HMo<sub>3</sub>O<sub>10</sub>] III 3/4  
 E = -26070.57

Mo -1.695541 0.809344 -0.052136  
 O -1.810609 -1.012827 0.337742  
 O 0.000547 2.093405 0.091232  
 O -2.729666 1.236740 -1.304828  
 O -2.261909 1.569870 1.349299  
 Mo -0.000744 -1.761674 -0.053712  
 O -0.000703 -3.094816 -1.055012  
 O 0.000168 0.031349 -0.942406  
 Mo 1.696459 0.807907 -0.051818  
 O 1.810244 -1.014256 0.337179  
 O 2.262447 1.567618 1.350344  
 O -0.002918 -2.192869 1.864584  
 O 2.731443 1.235444 -1.303966  
 H 0.000306 2.708512 0.828643

[HMo<sub>3</sub>O<sub>10</sub>] IV 1/2  
 E = -26072.87

Mo 0.108018 1.725603 -0.092436  
 O -1.694200 0.930278 0.475817  
 O 1.697176 0.871369 0.543430  
 O 0.338834 3.059915 -1.072024  
 O -0.247867 2.617342 1.563673  
 Mo -1.720631 -0.868052 -0.012573  
 O -2.488481 -1.191631 -1.473935  
 O -0.081801 0.380105 -1.231069  
 Mo 1.665580 -0.971394 0.052610  
 O -0.025776 -1.761495 0.277716  
 O 2.643418 -1.726760 1.190512  
 O -2.685496 -1.580688 1.169701  
 O 2.376801 -1.276054 -1.437223  
 H -0.885473 2.202349 2.147936

[HMo<sub>3</sub>O<sub>10</sub>] IV 3/4  
 E = -26070.72

Mo -0.087345 -1.738494 -0.093600  
 O 1.709101 -1.045899 0.399246  
 O -1.816348 -0.863247 0.375125  
 O -0.134970 -2.896688 -1.293502  
 O -0.198924 -2.656061 1.593376  
 Mo 1.771128 0.772702 0.001235  
 O 2.878110 1.104471 -1.218689  
 O 0.016138 0.121685 -0.994010  
 Mo -1.662684 0.956620 -0.022670  
 O 0.111326 1.982184 -0.067825  
 O -2.175339 1.719164 1.394370  
 O 2.352608 1.487834 1.415745  
 O -2.717669 1.414921 -1.247170  
 H -1.078412 -2.617680 1.978134

[HMo<sub>3</sub>O<sub>10</sub>] V 1/2  
 E = -26072.76

Mo -0.834900 -1.636925 -0.015247  
 O 1.039604 -1.748679 0.239357  
 O -2.311918 -0.027466 -0.140309  
 O -1.390343 -2.807277 -1.094072  
 O -1.410685 -1.962362 1.532283  
 Mo 1.849923 0.022794 -0.011366  
 O 2.885163 0.037296 -1.332753  
 O -0.092598 -0.001392 -0.905619  
 Mo -0.876322 1.615410 -0.015089  
 O 0.995423 1.772213 0.241692  
 O -1.460720 1.930537 1.531418  
 O 2.811594 0.033663 1.371568  
 O -1.457560 2.770724 -1.096482  
 H -2.689130 -0.031770 -1.025179

[HMo<sub>3</sub>O<sub>10</sub>] VI 1/2  
 E = -26072.45

Mo -3.180419 -0.528077 -0.017382  
 O -1.197392 -0.024343 -0.096538  
 O 4.508209 0.144059 0.445948  
 O -3.610621 -0.704230 1.624291  
 O -3.416523 -1.984480 -0.871053  
 Mo 0.140071 1.106279 0.103277  
 O 0.765535 1.685323 -1.525055  
 O -0.380946 2.436451 0.951181  
 O 1.501130 0.321098 0.966048  
 Mo 3.041525 -0.611782 0.045743  
 O 2.588135 -0.311306 -1.602530  
 O 3.107502 -2.268754 0.396796  
 O -4.049151 0.750585 -0.741068  
 H 1.423556 1.055160 -1.912955

[HMo<sub>3</sub>O<sub>10</sub>] VI 3/4  
 E = -26070.03

Mo 3.207117 -0.555484 -0.059078  
 O 1.501570 0.080397 -0.860392  
 O -4.412418 0.835708 -0.138061  
 O 4.535831 0.034316 -0.949882  
 O 3.236046 -2.259461 -0.005449  
 Mo 0.144797 1.052591 -0.113102  
 O 0.426866 0.886285 1.737963  
 O 0.090342 2.683558 -0.475632  
 O -1.603376 0.160145 -0.083700  
 Mo -3.315703 -0.443904 -0.058303  
 O -3.710115 -1.393457 1.531832  
 O -3.588167 -1.528841 -1.323357  
 O 3.162011 0.125266 1.530244  
 H 1.370418 0.774145 1.971733

[HMo<sub>3</sub>O<sub>10</sub>] VII 1/2  
 E = -26072.44

Mo -1.833280 0.000012 0.092130  
 O -1.019748 -1.544564 0.566879  
 O -1.020148 1.544566 0.567217  
 O -2.649429 0.000222 -1.614293  
 O -3.235104 -0.001276 1.028248  
 Mo 0.983099 -1.515606 -0.030294  
 O 1.386933 -2.605632 -1.243519  
 O -0.001258 -0.000035 -0.988749  
 Mo 0.982799 1.515719 -0.030218  
 O 2.160303 0.000192 0.071183

O 1.373321 2.240757 1.445942  
 O 1.373654 -2.240614 1.445904  
 O 1.386298 2.605857 -1.243410  
 H -3.608496 -0.001060 -1.611150

[HMo<sub>3</sub>O<sub>10</sub>] VII 3/4  
 E = -26069.72

Mo 0.002877 -1.714224 -0.034149  
 O 1.732601 -1.008189 0.367831  
 O -1.728672 -1.012862 0.369151  
 O 0.004580 -3.332312 -0.974845  
 O 0.004111 -1.833501 1.873810  
 Mo 1.636938 0.898293 -0.022921  
 O 2.433744 1.367100 -1.426268  
 O 0.000481 -0.193575 -1.101727  
 Mo -1.640040 0.893362 -0.022605  
 O -0.003019 1.835111 0.313331  
 O -2.593316 1.465031 1.244971  
 O 2.587258 1.471739 1.246068  
 O -2.437395 1.357961 -1.427034  
 H 0.006470 -4.184125 -0.535948

[Mo<sub>2</sub>O<sub>7</sub>]<sup>2-</sup> I 1/2  
 E = -18053.67

O -2.488477 -0.307114 -1.593904  
 O 2.485810 0.411516 1.570806  
 Mo -1.902201 0.000289 -0.000071  
 O 2.485500 -1.567187 -0.427237  
 O -2.487032 1.533541 0.533112  
 Mo 1.902367 0.000112 -0.000162  
 O -2.485041 -1.228550 1.062310  
 O 2.488339 1.153697 -1.142353  
 O 0.000027 0.001990 -0.001513

[Mo<sub>2</sub>O<sub>7</sub>]<sup>2-</sup> I 3/4  
 E = -18050.27

O -2.493636 -0.601296 1.480538  
 O 2.687517 0.508413 -1.493601  
 Mo -1.880757 0.034147 -0.004430  
 O 2.638412 0.761117 1.406762  
 O -2.535002 -0.865206 -1.326995  
 Mo 1.940934 0.059057 -0.005476  
 O -2.364631 1.687975 -0.152013  
 O 1.742110 -1.917107 0.162609  
 O 0.009299 -0.063218 -0.025295

[CH<sub>3</sub>O] I 1/2  
 E = -3129.96

C 0.570291 0.000067 0.013477  
 H 1.002236 0.908987 0.453855  
 H 1.002052 -0.907169 0.457555  
 H 0.866253 -0.002399 -1.052729  
 O -0.786536 0.000022 0.007557

[MoO<sub>4</sub>] I 1/2  
 E = -10049.16

Mo -0.042668 -0.000040 0.006635  
 O 0.263474 -0.010610 1.709038  
 O 1.733952 0.004292 -0.761301  
 O -0.887110 -1.409309 -0.499995  
 O -0.886308 1.415838 -0.482574

[MoO<sub>4</sub>] I 3/4  
 E = -10045.67

Mo 0.112685 0.000008 -0.000018  
 O -1.232515 -0.000205 1.490858  
 O -1.231839 0.000007 -1.491287  
 O 0.936250 1.512011 0.000366  
 O 0.936509 -1.511857 0.000157

[MoO<sub>4</sub>] II 1/2  
 E = -10038.65

Mo 0.152469 -0.137317 0.117060  
 O 1.489058 1.240992 0.013125  
 O 2.104472 -0.647811 -0.422013

O -1.915822 -0.103397 0.471541  
O -2.478171 0.231131 -0.677216

[MoO<sub>4</sub>]<sup>II</sup> 3/4  
E = -10045.67  
Mo 0.329285 0.005681 -0.000130  
O 0.933778 1.613309 0.000226  
O 1.442836 -1.302538 0.000327  
O -1.438857 -0.444055 -0.000095  
O -2.666505 0.103460 0.000223

[MoO<sub>4</sub>]<sup>II</sup> 5/6  
E = -10045.27  
Mo 0.340625 -0.000023 -0.053931  
O 1.114477 1.526981 0.169023  
O 1.116128 -1.526280 0.168470  
O -1.661518 0.000589 -0.586469  
O -2.357370 -0.001170 0.532115

[MoO<sub>4</sub>]<sup>II</sup> 7/8  
E = -10041.83  
Mo 0.385024 0.001963 -0.189183  
O 1.476405 1.136464 0.470620  
O 0.135981 -1.901966 0.326671  
O -1.777550 -0.272209 0.086844  
O -1.856214 1.027405 0.109075

[HMoO<sub>4</sub>]<sup>I</sup> 1/2  
E = -10067.57  
Mo -0.067334 -0.002623 0.001043  
O -0.571282 0.744804 -1.464183  
O 1.857973 -0.303286 -0.066310  
O -0.406073 1.041589 1.326167  
O -0.825464 -1.531019 0.202034  
H 2.386774 0.493462 -0.025469

[HMoO<sub>4</sub>]<sup>I</sup> 3/4  
E = -10064.38  
Mo -0.168443 -0.000090 0.006594  
O -1.056575 -1.468158 0.066179  
O 1.431888 0.070612 1.146966  
O 1.333590 -0.028461 -1.319406  
O -1.104816 1.437972 -0.009668  
H 2.241896 -0.091916 0.650492

[HMoO<sub>4</sub>]<sup>II</sup> 1/2  
E = -10062.54  
Mo 0.341016 0.004939 0.140862  
O 0.754202 1.588031 -0.332487  
O 1.384508 -1.209217 -0.455328  
O -1.393633 -0.475110 0.011709  
O -2.609285 0.073769 -0.194881  
H 0.591015 -0.027233 1.851676

[HMoO<sub>4</sub>]<sup>II</sup> 3/4  
E = -10062.15  
Mo 0.352165 0.000005 0.142570  
O 0.948019 1.491264 -0.456600  
O 0.948472 -1.491051 -0.456636  
O -1.659649 -0.000078 0.572828  
O -2.176117 -0.000156 -0.637454  
H 0.723279 -0.000068 1.834948

[HMoO<sub>4</sub>]<sup>III</sup> 1/2  
E = -10062.18  
Mo 0.375612 -0.010562 0.000014  
O 0.577459 1.698238 0.000025  
O 1.773125 -0.998970 -0.000105  
O -1.412673 -0.753956 0.000145  
O -2.620770 -0.003595 -0.000096  
H -2.312851 0.909876 -0.000333

[HMoO<sub>4</sub>]<sup>III</sup> 3/4

E = -10062.14  
Mo 0.379845 -0.001007 -0.070155  
O 1.319382 1.408408 0.282991  
O 0.936919 -1.624537 0.172176  
O -1.508573 0.199360 -0.653001  
O -2.415647 0.124253 0.503084  
H -2.610128 -0.817561 0.504530

[HMoO<sub>4</sub>]<sup>IV</sup> 1/2  
E = -10061.52  
Mo 0.289444 -0.062587 -0.000069  
O 1.502903 1.432749 0.000098  
O 0.903968 -1.634930 0.000146  
O -1.474125 -0.010254 -0.000147  
O -2.759310 0.368929 0.000225  
H 2.455854 1.376692 0.000310

[Mo<sub>2</sub>O<sub>7</sub>]<sup>I</sup> 1/2  
E = -13949.63  
Mo -1.579842 0.012252 -0.003939  
Mo 1.315043 -0.054988 -0.009239  
O -0.015743 -0.984544 0.881524  
O 0.031582 1.019231 -0.812920  
O -3.645126 0.018604 -0.004303  
O 2.479596 -1.109342 -0.706293  
O 2.539886 1.280411 0.711177

[Mo<sub>2</sub>O<sub>7</sub>]<sup>I</sup> 3/4  
E = -13956.34  
Mo -1.545550 -0.000278 -0.000003  
Mo 1.303367 -0.000175 -0.000003  
O -0.020036 -0.002567 1.300922  
O -0.020025 -0.000120 -1.300926  
O -3.233568 0.000358 0.000011  
O 2.276344 -1.400366 -0.001122  
O 2.268748 1.405074 0.001147

[Mo<sub>2</sub>O<sub>7</sub>]<sup>I</sup> 5/6  
E = -13956.32  
Mo -1.577479 -0.186827 -0.000007  
Mo 1.290836 0.042174 -0.000001  
O 0.016209 -0.162384 1.314761  
O 0.016234 -0.162523 -1.314769  
O -3.029737 0.691501 0.000030  
O 2.473903 -1.188205 0.000086  
O 2.028269 1.581038 -0.000068

[Mo<sub>2</sub>O<sub>7</sub>]<sup>I</sup> 7/8  
E = -13953.21  
Mo 1.538307 -0.000131 0.000000  
Mo -1.327113 0.000005 0.000000  
O -0.052920 -0.000311 1.324252  
O -0.052918 -0.000316 -1.324251  
O 3.598077 0.000356 -0.000000  
O -2.299820 1.405287 -0.000003  
O -2.301190 -1.404353 0.000001

[HMo<sub>4</sub>O<sub>12</sub>]<sup>I</sup> 1/2  
E = -32027.89  
Mo -0.000040 2.194452 0.085745  
O -3.027868 -0.199835 1.453291  
O -0.000118 2.397773 1.752115  
O -0.000005 3.740971 -0.558505  
O 1.611445 1.460040 -0.556148  
Mo -2.604009 -0.113789 -0.175318  
Mo 2.604080 -0.113736 -0.175313  
O 4.032352 -0.002556 -1.055344  
O 3.027825 -0.199880 1.453318  
O -1.611443 1.460038 -0.556291  
O -0.000187 -0.295927 0.840286  
O -4.032236 -0.002618 -1.055419  
Mo 0.000017 -2.223720 0.022779  
O -1.744432 -1.640286 -0.734453  
O 1.744386 -1.640145 -0.734503  
O 0.000064 -3.701189 0.797990  
H -0.000240 -0.225757 1.797782

[HMo<sub>4</sub>O<sub>12</sub>]<sup>I</sup> 3/4  
E = -32028.19  
Mo 0.000037 2.193167 0.075369  
O -3.019745 -0.190136 1.465772  
O -0.000010 2.402213 1.740889  
O 0.000031 3.737098 -0.574963  
O 1.612010 1.455404 -0.561360  
Mo -2.607854 -0.113058 -0.166403  
Mo 2.607857 -0.113105 -0.166396  
O 4.042376 -0.001939 -1.036066  
O 3.019811 -0.190283 1.465757  
O -1.611895 1.455361 -0.561438  
O -0.000072 -0.299315 0.837904  
O -4.042389 -0.001829 -1.036036  
Mo -0.000041 -2.221125 0.015268  
O -1.755075 -1.642596 -0.724869  
O 1.754968 -1.642567 -0.724923  
O -0.000016 -3.718979 0.756292  
H 0.000090 -0.226400 1.795174

[HMo<sub>4</sub>O<sub>12</sub>]<sup>II</sup> 1/2  
E = -32026.97  
Mo -2.300929 -1.993791 0.076662  
O -2.183424 -2.309488 1.721820  
O -0.847659 -2.610870 -0.818604  
O -3.681266 -2.743149 -0.522918  
Mo -2.096661 1.718925 -0.110011  
Mo 1.631236 2.099974 0.118561  
O 2.373411 3.586456 0.205856  
O 2.682466 0.610206 0.053479  
O -0.271846 2.026249 0.051111  
O -2.905205 2.401333 1.191323  
O -2.676522 2.445814 -1.506281  
O -2.413597 -0.108094 -0.176044  
Mo 2.942955 -1.327521 -0.060329  
O 3.593733 -1.699942 -1.581789  
O 4.013254 -1.826623 1.157055  
H 0.110392 -2.481035 -0.442616  
O 1.375702 -2.074092 0.149683

[HMo<sub>4</sub>O<sub>12</sub>]<sup>II</sup> 3/4  
E = -32028.09  
Mo -0.747626 1.883361 -0.622063  
O 0.051920 0.403698 -1.239367  
O 0.257215 2.673760 0.508218  
O -1.137685 2.944258 -1.869640  
Mo -2.763214 -0.530938 0.789532  
Mo 0.261104 -1.628442 -0.937285  
O 0.374635 -2.750876 -2.164282  
O 1.886810 -1.353881 0.140920  
O -1.492896 -1.587790 0.036163  
O -4.304211 -0.952973 0.254855  
O -2.721361 -0.640776 2.470609  
O -2.299813 1.222670 0.229821  
Mo 3.059321 -0.009441 0.598378  
O 4.401321 -0.664934 1.380074  
O 3.572935 0.798838 -0.788611  
H 1.594240 1.848519 1.416411  
O 2.211528 1.175609 1.764242

[HMo<sub>4</sub>O<sub>12</sub>]<sup>III</sup> 1/2  
E = -32027.96  
Mo 0.103968 -2.358885 0.437780  
O 3.726635 -0.025163 0.312782  
O 0.116109 -2.145161 2.102663  
O -0.125771 -3.997411 0.153927  
O -1.417696 -1.487425 -0.338439  
Mo 2.258568 -0.016279 -0.505900  
Mo -2.502052 0.017570 -0.436689  
O -3.348597 0.022351 -1.886261  
O -3.618463 0.023879 0.815889  
O 1.728795 -1.912182 -0.293776  
O 2.430782 -0.017510 -2.181219  
Mo 0.137538 2.357610 0.437479  
O 1.755286 1.887349 -0.294069  
O -0.067824 3.999383 0.152897  
O -1.398055 1.508030 -0.336713

O 0.147853 2.144328 2.102406  
H 0.650603 -0.004427 0.347142

[HMo<sub>4</sub>O<sub>12</sub>] III 3/4

E = -32027.86

Mo 0.053405 -2.036671 -0.487116  
O -4.118858 -0.047758 -0.624832  
O 0.767331 -0.578352 -1.527226  
O 0.345058 -3.520868 -1.208145  
O 1.433470 -1.514301 0.777249  
Mo -2.857581 -0.155925 0.504844  
Mo 2.603679 -0.071929 0.587588  
O 3.415719 0.087298 2.047200  
O 3.770931 -0.350105 -0.587423  
O -1.628575 -1.713726 0.058127  
O -3.304872 -0.111942 2.139919  
Mo 0.024411 2.130745 -0.448779  
O -1.314082 1.049897 0.108594  
O -0.232756 3.684289 0.142729  
O 1.669389 1.526682 0.285879  
O 0.064213 2.232562 -2.133756  
H 0.459832 -0.330690 -2.401109

[HMo<sub>4</sub>O<sub>12</sub>] IV 1/2

E = -32027.83

Mo 0.078595 2.454291 0.275643  
Mo -2.735657 0.042837 -0.377068  
Mo -0.014370 -2.447430 0.272574  
Mo 2.660253 -0.045774 -0.240451  
O 1.677495 -1.527020 0.282564  
O -0.378165 -2.924919 1.852739  
O -1.201338 1.328164 -0.250935  
O -3.763456 0.016065 1.213921  
O 4.173273 -0.072994 0.491359  
O 1.742493 1.484347 0.258593  
O -1.245982 -1.299362 -0.317366  
O -3.438136 0.081864 -1.883280  
O 0.078404 -3.799880 -0.733665  
O 2.888689 -0.063275 -1.904982  
O -0.222474 2.979266 1.853613  
O 0.180351 3.780337 -0.763994  
H -3.459732 -0.025533 2.122128

[HMo<sub>4</sub>O<sub>12</sub>] IV 3/4

E = -32027.94

Mo 0.376034 2.527600 0.081698  
Mo -2.698724 0.401293 -0.164636  
Mo -0.356119 -2.431627 0.015686  
Mo 2.653440 -0.397941 -0.053847  
O 1.414260 -1.738458 0.276449  
O -1.005453 -2.926623 1.499494  
O -1.155917 1.691097 -0.338635  
O -3.016370 -0.411394 1.553438  
O 3.887148 -0.467225 1.082090  
O 1.788828 1.239724 0.025945  
O -1.349942 -1.111613 -0.647390  
O -4.079442 0.762626 -1.045752  
O -0.326613 -3.741104 -1.047082  
O 3.341788 -0.605394 -1.570601  
O 0.290172 3.171128 1.636387  
O 0.681314 3.778626 -1.004065  
H -2.692665 -1.302801 1.723926

[HMo<sub>4</sub>O<sub>12</sub>] V 1/2

E = -32027.84

Mo 0.550231 -2.357670 -0.147041  
O 2.575060 -0.140520 1.744019  
O 0.967301 -2.635230 1.477479  
O 0.766161 -3.770070 -1.042291  
O -1.144809 -1.763910 -0.276291  
Mo 2.553800 0.521590 -0.019811  
Mo -2.716640 -0.569890 0.064249  
O -3.808170 -0.582080 -1.233051  
O -3.398540 -0.786330 1.600879  
O 1.698960 -1.008130 -0.774991  
O 4.110210 0.644481 -0.610651  
Mo -0.465870 2.482930 -0.062411  
O 1.379970 1.969660 -0.147541

O -0.852060 3.378880 -1.435401  
O -1.441120 0.974120 0.020479  
O -0.711580 3.439960 1.301639  
H 2.165010 -0.999010 1.936449

[HMo<sub>4</sub>O<sub>12</sub>] V 3/4

E = -32027.84

Mo 0.534087 -2.363722 -0.127620  
O 2.582143 -0.140908 1.727570  
O 0.965995 -2.629199 1.494993  
O 0.747617 -3.783052 -1.012198  
O -1.165225 -1.780883 -0.247364  
Mo 2.553667 0.510182 -0.040095  
Mo -2.720693 -0.550930 0.048774  
O -3.767895 -0.534553 -1.284647  
O -3.458340 -0.759760 1.560427  
O 1.674749 -1.017163 -0.774707  
O 4.106949 0.613701 -0.642016  
Mo -0.445879 2.480699 -0.045647  
O 1.401784 1.976176 -0.163622  
O -0.856554 3.378799 -1.409986  
O -1.415616 0.968101 0.050041  
O -0.673192 3.433193 1.324623  
H 2.171008 -0.997211 1.927774

[HMo<sub>4</sub>O<sub>12</sub>] VI 1/2

E = -32027.80

Mo 0.284953 2.009839 -0.592472  
O 0.554553 2.331439 -2.214886  
O 0.266048 3.448978 0.269761  
O -1.602551 1.564805 -0.554629  
Mo 2.266879 -0.156521 0.563460  
Mo -2.293691 0.214974 0.526633  
O -1.973082 0.509445 2.150608  
O -3.960900 0.265512 0.342331  
O 2.211185 1.541264 -0.033802  
O 0.323859 0.097627 0.161925  
O 2.959318 -0.116240 2.080293  
Mo -0.059095 -2.155196 -0.505803  
O 1.628468 -1.930678 0.372897  
O -0.258268 -3.814513 -0.368339  
O -1.767373 -1.529735 0.043712  
O 0.136669 -1.837557 -2.139876  
H 3.496660 -0.592848 -0.536314

[HMo<sub>4</sub>O<sub>12</sub>] VI 3/4

E = -32025.91

Mo -2.331886 0.167142 0.482488  
O -2.347660 -0.064795 2.147373  
O -3.875084 0.556640 -0.050986  
O -1.376916 1.860237 0.353528  
Mo -0.389233 -2.342588 -0.413042  
Mo 0.221637 2.346831 -0.436412  
O 0.091747 2.377061 -2.109046  
O 0.582944 3.909465 -0.056321  
O -2.253423 -1.765299 -0.041574  
O -0.818869 -0.415835 -0.751659  
O -0.311007 -3.445757 -1.647078  
Mo 2.559277 -0.387479 0.418561  
O 1.440433 -1.779468 0.084541  
O 3.921641 -0.485216 -0.563701  
O 1.627421 1.220945 0.100232  
O 3.066459 -0.426475 2.023534  
H -0.492857 -3.256056 1.021127

[HMo<sub>4</sub>O<sub>12</sub>] VII 1/2

E = -32026.44

Mo -3.489760 -1.501506 -0.340532  
O -5.023331 -2.022046 -0.695006  
O -2.296101 -2.773582 0.249886  
Mo -2.021696 1.854947 -0.218897  
Mo 0.826516 -0.043269 1.033620  
O 1.037993 0.267379 2.666421  
O 2.390223 -0.052162 0.188639  
O -0.327185 1.273460 0.293707  
O -2.699409 2.814171 0.975449  
O -1.931268 2.766993 -1.619369  
O -3.085488 0.345756 -0.496099

Mo 4.265877 -0.269305 -0.535014  
O 4.703648 1.196231 -1.295377  
O 5.312317 -0.612057 0.770181  
H -1.378062 -2.574922 0.528315  
O 4.261613 -1.555877 -1.657413  
O 0.029326 -1.540955 0.872282

[HMo<sub>4</sub>O<sub>12</sub>] VII 3/4

E = -32026.94

Mo -2.491610 -1.836439 -0.306961  
O -2.957018 -2.790378 -1.594132  
O -2.623210 -2.664422 1.422486  
Mo -2.335592 1.830148 -0.207904  
Mo 0.491986 0.100186 0.726688  
O 0.605269 0.013717 2.391106  
O 2.097813 0.091143 -0.011570  
O -0.481231 1.608989 0.265690  
O -3.187184 2.515263 1.071039  
O -2.522784 2.793646 -1.571560  
O -2.866525 0.129235 -0.511806  
Mo 4.103021 -0.058349 -0.330479  
O 4.669799 1.470629 -0.834399  
O 4.837833 -0.526164 1.137065  
H -1.814004 -2.839247 1.909016  
O 4.361638 -1.234687 -1.538938  
O -0.488622 -1.238687 0.159334

[MoO<sub>3</sub>] I 1/2

E = -7992.37

Mo 0.163696 -0.091196 -0.000117  
O -1.293047 1.185225 0.000090  
O -1.814632 -0.787418 0.000236  
O 2.248275 0.080974 0.000287

[MoO<sub>3</sub>] I 3/4

E = -8002.08

Mo -0.000092 -0.000033 -0.116213  
O 1.092680 1.303483 0.203317  
O 0.582998 -1.597556 0.203372  
O -1.675196 0.294245 0.203428

[MoO<sub>3</sub>] I 5/6

E = -7999.13

Mo -0.060565 0.000218 0.000033  
O -0.819135 1.559214 -0.000062  
O 1.976997 -0.011809 -0.000047  
O -0.839897 -1.548550 -0.000062

[MoO<sub>3</sub>] I 7/8

E = -7995.59

Mo -0.000024 0.005276 0.000240  
O 0.000488 -1.730501 -0.000413  
O -1.855852 0.851090 -0.000423  
O 1.855488 0.851713 -0.000423

[Mo<sub>3</sub>O<sub>10</sub>] I 1/2

E = -26054.87

Mo 1.931572 0.000551 0.038577  
O 0.962546 1.584429 0.394374  
O 0.963594 -1.584003 0.394159  
O 2.622070 0.000897 -1.492986  
O 3.211971 0.000919 1.125220  
Mo -0.926925 1.611618 -0.013891  
O -1.325455 2.845439 -1.078174  
O -0.317142 -0.000133 -1.125851  
Mo -0.925922 -1.612161 -0.013907  
O -2.128473 -0.000622 -0.201199  
O -1.538545 -2.023327 1.502989  
O -1.539970 2.022679 1.502878  
O -1.323898 -2.846316 -1.077994

[Mo<sub>3</sub>O<sub>10</sub>] I 3/4

E = -26052.11

Mo -0.000432 1.728459 -0.068871  
O -1.787919 0.990562 0.366928

O 1.787376 0.991233 0.367183  
O -0.000290 3.024802 -1.113264  
O -0.001648 2.288609 1.814726  
Mo -1.744215 -0.835701 -0.020211  
O -2.770432 -1.232133 -1.288184  
O 0.000027 -0.083379 -1.018324  
Mo 1.744717 -0.834926 -0.020054  
O 0.000480 -1.891195 0.012344  
O 2.362858 -1.580207 1.359832  
O -2.361982 -1.581180 1.359750  
O 2.771159 -1.230724 -1.288027

[Mo<sub>3</sub>O<sub>10</sub>] II 1/2  
E = -26054.55

Mo 2.049985 -0.000629 -0.198273  
O 0.588564 1.386482 -0.102415  
O 0.588027 -1.386987 -0.099366  
O 2.719101 -0.002283 -1.721573  
O 3.164397 0.721992 1.163198  
Mo -1.184160 1.722315 0.026686  
O -1.550164 2.555631 1.446945  
O -1.734260 2.622423 -1.289789  
O -1.975991 0.000505 0.042110  
Mo -1.185110 -1.721740 0.026989  
O -1.733964 -2.620733 -1.290755  
O -1.553617 -2.555724 1.446216  
O 3.164150 -0.721020 1.164567

[Mo<sub>3</sub>O<sub>10</sub>] II 3/4  
E = -26052.58

Mo 1.962570 -0.590684 -0.240782  
O 0.889060 1.178214 -0.319091  
O 0.220959 -1.591149 -0.140859  
O 2.966393 -1.212077 -1.429942  
O 3.481276 0.402173 0.929512  
Mo -0.735295 1.910319 -0.094718  
O -0.842438 2.729144 1.379655  
O -1.101509 2.984500 -1.347251  
O -1.913381 0.413324 -0.102178  
Mo -1.570546 -1.432199 0.091153  
O -2.418327 -2.333570 -1.056516  
O -2.022333 -1.953680 1.632387  
O 2.542468 -0.025917 1.737103

[Mo<sub>3</sub>O<sub>10</sub>] III 1/2  
E = -26054.41

Mo 3.209210 -0.659796 -0.009221  
O 1.491835 0.378248 -0.098984  
O -3.420623 -1.346093 -1.525739  
O 2.922724 -2.185126 -0.726360  
O 3.647563 -0.842555 1.632162  
Mo 0.009000 1.371142 0.011842  
O 0.008422 2.301504 1.411515  
O -0.117137 2.410852 -1.302833  
O -1.534986 0.173785 0.037816  
Mo -3.162735 -0.628718 -0.027181  
O -4.416460 0.442499 0.306935  
O -3.291367 -2.004433 1.257053  
O 4.418782 0.193922 -0.862626

[Mo<sub>3</sub>O<sub>10</sub>] III 3/4  
E = -26051.82

Mo -2.605127 -0.855159 -0.000008  
O -1.416408 0.498195 -0.000193  
O 2.474029 -1.804393 1.393853  
O -2.472043 -1.805454 1.392897  
O -2.474111 -1.804180 -1.394009  
Mo -0.000009 1.895138 -0.000003  
O 0.000126 2.799821 -1.435371  
O -0.000049 2.799832 1.435360  
O 1.416241 0.498039 0.000183  
Mo 2.605130 -0.855170 -0.000006  
O 4.382721 -0.173306 -0.000965  
O 2.472311 -1.805305 -1.393052  
O -4.382785 -0.173494 0.001387

[CH<sub>3</sub>Mo<sub>2</sub>O<sub>7</sub>] I 1/2

E = -19133.78  
O 2.736860 -1.417600 0.105661  
O 2.570092 0.819029 -1.465066  
Mo 2.078345 0.116338 -0.025430  
O 0.214549 0.059581 0.076284  
O -2.604161 1.058444 -0.561204  
O -2.146512 -0.833847 1.541145  
Mo -1.623307 -0.391579 0.015702  
O 2.806130 1.154934 1.362662  
O -1.866610 -1.681588 -1.019390  
C -3.561981 1.953765 -0.032741  
H -4.480925 1.868052 -0.613348  
H -3.173571 2.969251 -0.118256  
H -3.767997 1.728583 1.015887

[CH<sub>3</sub>Mo<sub>2</sub>O<sub>7</sub>] I 3/4  
E = -19130.52

O 2.448960 -0.843308 1.451360  
O 2.731466 -0.842692 -1.297657  
Mo 1.886093 -0.200853 0.002865  
O 0.078973 -0.394318 -0.188686  
O -1.392575 1.673531 -0.730904  
O -2.443352 -0.253858 1.591044  
Mo -1.881350 -0.332566 0.004150  
O 2.212227 1.679601 0.076281  
O -2.748112 -1.335765 -1.030891  
C -0.880836 2.683605 0.022628  
H -1.020628 3.643308 -0.485098  
H 0.228549 2.521359 0.029281  
H -1.222802 2.671794 1.061070

[CH<sub>2</sub>O] I 1/2  
E = -3115.29

C 0.000000 -0.524279 0.000000  
O -0.000000 0.670794 -0.000000  
H 0.939280 -1.110338 0.000000  
H -0.939280 -1.110338 0.000000

[CH<sub>2</sub>O] I 3/4  
E = -3112.38

C -0.048886 0.593453 -0.000000  
O -0.048886 -0.704649 0.000000  
H 0.342205 1.038239 0.924402  
H 0.342205 1.038239 -0.924402

[HMo<sub>4</sub>O<sub>13</sub>] I 1/2  
E = -34076.89

Mo 2.393277 -0.050816 -0.059357  
O 0.058685 2.740744 1.580854  
O 2.741096 -0.058185 1.580889  
O 3.874633 -0.082220 -0.844883  
O 1.605460 -1.674830 -0.631400  
Mo 0.050886 2.392434 -0.059256  
Mo -0.050761 -2.392481 -0.059254  
O -0.082282 -3.873659 -0.845129  
O -0.058127 -2.740722 1.580881  
O 1.675113 1.604992 -0.631636  
O 0.000085 0.000244 0.628561  
O 0.082211 3.873624 -0.845118  
Mo -2.393444 0.050821 -0.059307  
O -1.605436 1.674780 -0.631145  
O -3.874592 0.082281 -0.845224  
O -1.675048 -1.604998 -0.631288  
O -2.741676 0.058170 1.580839  
H 0.000842 0.000029 1.591701

[HMo<sub>4</sub>O<sub>13</sub>] I 3/4  
E = -34073.75

Mo -0.002605 -2.318594 -0.075196  
O 2.861126 -0.132291 1.451632  
O -0.004159 -2.452246 1.827898  
O -0.004963 -4.003340 -0.133730  
O -1.616036 -1.586265 -0.804480  
Mo 2.432053 -0.021036 -0.166093  
Mo -2.432244 -0.015535 -0.165998  
O -3.871190 0.050481 -1.025371  
O -2.860326 -0.126003 1.452044

O 1.612621 -1.590468 -0.804202  
O 0.000416 -0.119417 0.694903  
O 3.870570 0.041547 -1.026438  
Mo 0.002854 2.381195 0.060824  
O 1.612770 1.639961 -0.580163  
O 0.004376 3.926897 -0.587109  
O -1.608614 1.643177 -0.580107  
O 0.003121 2.580434 1.727008  
H -0.000126 -0.072988 1.656411

[HMo<sub>4</sub>O<sub>13</sub>] II 1/2  
E = -34076.67

Mo -0.037860 2.163649 -0.212015  
O -3.593292 -0.402035 1.701816  
O -0.326319 3.757456 0.216122  
O -0.031254 2.141288 -1.886486  
O 1.701732 1.905031 0.465151  
Mo -2.782047 -0.105836 0.258067  
Mo 2.508463 0.173294 0.283666  
O 3.698217 0.416553 -0.874020  
O 3.225645 -0.082425 1.786286  
O -1.633823 1.336366 0.464427  
O 0.582591 -0.194370 -0.182192  
O -3.926935 0.190585 -0.937503  
Mo 0.123812 -2.088071 -0.285002  
Mo -1.728349 -1.549913 -0.207917  
O 0.230925 -2.891115 -1.752135  
O 2.247584 -1.864858 -0.068841  
O 0.201063 -3.202360 0.977917  
H 2.698297 -2.489088 0.500926

[HMo<sub>4</sub>O<sub>13</sub>] II 3/4  
E = -34074.19

Mo -0.074656 2.187801 0.314069  
O 3.357101 -0.207543 -1.905621  
O 0.163290 3.775849 -0.163481  
O -0.137463 2.236540 1.985996  
O -1.789583 1.854133 -0.435842  
Mo 2.723318 -0.047621 -0.354329  
Mo -2.437547 0.065531 -0.406674  
O -3.802153 0.099347 0.569521  
O -2.885875 -0.227994 -2.004687  
O 1.556543 1.402778 -0.298238  
O -0.611932 -0.156469 0.370954  
O 4.002092 0.173541 0.716825  
Mo -0.088313 -2.028045 0.501397  
O 1.765646 -1.549349 0.109660  
O -0.106578 -2.703870 2.017021  
O -2.045215 -2.034808 -0.143618  
O 0.181105 -3.266698 -0.999211  
H -2.333491 -2.625647 -0.841664

[HMo<sub>4</sub>O<sub>13</sub>] III 1/2  
E = -34076.53

Mo -0.211296 2.005208 0.492970  
Mo -2.839264 -0.099590 -0.461850  
Mo 0.457619 -2.028819 0.536200  
Mo 2.839300 0.223229 -0.559841  
O 2.181401 -1.454415 -0.102310  
O 0.586031 -2.690748 2.083299  
O -1.833663 1.527054 -0.296447  
O -4.217142 0.447910 -1.243138  
O 4.162495 0.620004 0.394721  
O 1.433341 1.400509 -0.283258  
O -0.513962 -0.563909 0.512907  
O -2.239764 -1.434271 -1.624383  
O -3.356897 -0.709062 1.009228  
O -0.271645 -3.152140 -0.524924  
O 3.328963 0.250139 -2.166112  
O -0.216122 1.850018 2.157378  
O -0.130652 3.652595 0.210173  
H -1.646126 -2.150669 -1.331176

[HMo<sub>4</sub>O<sub>13</sub>] III 3/4  
E = -34073.38

Mo 0.212367 -2.174901 0.387160  
Mo 2.826462 0.105693 -0.343425  
Mo -0.480877 2.347258 0.384630

Mo -2.748099 -0.303630 -0.461531  
 O -1.957528 1.349236 -0.480930  
 O -0.875439 3.185190 1.796858  
 O 1.829454 -1.497606 -0.310330  
 O 4.409941 -0.322149 -0.696726  
 O -3.759680 -0.455895 0.871427  
 O -1.412712 -1.630366 -0.410101  
 O 0.088862 0.423133 0.618398  
 O 2.270096 1.263130 -1.675225  
 O 2.823177 0.861614 1.156359  
 O 0.588895 3.129419 -0.713852  
 O -3.677318 -0.496787 -1.850379  
 O 0.171316 -2.129203 2.057326  
 O 0.288483 -3.799368 -0.006033  
 H 1.685797 2.031626 -1.461383

[HMo<sub>4</sub>O<sub>13</sub>] IV 1/2  
 E = -34076.46

Mo 0.343039 -1.955347 -0.857073  
 O 1.378818 0.414192 2.013420  
 O 0.356320 -3.614903 -0.639029  
 O 0.219875 -1.741466 -2.511600  
 O -1.252460 -1.453243 0.076563  
 Mo 2.462385 0.187362 0.750920  
 Mo -2.478118 -0.304181 0.868230  
 O -4.026209 -0.631726 0.307530  
 O -2.496386 -0.473271 2.536524  
 O 2.005788 -1.434296 -0.171262  
 O 0.546971 0.573656 -0.765416  
 O 3.922820 -0.259630 1.440203  
 Mo -0.536726 1.968471 -0.778215  
 O 2.926242 1.837282 -0.016925  
 O -1.127726 2.273792 -2.329215  
 O -1.972281 1.424074 0.378133  
 O 0.339334 3.317389 -0.218049  
 H 2.226850 2.500339 -0.129207

[HMo<sub>4</sub>O<sub>13</sub>] IV 3/4  
 E = -34073.16

Mo -1.175779 1.503740 -1.151773  
 O -0.318298 -0.318389 1.727182  
 O -1.940526 2.989866 -1.002636  
 O -1.046461 1.271003 -2.805697  
 O 0.442283 1.750551 -0.256196  
 Mo -1.738434 -0.938168 0.990673  
 Mo 1.721211 1.167608 1.056552  
 O 2.991107 2.224517 0.844379  
 O 1.260176 1.099906 2.901301  
 O -2.390925 0.363680 -0.189129  
 O -0.317319 -0.849972 -1.035864  
 O -2.929893 -0.978524 2.161852  
 Mo 1.296437 -1.574128 -0.968799  
 O -1.591825 -2.752264 0.588557  
 O 2.048751 -1.634424 -2.481502  
 O 2.251166 -0.464598 0.236778  
 O 1.092515 -3.151544 -0.330486  
 H -0.750294 -3.078633 0.212296

[HMo<sub>4</sub>O<sub>13</sub>] V 1/2  
 E = -34076.40

Mo 2.219446 -0.093526 0.602196  
 O 0.041104 3.734637 -0.133527  
 O 2.352143 -0.266969 2.250045  
 O 3.971213 0.134333 -0.050772  
 O 1.918827 -1.761818 -0.078493  
 Mo 0.089415 2.096128 -0.494766  
 Mo -0.012210 -2.024976 -0.571419  
 O 0.165680 -2.410483 -2.192860  
 O -0.217557 -3.438189 0.308977  
 O 1.823198 1.723856 0.268388  
 O 0.281217 -0.075637 0.115177  
 O 0.263628 1.974818 -2.158189  
 Mo -2.510470 0.041545 0.472852  
 O -1.726339 1.645482 -0.078398  
 O -4.169536 0.144507 0.220053  
 O -1.845597 -1.368737 -0.524417  
 O -2.254882 -0.208766 2.117461  
 H 4.155636 0.578576 -0.879805

[HMo<sub>4</sub>O<sub>13</sub>] V 3/4  
 E = -34074.28

Mo 0.251533 -2.223223 -0.550280  
 O -4.058940 -0.114218 -0.432910  
 O 0.213426 -3.161792 -1.919050  
 O 0.120065 -3.263202 1.050590  
 O 2.169017 -1.745238 -0.147710  
 Mo -2.585731 -0.194300 0.376470  
 Mo 2.360012 0.137960 0.458810  
 O 2.445400 -0.136870 2.112700  
 O 3.892655 0.504248 -0.115310  
 O -1.617082 -1.607398 -0.224310  
 O 0.767028 -0.331837 -0.765000  
 O -2.895962 -0.381298 2.022450  
 Mo -0.110860 2.445960 -0.367320  
 O -1.586658 1.380712 0.111690  
 O -0.403537 4.008102 0.170310  
 O 1.453206 1.864238 0.425970  
 O 0.043091 2.523229 -2.036170  
 H -0.761795 -3.298105 1.431340

[HMo<sub>4</sub>O<sub>13</sub>] VI 1/2  
 E = -34076.28

Mo 2.581126 -1.771554 -0.170354  
 O 1.027775 -2.482724 0.194118  
 O 3.779096 -2.388493 0.857971  
 O 3.011066 -2.065502 -1.783256  
 Mo 1.864831 1.888661 0.254832  
 Mo -1.851335 1.875519 -0.270977  
 O -2.270018 2.581990 -1.731690  
 O -2.630652 2.728297 0.942009  
 O -2.386644 0.101954 -0.257004  
 O -0.007577 1.962604 -0.024378  
 O 2.641136 2.864892 -0.867743  
 O 2.232079 2.477418 1.782466  
 O 2.408767 0.164519 0.089627  
 Mo -2.581622 -1.745699 0.181885  
 O -2.447509 -1.914888 1.846563  
 O -4.093126 -2.300382 -0.299927  
 O -1.293245 -2.688314 -0.681940  
 H -0.315204 -2.701882 -0.340732

[HMo<sub>4</sub>O<sub>13</sub>] VI 3/4  
 E = -34073.12

Mo 2.664635 -1.572677 -0.402361  
 O 1.182327 -2.416199 -0.074675  
 O 3.870281 -1.593548 1.147315  
 O 3.606993 -2.019233 -1.735408  
 Mo 1.665204 1.880933 0.444320  
 Mo -1.934232 1.764449 -0.493596  
 O -2.350972 2.261917 -2.040209  
 O -2.834488 2.671456 0.591481  
 O -2.323122 -0.047250 -0.290558  
 O -0.128283 2.037234 -0.213437  
 O 2.567079 3.232988 0.006891  
 O 1.617670 1.768889 2.121727  
 O 2.357657 0.383672 -0.288569  
 Mo -2.434150 -1.835902 0.330202  
 O -2.076469 -1.861247 1.968464  
 O -3.988605 -2.432046 0.109051  
 O -1.263320 -2.876642 -0.614190  
 H -0.275222 -2.825629 -0.402765

[HMo<sub>4</sub>O<sub>13</sub>] VII 1/2  
 E = -34076.22

Mo 0.165102 1.864782 -0.178049  
 O -3.910022 0.000185 1.626477  
 O 0.119220 3.110054 0.946402  
 O -0.275774 2.428186 -1.699070  
 O 2.059685 1.594836 -0.441684  
 Mo -2.978644 -0.000224 0.227522  
 Mo 2.859961 0.000626 0.145137  
 O 4.423544 0.000684 -0.467729  
 O 2.994983 0.000867 1.821487  
 O -1.945741 1.405653 0.187594  
 O 0.218652 -0.000324 0.358568  
 O -4.126901 -0.000134 -1.267019  
 Mo 0.166829 -1.865303 -0.178113

O -1.946401 -1.406080 0.188629  
 O -0.275873 -2.428377 -1.698733  
 O 2.060256 -1.594643 -0.441624  
 O 0.119749 -3.110433 0.946461  
 H -5.079441 0.001217 -1.170948

[HMo<sub>4</sub>O<sub>13</sub>] VII 3/4  
 E = -34074.16

Mo -0.806949 1.973852 -0.426327  
 O 2.778415 -0.240014 2.139144  
 O -1.254770 3.135151 -1.557307  
 O 0.318852 2.646530 0.659712  
 O -2.305621 1.274805 0.483315  
 Mo 3.186805 0.012618 0.528241  
 Mo -2.873497 -0.529297 0.693856  
 O -2.909039 -0.942624 2.323310  
 O -4.412489 -0.756951 0.053054  
 O 4.800065 -0.403847 0.286684  
 O -0.092424 0.527628 -1.219934  
 O 2.975567 1.825119 0.115571  
 Mo 0.232840 -1.456952 -0.942999  
 O 2.086932 -0.995743 -0.558903  
 O 0.532305 -2.581261 0.598904  
 O -1.633474 -1.488544 -0.229803  
 O 0.212222 -2.287296 -2.375317  
 H 2.181294 2.287085 0.436225

[HMo<sub>4</sub>O<sub>13</sub>] VIII 1/2  
 E = -34075.72

Mo 3.309397 -1.415227 0.285991  
 O 3.650486 -1.510800 -1.351194  
 O 1.878204 -2.501294 0.726612  
 O 4.655861 -1.917127 1.145598  
 Mo 1.891195 1.917234 0.285705  
 Mo -0.878447 -0.001375 -1.082086  
 O -0.047676 -1.476396 -0.879763  
 O -1.081429 0.270948 -2.721707  
 O -2.449374 -0.029320 -0.254013  
 O 0.234568 1.359239 -0.347180  
 O 2.691053 2.815846 -0.877245  
 O 1.718120 2.879881 1.642154  
 O 2.874623 0.377749 0.706386  
 Mo -4.302583 -0.290195 0.515142  
 O -4.539581 0.910346 1.706654  
 O -5.444550 -1.129560 -0.743594  
 O -4.378353 -1.851399 1.202597  
 H 1.082802 -2.423208 0.157961

[HMo<sub>4</sub>O<sub>13</sub>] VIII 3/4  
 E = -34073.43

Mo -3.027686 0.298415 -0.789873  
 O -3.987703 -0.754431 0.099163  
 O -2.016453 -0.626316 -2.013450  
 O -4.021810 1.380817 -1.599994  
 Mo -0.386878 0.949334 1.524400  
 Mo 0.679907 -2.158360 0.310341  
 O -0.473257 -2.461663 -0.939263  
 O 1.383018 -3.497387 1.058350  
 O 1.971228 -0.797806 -0.209717  
 O -0.096540 -0.824900 1.614183  
 O -0.665368 1.579551 3.054204  
 O 0.981080 1.704309 0.835928  
 O -1.879353 1.203474 0.407163  
 Mo 2.678467 0.790107 -0.833857  
 O 3.489238 1.985098 0.396519  
 O 4.117536 0.387451 -1.629196  
 O 1.677889 1.531575 -1.965154  
 H -1.476047 -1.417042 -1.732376

[HMo<sub>4</sub>O<sub>13</sub>] IX 1/2  
 E = -34075.72

Mo -0.899618 -0.039177 0.923653  
 Mo -4.385072 -0.294129 -0.472736  
 Mo 1.923425 1.937383 -0.209446  
 Mo 3.381104 -1.410765 -0.285988  
 O 3.064488 0.453055 -0.258733  
 O 1.944633 2.752949 -1.669286  
 O -2.422724 -0.184089 0.021416



O -5.110641 -1.499366 0.495011  
 O 2.579594 -2.175798 1.196374  
 O 5.023057 -1.735259 -0.237350  
 O 0.214814 1.308959 0.166557  
 O -5.090696 1.231569 -0.170895  
 O -4.498380 -0.694477 -2.128222  
 O 2.436802 3.001473 0.975881  
 O 2.752178 -2.043221 -1.702744  
 O -0.008450 -1.492535 0.865584  
 O -1.188572 0.336336 2.529640  
 H 1.597926 -2.195913 1.203829

[HMo<sub>4</sub>O<sub>13</sub>] IX 3/4

E = -34073.48

Mo 0.858316 1.763327 -1.275840  
 Mo 2.122110 -0.937136 0.727502  
 Mo -1.520258 1.106125 1.353479  
 Mo -1.470991 -1.709153 -0.783919  
 O -1.964577 -0.621531 0.628485  
 O -1.348291 1.139907 3.020837  
 O 2.037619 0.350804 -0.572262  
 O 2.505558 -2.709420 0.165516  
 O -1.900279 -0.873350 -2.363895  
 O -2.263537 -3.184296 -0.717867  
 O -0.071673 1.774037 0.481772  
 O 3.546002 -0.679899 1.597090  
 O 0.823595 -0.811695 1.809004  
 O -2.840229 2.080637 0.989311  
 O 0.214471 -1.940490 -0.711586  
 O -0.224165 1.139068 -2.474482  
 O 1.704995 3.177322 -1.640266  
 H -1.301364 -0.101621 -2.584595

[HMo<sub>4</sub>O<sub>13</sub>] X 1/2

E = -34075.57

Mo -0.600486 -0.629116 -0.815190  
 Mo -3.859443 0.142422 0.385989  
 Mo 1.895992 1.959328 -0.012117  
 Mo 2.837690 -1.301114 0.421806  
 O 3.098258 0.580444 0.440727  
 O 2.448247 2.826407 -1.339842  
 O -2.153870 0.268000 -0.612773  
 O -5.207768 0.384303 -0.620011  
 O 3.960149 -2.069145 -0.566601  
 O 1.151392 -1.434271 -0.238785  
 O 0.350123 1.042669 -0.397245  
 O -3.718684 -1.511471 0.905341  
 O -3.897729 1.211652 1.706464  
 O 1.689973 3.026661 1.265886  
 O 2.962192 -1.941201 1.971058  
 O -0.508220 -0.908671 -2.444764  
 O -1.332162 -2.115435 -0.019154  
 H -2.232828 -2.083428 0.417098

[HMo<sub>4</sub>O<sub>13</sub>] X 3/4

E = -34073.93

Mo 0.315671 -1.363882 0.522331  
 Mo 3.595581 0.113399 -0.282709  
 Mo -1.068810 2.004218 0.180901  
 Mo -3.160699 -0.641402 -0.362189  
 O -2.743810 1.201238 -0.178159  
 O -1.114130 2.809758 1.657691  
 O 2.216231 -1.029112 -0.027559  
 O 3.738460 1.234869 0.970961  
 O -4.504619 -1.062512 0.563101  
 O -1.661289 -1.464542 0.228441  
 O 0.098461 0.602528 0.215481  
 O 5.232751 -0.848181 -0.332719  
 O 3.487071 0.898839 -1.775089  
 O -0.666760 3.108358 -1.022839  
 O -3.473249 -1.005552 -1.977899  
 O 0.457521 -1.769832 2.117371  
 O 0.437311 -2.883132 -0.629709  
 H 1.335231 -3.059782 -0.922699

[HMo<sub>4</sub>O<sub>13</sub>] XI 1/2

E = -34075.48

Mo -4.136154 0.088309 -0.149872

O -4.360973 -0.080849 -1.830244  
 O -4.833978 1.541755 0.417641  
 O -4.742144 -1.263979 0.690625  
 Mo -0.465553 -0.945209 0.273987  
 Mo 3.162963 -1.123153 -0.184414  
 O 3.882852 -1.711569 -1.581298  
 O 3.962707 -1.781157 1.135770  
 O 3.208090 0.761045 -0.127720  
 O 1.363539 -1.491794 -0.144959  
 O -1.264009 -1.917514 -0.822799  
 O -0.676483 -1.602575 1.788457  
 O -2.125927 0.323601 0.274705  
 Mo 1.787417 2.008023 0.035694  
 O 0.318704 0.945632 0.244030  
 O 2.005074 3.015757 1.361744  
 O 1.665585 2.962448 -1.340811  
 H -1.868550 1.218839 0.512282

[HMo<sub>4</sub>O<sub>13</sub>] XI 3/4

E = -34073.14

Mo 4.150066 0.051253 0.276840  
 O 4.471157 -0.315728 1.908812  
 O 4.972939 1.471989 -0.194713  
 O 4.516948 -1.263242 -0.743885  
 Mo 0.491568 -0.538399 -0.657174  
 Mo -2.911803 -1.388219 0.276511  
 O -3.047821 -2.050583 1.812690  
 O -4.002901 -2.165168 -0.735562  
 O -3.230075 0.478332 0.329014  
 O -1.200047 -1.496005 -0.369206  
 O 1.118088 -1.893139 0.576816  
 O 0.833308 -0.780575 -2.252308  
 O 2.139615 0.492821 0.035909  
 Mo -2.070101 1.944356 0.050808  
 O -0.428287 1.183058 -0.251199  
 O -2.570161 2.856001 -1.267778  
 O -2.024072 2.944800 1.399103  
 H 1.901809 1.401884 0.245113

[HMo<sub>4</sub>O<sub>13</sub>] XII 1/2

E = -34075.16

Mo 3.994251 -1.048712 -0.116624  
 O 2.159675 -1.051991 -0.046070  
 O 4.751908 -1.880701 1.143489  
 O 4.643384 -1.525152 -1.601794  
 Mo 1.912268 1.001330 0.243292  
 Mo -1.912267 1.001128 -0.243405  
 O -1.718032 1.614067 -1.785690  
 O -1.659161 2.224939 0.870450  
 O -3.863055 0.798089 -0.124695  
 O 0.000046 0.231559 -0.000540  
 O 1.658385 2.225726 -0.869716  
 O 1.717931 1.613373 1.785888  
 O 3.863160 0.798175 0.124682  
 Mo -3.994174 -1.048758 0.116555  
 O -4.641742 -1.524234 1.602694  
 O -4.753353 -1.881234 -1.142332  
 O -2.159556 -1.052190 0.044607  
 H -0.000032 -0.732910 -0.000198

[HMo<sub>4</sub>O<sub>13</sub>] XII 3/4

E = -34072.69

Mo 4.118526 -0.906076 -0.153591  
 O 2.298824 -1.091987 -0.011267  
 O 5.009463 -1.712742 1.033296  
 O 4.740018 -1.254461 -1.685120  
 Mo 1.874005 0.919853 0.387945  
 Mo -1.830938 0.688764 -0.527181  
 O -1.703371 1.104275 -2.123508  
 O -1.531840 2.151914 0.725114  
 O -3.702685 0.979092 0.075237  
 O 0.043107 0.016683 0.005156  
 O 1.457210 2.228550 -0.573710  
 O 1.665936 1.332199 1.991557  
 O 3.820899 0.911089 0.177102  
 Mo -4.137384 -0.826178 0.234638  
 O -4.609317 -1.306152 1.783719  
 O -5.259897 -1.369438 -0.905131  
 O -2.372453 -1.222050 -0.187459

H 0.136102 -0.943023 0.004078

[HMo<sub>4</sub>O<sub>13</sub>] XIII 1/2

E = -34075.48

Mo -0.465557 -0.945351 -0.274223  
 Mo -4.136009 0.088370 0.150013  
 Mo 1.787366 2.008025 -0.035741  
 Mo 3.162839 -1.123105 0.184609  
 O 3.208061 0.761065 0.128066  
 O 2.005228 3.015644 -1.361842  
 O -2.125775 0.323529 -0.274842  
 O -4.742502 -1.263423 -0.690905  
 O 3.962616 -1.781025 -1.135609  
 O 1.363410 -1.491930 0.145055  
 O 0.318787 0.945552 -0.244235  
 O -4.360602 -0.081367 -1.830360  
 O -4.833519 1.542215 -0.416849  
 O 1.665291 2.962555 1.340674  
 O 3.882743 -1.711561 1.581463  
 O -0.676217 -1.602373 -1.788870  
 O -1.264331 -1.917913 0.822120  
 H -1.868369 1.218777 -0.512332

[HMo<sub>4</sub>O<sub>13</sub>] XIII 3/4

E = -34073.14

Mo -0.491568 -0.538285 -0.657225  
 Mo -4.150091 0.051226 0.276834  
 Mo 2.070204 1.944309 0.050849  
 Mo 2.911742 -1.388299 0.276491  
 O 3.230125 0.478241 0.329018  
 O 2.570308 2.855979 -1.267702  
 O -2.139664 0.492892 0.035788  
 O -4.517320 -1.262463 -0.744802  
 O 4.002914 -1.265297 -0.735469  
 O 1.200038 -1.495962 -0.369347  
 O 0.428361 1.183078 -0.251199  
 O -4.470851 -0.316986 1.908593  
 O -4.972906 1.472431 -0.193458  
 O 2.024192 2.944710 1.399175  
 O 3.047562 -2.050684 1.812677  
 O -0.833255 -0.780441 -2.252372  
 O -1.118270 -1.892740 0.576976  
 H -1.901950 1.401952 0.245109

[HMo<sub>2</sub>O<sub>7</sub>] I 1/2

E = -8017.96

Mo 0.053131 -0.003588 0.000218  
 O 1.103621 -1.358560 -0.000397  
 O 0.788059 1.547935 -0.000389  
 O -1.866186 -0.236913 -0.000335  
 H -2.435453 0.530999 -0.000191

[HMo<sub>2</sub>O<sub>7</sub>] I 3/4

E = -8017.59

Mo 0.082986 -0.000008 -0.006623  
 O 0.892491 -1.533738 0.020024  
 O 0.893337 1.533326 0.020003  
 O -1.922978 0.000356 -0.097604  
 H -2.388202 0.000807 0.738783

[HMo<sub>2</sub>O<sub>7</sub>] I 1/2

E = -18065.11

Mo 1.883743 0.017323 0.027410  
 Mo -1.854208 -0.054323 -0.017964  
 O 0.020551 0.132479 -0.106838  
 O -2.666456 1.618731 -0.181078  
 O -2.378940 -1.038071 -1.259346  
 O 2.350223 -1.480018 0.611580  
 O 2.712703 0.246344 -1.642995  
 O -2.279865 -0.768952 1.428729  
 O 2.472274 1.219678 1.034496  
 H -3.084407 2.112459 0.526879

[HMo<sub>2</sub>O<sub>7</sub>] I 3/4

E = -18059.67

Mo 1.869633 -0.003020 0.015650

Mo -1.882085 0.006398 -0.016879  
 O 0.001962 0.000006 -0.169915  
 O -2.194297 1.593420 0.812353  
 O -2.659576 0.068678 -1.480166  
 O 2.392301 -1.455747 0.661214  
 O 2.729173 0.214132 -1.640586  
 O -2.180256 -1.693529 0.668540  
 O 2.365282 1.256886 0.999354  
 H -3.113718 -0.012636 1.245279

[HMo<sub>2</sub>O<sub>7</sub>] II 1/2  
 E = -18064.41

O -2.622508 1.271592 -0.046005  
 O -2.455019 -1.454785 0.151476  
 Mo -1.580167 -0.033286 0.033146  
 O -0.213000 -0.038662 -1.234754  
 O 2.645625 -0.638024 1.080990  
 O 1.874073 1.641425 -0.285849  
 Mo 1.325678 0.112548 0.010267  
 O -0.118997 0.132401 1.245688  
 O 1.873197 -1.134588 -1.297861  
 H 2.821549 -1.563861 1.267199

[HMo<sub>2</sub>O<sub>7</sub>] III 3/4  
 E = -18062.20

O -2.612343 1.249508 -0.066784  
 O -2.445661 -1.493659 0.034569  
 Mo -1.571475 -0.062516 -0.006760  
 O -0.162927 -0.030278 -1.268352  
 O 2.415322 -1.105653 0.940159  
 O 1.900524 1.752526 0.047278  
 Mo 1.270700 0.232181 0.017962  
 O -0.207831 0.050122 1.284556  
 O 2.433045 -1.072410 -1.194049  
 H 2.071524 -1.927215 1.310478

[CH<sub>3</sub>Mo<sub>2</sub>O<sub>5</sub>] I 1/2  
 E = -15039.61

Mo -1.392235 -0.142449 -0.086777  
 Mo 1.446283 0.035129 0.012022  
 O -0.002489 0.032665 1.233198  
 O 0.098449 -0.045636 -1.314991  
 O -2.290134 -1.498619 0.229831  
 O 2.445587 -1.307306 0.075033  
 O 2.363001 1.437749 0.036647  
 C -2.507562 1.623718 0.113423  
 H -2.987529 1.820977 -0.856081  
 H -1.865352 2.469335 0.367442  
 H -3.287078 1.523996 0.870050

[CH<sub>3</sub>Mo<sub>2</sub>O<sub>5</sub>] I 3/4  
 E = -15037.38

Mo -1.361999 -0.269047 -0.159520  
 Mo 1.497584 0.058638 0.033388  
 O -0.016209 1.080935 0.440955  
 O 0.274497 -1.185119 -0.681304  
 O -2.649097 -1.174144 0.390896  
 O 2.356234 -0.474058 1.376033  
 O 2.536779 0.746220 -1.094669  
 C -2.833295 1.845084 0.197198  
 H -3.686403 1.443994 -0.338041  
 H -2.193551 2.575009 -0.281398  
 H -2.832484 1.796996 1.278529

[CH<sub>3</sub>Mo<sub>2</sub>O<sub>5</sub>] II 1/2  
 E = -15038.43

Mo -1.764616 0.212023 -0.000044  
 Mo 1.015895 -0.347757 0.000025  
 O -0.355137 0.014345 -1.294095  
 O -0.354967 0.014931 1.293995  
 O -3.436027 0.279510 0.000127  
 O 2.333571 0.959257 0.000069  
 O 1.428582 -1.959379 0.000243  
 C 3.715406 1.221616 -0.000188  
 H 3.965998 1.802464 0.888969  
 H 3.965339 1.803959 -0.888551  
 H 4.294339 0.295413 -0.001170

[CH<sub>3</sub>Mo<sub>2</sub>O<sub>5</sub>] II 3/4  
 E = -15038.34

Mo -1.785360 0.167592 0.000100  
 Mo 1.037678 -0.348119 -0.000023  
 O -0.367975 -0.066079 -1.286892  
 O -0.367885 -0.066737 1.287034  
 O -3.428239 0.483123 -0.000332  
 O 2.295291 1.014163 0.000107  
 O 1.533062 -1.935751 -0.000369  
 C 3.668709 1.320072 0.000054  
 H 3.899324 1.910981 0.887897  
 H 3.899904 1.907920 -0.889676  
 H 4.277101 0.413027 0.001808

[CH<sub>3</sub>Mo<sub>2</sub>O<sub>5</sub>] III 1/2  
 E = -15038.10

Mo -1.186598 -0.001021 0.026762  
 Mo 1.647317 0.000377 -0.005627  
 O 0.237418 -0.000918 1.265413  
 O 0.223442 -0.000759 -1.246963  
 O -2.998620 -0.000014 -0.117694  
 O 2.601692 -1.381296 -0.015947  
 O 2.599387 1.383637 -0.015685  
 C -4.396906 0.002344 0.008508  
 H -4.796232 -0.908920 -0.437942  
 H -4.800584 0.869590 -0.514998  
 H -4.678494 0.047112 1.061241

[CH<sub>3</sub>Mo<sub>2</sub>O<sub>5</sub>] III 3/4  
 E = -15038.30

Mo 1.201920 -0.490994 0.000006  
 Mo -1.566584 0.154430 -0.000042  
 O -0.258377 -0.265368 -1.283906  
 O -0.258112 -0.263451 1.284042  
 O 2.975379 0.016269 -0.000337  
 O -2.908192 -0.859171 0.001073  
 O -2.049448 1.766126 -0.001035  
 C 3.844952 1.125685 0.000220  
 H 4.872129 0.759525 0.017274  
 H 3.670457 1.742249 0.884127  
 H 3.693577 1.724581 -0.899898

[CH<sub>3</sub>Mo<sub>2</sub>O<sub>5</sub>] IV 1/2  
 E = -15037.98

Mo -1.606223 -0.150366 -0.000087  
 Mo 1.393812 -0.238836 0.000038  
 O -0.258342 -1.406683 -0.000278  
 O -0.102747 1.238908 -0.000106  
 O -3.260648 -0.334038 0.000384  
 O 2.284083 -0.281365 -1.433138  
 O 2.283791 -0.281422 1.433393  
 C 0.130652 2.643830 -0.000006  
 H -0.822644 3.170675 -0.000211  
 H 0.696172 2.914856 -0.891744  
 H 0.695741 2.914806 0.892022

[CH<sub>3</sub>Mo<sub>2</sub>O<sub>5</sub>] IV 3/4  
 E = -15037.75

Mo -1.665772 -0.145524 -0.168566  
 Mo 1.346939 -0.233656 0.030214  
 O -0.021281 -1.396920 -0.238701  
 O 0.050172 1.239964 -0.087321  
 O -3.118425 -0.377317 0.620132  
 O 2.512909 -0.233616 -1.178501  
 O 2.083987 -0.362262 1.533826  
 C 0.142117 2.655732 0.057419  
 H -0.822794 3.090926 -0.199517  
 H 0.907047 3.038686 -0.618167  
 H 0.395113 2.902750 1.088471

[CH<sub>3</sub>Mo<sub>2</sub>O<sub>5</sub>] V 1/2  
 E = -15037.28

Mo -1.730367 0.088241 0.001161  
 Mo 1.139962 -0.300574 -0.000345  
 O -0.137427 1.160114 0.000672

O -0.438145 -1.354301 0.001198  
 O -3.383023 0.323778 -0.004310  
 O 2.037994 -0.608395 1.387086  
 O 2.036229 -0.608430 -1.388937  
 C 2.628246 1.922038 0.000020  
 H 3.580956 1.410599 0.000557  
 H 2.260146 2.336681 0.928065  
 H 2.261407 2.336383 -0.928680

[CH<sub>3</sub>Mo<sub>2</sub>O<sub>5</sub>] V 3/4  
 E = -15037.26

Mo -1.734299 0.094279 0.001010  
 Mo 1.135070 -0.305157 -0.000191  
 O -0.128752 1.156967 0.002291  
 O -0.444849 -1.353846 -0.000285  
 O -3.386127 0.330845 -0.003651  
 O 2.034543 -0.611847 1.386408  
 O 2.031943 -0.608791 -1.389086  
 C 2.678089 1.916564 0.000025  
 H 3.623194 1.391792 0.000224  
 H 2.310407 2.329349 0.929073  
 H 2.311406 2.329747 -0.929264

[Mo<sub>3</sub>O<sub>9</sub>] I 1/2  
 E = -24009.48

Mo -2.179199 0.001154 0.000106  
 O -0.717302 1.377152 0.004057  
 O -0.718913 -1.376335 -0.001414  
 O -3.082802 -0.000447 1.436014  
 O -3.080231 0.003212 -1.437405  
 Mo 1.060068 1.718796 0.000169  
 O 1.513895 2.586696 -1.373804  
 O 1.519432 2.588214 1.371327  
 O 1.858637 -0.001008 -0.000605  
 Mo 1.058134 -1.719859 -0.000153  
 O 1.512993 -2.588169 1.373166  
 O 1.514523 -2.589791 -1.371974

[Mo<sub>3</sub>O<sub>9</sub>] I 3/4  
 E = -24006.19

Mo -2.178403 0.098668 -0.012319  
 O -0.648447 1.381078 0.068099  
 O -0.841236 -1.371085 0.302241  
 O -3.266061 0.226304 1.284495  
 O -2.871143 0.049375 -1.561498  
 Mo 1.150971 1.635231 0.037898  
 O 1.625516 2.521121 -1.319046  
 O 1.674296 2.441799 1.426260  
 O 1.862856 -0.108614 -0.017920  
 Mo 0.909997 -1.778790 0.077224  
 O 1.601462 -2.951894 1.061022  
 O 1.479288 -1.952409 -1.783368

[Mo<sub>3</sub>O<sub>9</sub>] II 1/2  
 E = -24009.21

Mo -0.000168 -0.751039 -0.000061  
 Mo -2.649572 0.369656 0.000058  
 O -1.399374 -0.085931 1.285494  
 O -1.396494 -0.080840 -1.285052  
 O -0.000795 -2.403348 0.000034  
 O -3.088540 2.005632 0.003067  
 O -4.035726 -0.605727 -0.003480  
 O 1.400323 -0.087165 -1.285715  
 O 1.396213 -0.080840 1.284777  
 Mo 2.649734 0.369463 -0.000014  
 O 4.036614 -0.604858 0.004620  
 O 3.087813 2.005658 -0.003657

[Mo<sub>3</sub>O<sub>9</sub>] II 3/4  
 E = -24006.03

Mo 0.035421 -0.815986 0.000256  
 Mo -2.702498 0.372412 -0.000160  
 O -1.381999 -0.151260 1.220414  
 O -1.378939 -0.147457 -1.219874  
 O 0.049958 -2.475047 0.001198  
 O -3.026677 2.281267 0.003672  
 O -4.037811 -0.651688 -0.004304

O 1.418149 -0.091876 -1.291758  
 O 1.414751 -0.084892 1.291281  
 Mo 2.640664 0.402902 -0.000137  
 O 4.062922 -0.523323 0.003878  
 O 3.018312 2.057806 -0.004292

[Mo<sub>2</sub>O<sub>6</sub>] I 1/2

E = -16002.82  
 Mo -1.429658 -0.000072 -0.000012  
 Mo 1.429639 -0.000174 0.000013  
 O 0.000010 -0.000603 -1.260991  
 O -0.000079 -0.000769 1.260992  
 O -2.387399 -1.366901 -0.000030  
 O -2.387346 1.366814 0.000043  
 O 2.385231 1.368138 0.000031  
 O 2.389682 -1.365387 -0.000049

[Mo<sub>2</sub>O<sub>6</sub>] I 3/4

E = -16000.11  
 Mo -1.413871 -0.019281 -0.000036  
 Mo 1.428347 0.038670 0.000067  
 O -0.008760 -0.028436 -1.278451  
 O -0.008937 -0.028603 1.278478  
 O -2.376705 -1.388262 -0.000040  
 O -2.371160 1.352802 0.000060  
 O 2.178807 1.512412 -0.000085  
 O 2.510759 -1.521706 -0.000124

[Mo<sub>2</sub>O<sub>6</sub>] I 5/6

E = -15997.25  
 Mo -1.476259 -0.058000 0.000002  
 Mo 1.476094 0.057827 -0.000003  
 O -0.000103 -0.000391 -1.213424  
 O -0.000096 -0.000405 1.213424  
 O -2.209598 -1.548383 -0.000005  
 O -2.548301 1.518547 0.000000  
 O 2.208467 1.548654 0.000007  
 O 2.550493 -1.517113 0.000001

[Mo<sub>2</sub>O<sub>6</sub>] I 7/8

E = -15993.80  
 Mo -1.458904 -0.016113 0.011076  
 Mo 1.488062 0.039559 -0.002480  
 O -0.009715 0.020242 -1.205655  
 O 0.033466 -0.048617 1.213571  
 O -2.473434 -1.666610 -0.012039  
 O -2.510624 1.604261 -0.026644  
 O 2.257286 1.512552 0.027916  
 O 2.549940 -1.544920 -0.042275

[HMo<sub>2</sub>O<sub>7</sub>] I 1/2

E = -18070.63  
 O -2.542783 1.354936 0.641266  
 O -2.631537 -0.703190 -1.255734  
 Mo -1.696759 0.038986 -0.036575  
 O 0.049669 0.601108 -0.768004  
 O 1.487709 -1.712421 0.512431  
 O 2.070741 1.066614 1.242893  
 Mo 1.660317 0.069891 -0.054544  
 O -1.220176 -1.101947 1.177958  
 O 2.896842 0.154223 -1.196077  
 H 0.646833 -1.847399 0.989145

[HMo<sub>2</sub>O<sub>7</sub>] I 3/4

E = -18067.90  
 O -2.542668 1.333490 0.191199  
 O -2.506221 -1.435896 -0.111803  
 Mo -1.550497 -0.035197 0.012884  
 O -0.288181 0.126016 -1.308373  
 O 2.449037 -0.898810 1.152539  
 O 1.948398 1.693256 -0.052764  
 Mo 1.320670 0.148973 -0.026814  
 O -0.212170 -0.161437 1.284991  
 O 2.114824 -1.082255 -1.310232  
 H 1.948564 -1.373490 1.820603

[HMo<sub>2</sub>O<sub>7</sub>] II 1/2

E = -18069.71  
 Mo -1.935109 0.003030 -0.002025  
 Mo 1.935096 0.003026 0.002022  
 O -0.000055 -0.739338 0.000023  
 O 2.023279 1.353883 1.034873  
 O 2.864942 -1.305957 0.590705  
 O -2.864973 -1.305122 -0.592483  
 O -2.404674 0.410235 1.583670  
 O 2.404229 0.411977 -1.583362  
 O -2.022705 1.355066 -1.033389  
 H 0.000200 -1.700306 -0.000160

[HMoO<sub>4</sub>] I 1/2

E = -10062.80  
 Mo -0.025872 -0.031946 -0.000700  
 O -1.179583 1.455852 0.022887  
 O 1.752767 0.487395 -0.242059  
 O -0.230648 -0.841227 1.452311  
 O -0.511761 -0.997479 -1.282628  
 H 2.440427 0.505393 0.425332

[HMoO<sub>4</sub>] I 3/4

E = -10059.39  
 Mo -0.220671 0.000260 -0.001970  
 O -1.014472 1.484624 -0.085200  
 O 1.558578 -0.218119 -0.952970  
 O 1.530636 0.048055 1.151503  
 O -1.183555 -1.380743 0.043857  
 H 2.138689 0.518550 -1.174778

[HMoO<sub>4</sub>] II 1/2

E = -10061.31  
 Mo 0.140216 0.077101 -0.000068  
 O 1.565594 -1.136671 0.000058  
 O 0.444959 1.708654 0.000111  
 O -1.530913 -0.422600 -0.711110  
 O -1.530613 -0.422624 0.711303  
 H 2.518700 -1.052324 -0.000027

[HMoO<sub>4</sub>] II 3/4

E = -10059.68  
 Mo -0.216240 0.113164 -0.058773  
 O -0.952567 -1.641276 0.026899  
 O -1.261279 1.367008 0.247363  
 O 1.793089 0.312436 -0.501268  
 O 1.763766 -0.385854 0.601273  
 H -1.661973 -1.971400 -0.525669

[HMoO<sub>4</sub>] III 1/2

E = -10060.21  
 Mo -0.372142 0.005024 -0.118998  
 O -1.573096 1.098120 0.303126  
 O -0.786143 -1.590864 0.193785  
 O 1.413621 0.651052 -0.032501  
 O 2.504350 -0.228594 0.097614  
 H 3.160123 0.351269 0.501712

[HMoO<sub>4</sub>] III 3/4

E = -10057.83  
 Mo 0.300144 -0.057289 0.029803  
 O 1.723435 -0.865443 -0.241570  
 O 0.350397 1.898895 0.129644  
 O -1.425748 -0.858865 0.484195  
 O -1.915285 0.051980 -0.525851  
 H -2.468441 0.665604 -0.023095

[HMoO<sub>4</sub>] IV 1/2

E = -10059.55  
 Mo 0.363606 -0.006121 0.166743  
 O 0.830951 1.492263 -0.388342  
 O 1.269883 -1.190670 -0.575675  
 O -1.512084 -0.368415 0.167256  
 O -2.609385 0.103284 -0.302200

H 0.893633 -0.034625 1.788494

[HMoO<sub>4</sub>] IV 3/4

E = -10058.16  
 Mo 0.430598 -0.000004 0.092952  
 O 1.227986 1.419409 -0.324302  
 O 1.228129 -1.419325 -0.324344  
 O -1.982133 -0.000056 0.413586  
 O -2.777752 -0.000000 -0.478258  
 H 0.345039 -0.000034 1.802558

[Mo<sub>2</sub>O<sub>7</sub>] I 1/2

E = -18052.01  
 O -2.483888 1.381718 0.435895  
 O 1.910615 -1.545680 -0.569578  
 Mo -1.563510 0.012608 0.022076  
 O 1.882281 1.363623 -1.109239  
 O -2.582997 -1.317537 -0.267323  
 Mo 1.410980 -0.066280 0.052342  
 O -0.368674 0.313631 -1.274062  
 O 2.579931 0.418623 1.184950  
 O -0.136487 -0.332604 1.208661

[Mo<sub>2</sub>O<sub>7</sub>] I 3/4

E = -18048.89  
 O 2.429924 -0.738316 1.450865  
 O -2.569404 -0.654718 -1.475438  
 Mo 1.863234 -0.056592 0.004738  
 O -2.581025 -0.659082 1.462556  
 O 2.651582 1.677647 -0.110506  
 Mo -1.932789 -0.070616 -0.003383  
 O 2.446825 -0.906567 -1.343740  
 O -2.091640 1.905623 0.019385  
 O 0.078901 0.043258 -0.010232

[O<sub>2</sub>] I 1/2

E = -4090.36  
 O -0.000000 0.000000 0.597111  
 O 0.000000 0.000000 -0.597111

[O<sub>2</sub>] I 3/4

E = -4090.86  
 O -0.000000 0.000000 0.597272  
 O 0.000000 0.000000 -0.597272

[CH<sub>3</sub>Mo<sub>4</sub>O<sub>13</sub>] I 1/2

E = -35145.37  
 Mo -2.329625 0.699653 -0.302497  
 O -2.980039 0.534548 -1.844595  
 O -1.241161 2.272515 -0.406541  
 O -3.553592 1.139798 0.765568  
 Mo -0.391557 -1.943358 0.294456  
 Mo 2.828042 -0.552036 -0.266553  
 O 3.521541 -1.001737 -1.732305  
 O 4.045549 -0.480182 0.892244  
 O 1.973089 1.080798 -0.448357  
 O 1.529934 -1.765577 0.245042  
 O -0.681541 -2.987448 -0.993002  
 O -0.662928 -2.757398 1.738910  
 O -2.416709 -1.299395 0.199490  
 Mo 0.534270 2.164733 0.232743  
 O -0.478973 0.002591 0.134246  
 O 0.543389 2.136582 1.907409  
 O 1.109364 3.679137 -0.196251  
 C -3.525918 -2.141883 -0.020067  
 H -4.441552 -1.608258 0.242725  
 H -3.428490 -3.027676 0.610453  
 H -3.565337 -2.444266 -1.069861

[CH<sub>3</sub>Mo<sub>4</sub>O<sub>13</sub>] I 3/4

E = -35142.71  
 Mo -3.469324 -0.253156 -0.454859  
 O -3.209758 0.382116 -1.996168  
 O -4.696155 0.592861 0.388645  
 O -4.539443 -1.768144 -0.707687





[CH<sub>3</sub>Mo<sub>4</sub>O<sub>13</sub>] XIV 1/2  
E = -35144.16

|           |           |           |
|-----------|-----------|-----------|
| 1.851937  | -0.529994 | 0.917394  |
| 0.895058  | 3.845198  | -0.596817 |
| 2.207403  | -0.936881 | 2.480289  |
| 3.503083  | -0.371607 | -0.072511 |
| 1.454237  | -2.221487 | -0.167321 |
| 0.548330  | 2.202375  | -0.459124 |
| -0.640549 | -2.030942 | -0.621985 |
| -0.307593 | -2.289728 | -2.253624 |
| -1.046706 | -3.486939 | 0.110517  |
| 1.666667  | 1.463419  | 0.766624  |
| -0.063083 | -0.469546 | 0.444532  |
| 0.822427  | 1.450025  | -1.953992 |
| -2.393729 | 0.548193  | 0.408009  |
| -1.269803 | 2.022353  | 0.014225  |
| -3.915546 | 1.129848  | 0.012326  |
| -2.268901 | -1.027163 | -0.622613 |
| -2.450101 | 0.232297  | 2.053853  |
| 3.808509  | -0.050681 | -1.273425 |
| 4.857397  | -0.080629 | -1.550597 |
| 3.039069  | 0.269690  | -1.972007 |
| 2.063838  | -2.567818 | -0.821076 |

[CH<sub>3</sub>Mo<sub>4</sub>O<sub>13</sub>] XV 1/2  
E = -35144.15

|           |           |           |
|-----------|-----------|-----------|
| 0.687466  | -1.868426 | 0.770704  |
| 3.776412  | 1.814895  | 0.071132  |
| 0.585220  | -2.822689 | 2.118886  |
| 1.855456  | -2.908842 | -0.462493 |
| -0.678448 | -1.988228 | -0.673696 |
| 2.323326  | 1.042694  | -0.305092 |
| -2.208186 | -0.946422 | -0.544835 |
| -3.055837 | -1.326594 | -1.947148 |
| -3.202730 | -1.397199 | 0.736470  |
| 2.118713  | -0.452579 | 0.676278  |
| -0.564965 | -0.222201 | 1.114889  |
| 2.289930  | 0.631070  | -1.951842 |
| -1.035272 | 2.202073  | 0.266786  |
| 0.841422  | 2.150168  | 0.050110  |
| -1.461607 | 3.675485  | -0.408896 |
| -2.023914 | 0.966623  | -0.720263 |
| -1.490520 | 2.304955  | 1.884504  |
| 2.283937  | -2.694161 | -1.601578 |
| 2.905499  | -3.456314 | -2.073620 |
| 2.054517  | -1.766437 | -2.128946 |
| -0.804730 | -0.067787 | 2.030971  |

[CH<sub>3</sub>Mo<sub>4</sub>O<sub>13</sub>] XVI 1/2  
E = -35143.92

|           |           |           |
|-----------|-----------|-----------|
| -0.043822 | -1.422234 | 1.096206  |
| 4.215085  | 0.208024  | -0.396348 |
| 0.033368  | -2.221121 | 2.537863  |
| -0.239107 | -3.002686 | -0.161140 |
| -2.008902 | -1.008179 | 0.660910  |
| 2.561654  | 0.004253  | -0.643298 |
| -2.493625 | 0.191234  | -0.604969 |
| -2.471099 | -0.424314 | -2.192154 |
| -4.096460 | 0.587955  | -0.279087 |
| 1.951223  | -1.142203 | 0.592607  |
| -0.074355 | -0.130792 | -0.816064 |
| 2.342298  | -0.560642 | -2.234638 |
| 0.088107  | 1.860076  | 0.479851  |
| 1.732683  | 1.758899  | -0.390503 |
| 0.166781  | 3.308731  | 1.306437  |
| -1.564690 | 1.917529  | -0.363593 |
| 0.041579  | 0.586240  | 1.688517  |
| -0.589869 | -3.153143 | -1.325725 |
| -0.670808 | -4.170290 | -1.716806 |
| -0.832809 | -2.301434 | -1.964679 |
| 0.098391  | -0.228804 | -1.753815 |

[CH<sub>3</sub>Mo<sub>4</sub>O<sub>13</sub>] XVII 1/2  
E = -35143.85

|           |           |           |
|-----------|-----------|-----------|
| 1.829583  | -0.042886 | 0.968109  |
| -0.118746 | 3.811505  | -0.566826 |
| 1.939525  | -0.220017 | 2.621365  |

|           |           |           |
|-----------|-----------|-----------|
| 3.875573  | 0.176716  | 0.309143  |
| 1.919880  | -1.635125 | -0.040265 |
| -0.050932 | 2.131464  | -0.552616 |
| 0.048580  | -1.850032 | -0.756053 |
| 0.251054  | -1.825709 | -2.407073 |
| -0.109277 | -3.634662 | -0.073993 |
| 1.572762  | 1.797378  | 0.365362  |
| 0.006433  | -0.141074 | 0.317361  |
| 0.182072  | 1.640999  | -2.147105 |
| -2.481023 | -0.077050 | 0.481131  |
| -1.801542 | 1.641313  | -0.022806 |
| -4.126441 | 0.032683  | 0.148047  |
| -1.912857 | -1.588487 | -0.428589 |
| -2.350197 | -0.301126 | 2.146055  |
| 4.193666  | -0.085517 | -0.835796 |
| 5.235625  | 0.058433  | -1.141458 |
| 3.463903  | -0.470681 | -1.556282 |
| -1.028176 | -3.892664 | 0.043114  |

[CH<sub>3</sub>Mo<sub>4</sub>O<sub>13</sub>] XVIII 1/2  
E = -35143.85

|           |           |           |
|-----------|-----------|-----------|
| 1.829594  | -0.043596 | 0.968327  |
| -0.117726 | 3.811423  | -0.567447 |
| 1.939986  | -0.221489 | 2.621465  |
| 3.875449  | 0.176462  | 0.308403  |
| 1.919581  | -1.635517 | -0.040362 |
| -0.050173 | 2.131374  | -0.552296 |
| 0.048181  | -1.849936 | -0.756168 |
| 0.250734  | -1.826255 | -2.407173 |
| -0.110310 | -3.634069 | -0.073054 |
| 1.572868  | 1.797182  | 0.366463  |
| 0.006483  | -0.141336 | 0.317673  |
| 0.183312  | 1.640008  | -2.146473 |
| -2.481268 | -0.076391 | 0.480827  |
| -1.800938 | 1.641857  | -0.022344 |
| -4.126584 | 0.034070  | 0.147464  |
| -1.913207 | -1.587700 | -0.429074 |
| -2.350835 | -0.300993 | 2.145700  |
| 4.192662  | -0.084776 | -0.837008 |
| 5.234394  | 0.059319  | -1.143389 |
| 3.462412  | -0.469075 | -1.557474 |
| -1.029249 | -3.891654 | 0.044038  |

[CH<sub>3</sub>Mo<sub>4</sub>O<sub>13</sub>] XIX 1/2  
E = -35143.83

|    |           |           |           |
|----|-----------|-----------|-----------|
| Mo | 2.927214  | 0.388279  | 0.324293  |
| O  | 1.910130  | -0.993116 | 0.964210  |
| O  | 2.782382  | 1.858840  | 1.131728  |
| O  | 4.561279  | -0.003942 | 0.174040  |
| Mo | 0.729148  | -1.184084 | -0.710032 |
| Mo | -2.309775 | -0.828975 | 0.183254  |
| O  | -2.765177 | -0.762662 | 1.796630  |
| O  | -3.371216 | -1.910012 | -0.522654 |
| O  | -2.750666 | 0.885196  | -0.467768 |
| O  | -0.624458 | -1.968542 | 0.677788  |
| O  | 1.365843  | -2.573497 | -1.367658 |
| O  | -0.798056 | -0.945012 | -1.512967 |
| O  | 1.939872  | 0.166457  | -1.281912 |
| Mo | -1.247116 | 2.041667  | -0.157306 |
| O  | -0.639129 | 2.734754  | -1.574522 |
| O  | -1.575478 | 3.249013  | 0.980100  |
| O  | -0.239200 | 0.710302  | 0.492896  |
| C  | -0.308916 | -2.313083 | 2.020774  |
| H  | 0.553835  | -2.978023 | 2.018405  |
| H  | -1.172015 | -2.817451 | 2.453702  |
| H  | -0.075147 | -1.417562 | 2.595227  |

[CH<sub>3</sub>Mo<sub>4</sub>O<sub>13</sub>] XIX 3/4  
E = -35142.25

|    |           |           |           |
|----|-----------|-----------|-----------|
| Mo | 3.412824  | 0.586386  | 0.402732  |
| O  | 2.673900  | -1.090735 | 0.070775  |
| O  | 3.716339  | 0.901478  | 2.034737  |
| O  | 4.787053  | 0.930954  | -0.519917 |
| Mo | 0.997591  | -0.406568 | -0.786864 |
| Mo | -1.899347 | -1.476692 | 0.370842  |
| O  | -1.853452 | -2.180692 | 1.898927  |
| O  | -2.589467 | -2.564108 | -0.710435 |
| O  | -3.119127 | -0.049986 | 0.506700  |
| O  | 0.075195  | -2.079757 | -0.083690 |

|    |           |           |           |
|----|-----------|-----------|-----------|
| O  | 1.067589  | -0.525756 | -2.433286 |
| O  | -0.768727 | 0.133746  | -0.176094 |
| O  | 1.839741  | 1.318408  | -0.251413 |
| Mo | -2.420032 | 1.666011  | -0.027236 |
| O  | -2.540345 | 1.903014  | -1.685148 |
| O  | -3.519093 | 2.729331  | 0.703266  |
| O  | -0.946876 | 2.573560  | 0.730816  |
| C  | 0.579831  | -3.389407 | 0.096974  |
| H  | 1.666606  | -3.368668 | 0.013376  |
| H  | 0.153311  | -4.047405 | -0.663334 |
| H  | 0.295759  | -3.746931 | 1.088288  |

[CH<sub>3</sub>Mo<sub>4</sub>O<sub>13</sub>] XX 1/2  
E = -35143.83

|           |           |           |
|-----------|-----------|-----------|
| 2.026067  | 0.089487  | 0.847974  |
| -0.125173 | 3.675820  | -0.048050 |
| 2.260796  | 0.015665  | 2.500525  |
| 4.042157  | 0.092356  | 0.084074  |
| 1.898185  | -1.530854 | -0.148365 |
| -0.043908 | 1.840057  | -0.594908 |
| 0.017140  | -2.000274 | -0.469477 |
| 0.160508  | -2.468677 | -2.075954 |
| -0.097162 | -3.383984 | 0.471991  |
| 1.833426  | 1.808777  | 0.084146  |
| 0.113649  | 0.027395  | 0.387971  |
| 0.079106  | 1.705850  | -2.248393 |
| -2.715975 | 0.012818  | 0.377294  |
| -1.962156 | 1.607887  | -0.156136 |
| -4.333256 | -0.011769 | -0.099136 |
| -1.825080 | -1.401910 | -0.459414 |
| -2.668658 | -0.141508 | 2.057227  |
| 4.264433  | -0.162532 | -1.085053 |
| 3.454637  | -0.402370 | -1.782114 |
| 5.300585  | -0.163685 | -1.440187 |
| 0.747852  | 4.013194  | 0.171649  |

[CH<sub>3</sub>Mo<sub>4</sub>O<sub>13</sub>] XXI 1/2  
E = -35143.72

|           |           |           |
|-----------|-----------|-----------|
| -1.171604 | 1.592417  | -0.713663 |
| -1.638841 | 1.885299  | -2.280706 |
| 0.683817  | 2.269086  | -0.563645 |
| -1.784298 | 2.942110  | 0.490746  |
| -1.574551 | -1.446133 | 0.538322  |
| 1.511548  | -1.847118 | -0.448481 |
| 1.202144  | -1.924438 | -2.094031 |
| 2.672932  | -3.016689 | -0.149821 |
| 2.412725  | -0.240954 | -0.024731 |
| 0.021800  | -2.482906 | 0.539995  |
| -2.683395 | -2.344250 | -0.350272 |
| -2.072898 | -1.376083 | 2.142682  |
| -2.673066 | 0.397593  | 0.074437  |
| 1.963416  | 1.516281  | 0.507939  |
| -0.349932 | -0.131462 | -0.261903 |
| 1.412376  | 1.468338  | 2.099168  |
| 3.352691  | 2.464491  | 0.451420  |
| -3.926446 | 0.715060  | 0.417231  |
| -4.430091 | 1.456850  | -0.192058 |
| -4.471831 | -0.011771 | 1.003509  |
| -2.597802 | 2.734689  | 0.965562  |

[CH<sub>3</sub>Mo<sub>4</sub>O<sub>13</sub>] XXII 1/2  
E = -35143.72

|           |           |           |
|-----------|-----------|-----------|
| -1.573971 | 1.446450  | -0.538570 |
| -2.071543 | 1.376243  | -2.143149 |
| 0.022756  | 2.482780  | -0.539784 |
| -2.682820 | 2.345381  | 0.349216  |
| -1.171954 | -1.591931 | 0.713896  |
| 1.962692  | -1.516760 | -0.508208 |
| 1.411181  | -1.468266 | -2.099261 |
| 3.351644  | -2.465478 | -0.452352 |
| 2.412920  | 0.240115  | 0.024768  |
| 0.683103  | -2.269344 | 0.563608  |
| -1.785773 | -2.941553 | -0.490010 |
| -1.639147 | -1.884343 | 2.281033  |
| -2.673032 | -0.396459 | -0.074291 |
| 1.512108  | 1.846495  | 0.448741  |
| -0.349669 | 0.131521  | 0.261909  |
| 1.202473  | 1.923589  | 2.094261  |
| 2.673933  | 3.015742  | 0.150496  |

-3.926521 -0.713686 -0.417034  
-4.471404 -0.012699 -1.004358  
-4.430761 -1.454380 0.193117  
-2.599665 -2.734267 -0.964210

[CH<sub>3</sub>Mo<sub>4</sub>O<sub>13</sub>] XXIII 1/2  
E = -35143.72

-1.175037 1.589365 -0.714474  
-1.641846 1.879032 -2.282220  
0.677899 2.271520 -0.563159  
-1.793678 2.938698 0.487697  
-1.570272 -1.449410 0.539497  
1.516377 -1.842614 -0.449810  
1.206896 -1.919245 -2.095398  
2.680391 -3.009882 -0.152262  
2.414395 -0.234827 -0.024945  
0.028374 -2.482540 0.538470  
-2.678592 -2.351326 -0.346051  
-2.065473 -1.379685 2.144759  
-2.672991 0.390049 0.074183  
1.958102 1.520184 0.509151  
-0.348166 -0.131627 -0.261271  
1.405044 1.468675 2.099564  
3.344574 2.472603 0.455847  
-3.928017 0.703990 0.414731  
-4.432698 1.444090 -0.195775  
-4.472477 -0.024504 0.999832  
-2.606475 2.728850 0.962592

[CH<sub>3</sub>Mo<sub>4</sub>O<sub>13</sub>] XXIV 1/2  
E = -35143.72

-1.571455 1.448668 -0.538764  
-2.069155 1.378867 -2.143335  
0.026948 2.482630 -0.540110  
-2.678922 2.349362 0.349004  
-1.174454 -1.590273 0.714136  
1.960060 -1.519552 -0.508329  
1.408573 -1.470458 -2.099370  
3.347806 -2.469924 -0.452304  
2.412989 0.236731 0.024241  
0.679526 -2.270422 0.563614  
-1.790208 -2.939079 -0.489885  
-1.642463 -1.881814 2.281192  
-2.673524 -0.392578 -0.074435  
1.515056 1.844414 0.448874  
-0.349482 0.131852 0.261577  
1.204872 1.921385 2.094297  
2.678914 3.011911 0.151554  
-3.927589 -0.707719 -0.417007  
-4.471650 0.019920 -1.003570  
-4.432832 -1.447987 0.192878  
-2.603702 -2.730072 -0.964056

[CH<sub>3</sub>Mo<sub>4</sub>O<sub>13</sub>] XXV 1/2  
E = -35143.72

-2.523386 0.481122 -0.266887  
-3.159909 0.362702 -1.818698  
-1.701060 2.148180 -0.175949  
-3.801436 0.561112 0.826685  
-0.115891 -1.946809 0.238592  
2.978503 -0.221661 -0.246014  
3.643685 -0.535595 -1.763720  
4.222663 -0.127520 0.888539  
1.976055 1.288821 -0.273397  
1.733719 -1.542898 0.237781  
-0.250412 -3.056740 -1.013896  
-0.343187 -2.756670 1.687174  
-2.230280 -1.570570 0.042889  
0.203744 1.963800 0.323303  
-0.496701 0.026377 0.084839  
0.343078 2.332980 1.931491  
0.522062 3.519332 -0.740719  
-3.184106 -2.513615 -0.017483  
-4.209499 -2.180460 -0.079527  
-2.864859 -3.526057 -0.217174  
-0.291971 3.981167 -0.960375

[CH<sub>3</sub>Mo<sub>4</sub>O<sub>13</sub>] XXVI 1/2

E = -35143.71

-2.525520 0.530325 -0.266242  
-3.144960 0.427500 -1.825929  
-1.670894 2.172546 -0.145943  
-3.814044 0.619624 0.814984  
-0.165024 -1.943434 0.225968  
2.967975 -0.271104 -0.231330  
3.686759 -0.603168 -1.720580  
4.174245 -0.178457 0.943343  
2.000853 1.266056 -0.317232  
1.696892 -1.569055 0.220836  
-0.317189 -3.045417 -1.031330  
-0.392094 -2.758271 1.671737  
-2.265919 -1.529628 0.051966  
0.228770 1.959250 0.316078  
-0.499949 0.033998 0.072071  
0.395213 2.316661 1.924348  
0.629692 3.500553 -0.741507  
-3.238866 -2.453993 0.007673  
-4.258643 -2.100572 -0.025695  
-2.943798 -3.473560 -0.192480  
1.546352 3.522976 -1.029878

[CH<sub>3</sub>Mo<sub>4</sub>O<sub>13</sub>] XXVII 1/2

E = -35143.65

2.215695 0.844102 -0.018296  
3.034587 0.895034 1.705823  
0.913543 2.251048 0.539294  
3.164637 1.522903 -1.203169  
0.597194 -1.997407 -0.201529  
-2.691331 -0.832748 0.140373  
-3.576493 -1.400915 1.450941  
-3.735795 -0.704604 -1.168399  
-1.952463 0.817844 0.566103  
-1.321309 -2.022621 -0.262278  
0.925209 -2.664938 1.309853  
1.097708 -3.049514 -1.413460  
2.698804 -1.159960 -0.051557  
-0.828981 2.258935 -0.026885  
0.574033 -0.115187 -0.500916  
-0.899155 2.382981 -1.700552  
-1.528539 3.654015 0.593269  
3.772317 -1.776385 0.444707  
4.734006 -1.300351 0.286741  
3.684104 -2.836955 0.639326  
3.501609 0.085888 1.952254

[CH<sub>3</sub>Mo<sub>4</sub>O<sub>13</sub>] XXVIII 1/2

E = -35143.64

-2.426587 0.614209 -0.167814  
-3.336841 0.460908 -1.573238  
-1.491236 2.234026 -0.329512  
-3.461584 0.810179 1.145497  
-0.286059 -1.921232 -0.008346  
2.879190 -0.409694 -0.089677  
3.765709 -0.889883 -1.440994  
3.943635 -0.159704 1.193022  
1.913167 1.135655 -0.484930  
1.631038 -1.675550 0.356285  
-0.301274 -2.755816 -1.444732  
-0.482351 -3.036047 1.529422  
-2.331247 -1.515997 0.168915  
0.392738 2.150754 0.099851  
-0.498081 0.028466 -0.052975  
0.506962 2.275472 1.763985  
0.837564 3.643628 -0.518233  
-3.351219 -2.360489 0.360125  
-4.325424 -1.922680 0.529409  
-3.228676 -3.371526 -0.011210  
-1.392144 -3.215138 1.792323

[CH<sub>3</sub>Mo<sub>4</sub>O<sub>13</sub>] XXIX 1/2

E = -35143.54

1.438387 -1.116264 0.965781  
2.206168 3.396030 -0.418329  
1.789338 -1.739945 2.468675  
3.079349 -1.170968 -0.484584  
0.703912 -2.416505 -0.213368  
1.346339 1.943267 -0.395470

-1.137796 -1.867660 -0.574068  
-1.014277 -1.908427 -2.257464  
-2.043085 -3.177428 -0.031877  
1.997602 0.818727 0.884439  
-0.344694 -0.506121 0.800942  
1.577639 1.092777 -1.869640  
-2.103358 1.260257 0.253103  
-0.429713 2.243127 -0.088176  
-3.198966 2.408689 -0.276132  
-2.461372 -0.392266 -0.479663  
-2.093279 1.236780 2.153679  
2.811208 -1.146200 -1.675768  
3.607853 -0.914099 -2.388971  
1.814855 -1.396295 -2.048208  
-1.268930 0.888685 2.511196

[CH<sub>3</sub>Mo<sub>4</sub>O<sub>13</sub>] XXX 1/2

E = -35143.42

1.760154 -0.149357 1.060810  
-0.027855 3.950266 -0.375569  
2.155865 -0.371874 2.669170  
3.794294 0.273443 0.261411  
1.884568 -1.600310 -0.162804  
-0.068138 2.284526 -0.566433  
0.038553 -1.934019 -0.768000  
0.223282 -1.287827 -2.340479  
0.064804 -3.617186 -0.780727  
1.397962 1.630811 0.432523  
-0.074216 -0.580994 0.769881  
0.171747 1.542634 -2.275052  
-2.416833 -0.137667 0.531692  
-1.683032 1.570206 0.100555  
-4.002445 0.051355 0.003907  
-1.854732 -1.618634 -0.488639  
-2.544441 -0.429955 2.181773  
4.037918 0.102931 -0.913905  
5.043624 0.327969 -1.289852  
3.278258 -0.284235 -1.603748  
0.227330 0.576918 -2.429461

[CH<sub>3</sub>Mo<sub>4</sub>O<sub>13</sub>] XXXI 1/2

E = -35143.32

1.534549 -0.128558 1.183095  
0.326501 3.719839 -1.233240  
1.792062 -0.455383 2.791132  
3.525851 0.433789 0.452914  
1.832695 -1.554077 -0.066909  
0.146141 2.107095 -0.760373  
0.103953 -0.285133 -0.730615  
0.438493 -2.319443 -2.365978  
-0.191975 -3.594006 -0.059671  
1.162565 1.751591 0.757197  
-0.257089 -0.551635 0.677834  
0.799889 1.079146 -1.960756  
-2.402244 0.176702 0.565954  
-1.595505 1.725173 -0.451995  
-3.975035 -0.121798 -0.005066  
-1.720758 -1.309091 -1.016365  
-2.392149 0.549567 2.217177  
3.754650 0.471204 -0.740614  
4.760419 0.752586 -1.074530  
2.982444 0.240521 -1.484729  
-2.295895 -1.594191 -1.725819

[CH<sub>3</sub>Mo<sub>4</sub>O<sub>13</sub>] XXXII 1/2

E = -35143.19

0.010679 2.371991 -0.216420  
-2.992339 -0.000169 1.568297  
0.157521 2.912199 1.369738  
-0.007586 3.752515 -1.169597  
1.530454 1.462268 -0.784452  
-2.525037 0.000127 -0.042701  
2.546380 0.000051 -0.067157  
4.003604 -0.001364 -0.879670  
2.679276 0.000920 1.772355  
-1.680841 1.592734 -0.578289  
-0.090841 0.001112 0.943322  
-3.952408 -0.000205 -0.922764  
0.010574 -2.372574 -0.216240





O 0.865352 -1.388219 0.371769  
C -1.946682 0.000071 0.228091  
H -2.292941 0.891620 0.749621  
H -2.292909 -0.891210 0.750095  
H -2.397230 -0.000205 -0.782614

[CH<sub>3</sub>MoO<sub>2</sub>] I 3/4

E = -7034.23

Mo 0.104566 0.058669 0.000012  
O 0.342613 1.699398 -0.000030  
O 1.420425 -1.350855 -0.000028  
C -1.932608 -0.545112 -0.000034  
H -2.603707 0.315734 0.000459  
H -2.148043 -1.149042 0.888780  
H -2.148676 -1.148481 -0.889054

[CH<sub>3</sub>MoO<sub>4</sub>] I 1/2

E = -11131.45

Mo -0.338994 0.034928 0.001669  
O -1.235035 -1.626108 0.039389  
O 1.412928 -0.137154 0.558326  
O -0.385086 0.610758 -1.574343  
O -1.182489 1.060728 1.032179  
C 2.704944 -0.085026 -0.010928  
H 3.305332 0.633337 0.548163  
H 2.657660 0.216561 -1.059769  
H 3.162542 -1.072501 0.062674

[CH<sub>3</sub>MoO<sub>4</sub>] I 3/4

E = -11128.22

Mo -0.489187 -0.027365 -0.011399  
O 0.629232 0.928529 1.422622  
O 1.430245 0.431897 -0.542828  
O -0.821029 -1.640467 0.363729  
O -1.702897 0.872262 -0.761786  
C 2.593310 -0.332693 -0.378680  
H 3.408398 0.310276 -0.045539  
H 2.841433 -0.734687 -1.368083  
H 2.451740 -1.167891 0.310554

[CH<sub>3</sub>MoO<sub>4</sub>] II 1/2

E = -11129.96

Mo -0.220933 0.152357 -0.000018  
O 1.500126 -0.521396 -0.000071  
O -0.447499 1.800581 0.000031  
O -1.641720 -0.864540 0.712461  
O -1.641816 -0.864539 -0.712382  
C 2.892573 -0.324903 0.000034  
H 3.317005 -0.793806 -0.889001  
H 3.317115 -0.795684 0.888039  
H 3.136912 0.739069 0.001207

[CH<sub>3</sub>MoO<sub>4</sub>] II 3/4

E = -11128.29

Mo -0.191291 0.281511 0.031942  
O 1.388432 -0.695599 -0.311685  
O -0.083665 1.929757 -0.165454  
O -1.871635 -0.776267 0.620328  
O -1.599435 -1.226001 -0.574818  
C 2.699675 -0.634095 0.191223  
H 3.157269 -1.622279 0.106093  
H 2.716566 -0.331890 1.243754  
H 3.292774 0.080171 -0.385716

[CH<sub>3</sub>MoO<sub>4</sub>] III 1/2

E = -11129.84

Mo 0.146201 0.166766 0.000005  
O 0.767812 0.866078 1.387599  
O 0.767406 0.865242 -1.388195  
O -1.880574 0.379158 0.000141  
O -1.679872 -0.903741 0.000125  
C 1.064736 -1.742924 0.000286  
H 2.147321 -1.612504 0.000236  
H 0.762696 -2.293861 -0.891606  
H 0.762941 -2.294149 0.892085

[CH<sub>3</sub>MoO<sub>4</sub>] IV 1/2

E = -11129.01

Mo 0.662740 0.003312 0.119288  
O 0.738737 1.662168 -0.156129  
O 2.039619 -0.830826 -0.356975  
O -0.963353 -0.939773 0.106367  
O -2.309634 -0.744217 -0.156454  
C -2.618754 0.629437 -0.062461  
H -3.689419 0.683265 -0.253141  
H -2.076683 1.209736 -0.816157  
H -2.399417 1.012471 0.939506

[CH<sub>3</sub>MoO<sub>4</sub>] IV 3/4

E = -11126.69

Mo 0.570585 0.071622 0.066797  
O 1.037723 -1.809151 -0.149047  
O 1.641847 1.184994 -0.542206  
O -1.067459 0.519003 1.042805  
O -1.620167 -0.475432 0.160366  
C -2.576741 0.138174 -0.695656  
H -2.887150 -0.647584 -1.383163  
H -2.132178 0.971589 -1.243933  
H -3.420341 0.483516 -0.099777

[Mo<sub>3</sub>O<sub>10</sub>]<sup>2-</sup> I 1/2

E = -26057.41

Mo 3.387013 -0.535255 -0.000690  
O 1.508284 0.025864 -0.014343  
O -3.699666 -1.492226 -1.389804  
O 3.700059 -1.491562 -1.390178  
O 3.691480 -1.456646 1.414021  
Mo -0.000062 1.070719 -0.001099  
O -0.000005 2.052696 1.376691  
O -0.000504 2.086525 -1.354481  
O -1.508021 0.025282 -0.013821  
Mo -3.386918 -0.535324 -0.000672  
O -4.395687 0.852670 -0.015373  
O -3.692276 -1.455822 1.414439  
O 4.396159 0.852484 -0.014226

[Mo<sub>3</sub>O<sub>10</sub>]<sup>2-</sup> I 3/4

E = -26053.87

Mo 3.465146 -0.531650 0.000443  
O 1.587444 0.040925 -0.020980  
O -3.695189 -1.723658 -1.212587  
O 3.692205 -1.723774 -1.212871  
O 3.827076 -1.193134 1.542036  
Mo -0.000158 0.952009 -0.006968  
O -0.001210 2.341313 1.140093  
O -0.000706 2.380189 -1.105838  
O -1.586609 0.038984 -0.024133  
Mo -3.464873 -0.531849 0.000422  
O -4.488787 0.809179 -0.307154  
O -3.824441 -1.193188 1.542620  
O 4.489613 0.808482 -0.309142

[Mo<sub>3</sub>O<sub>10</sub>]<sup>2-</sup> II 1/2

E = -26056.27

Mo -1.531156 -0.995233 -0.014438  
O 0.106600 -2.002292 0.275105  
O -1.792441 0.910599 0.266159  
O -2.461216 -1.605683 -1.299562  
O -2.297695 -1.490151 1.429354  
Mo 1.628447 -0.826856 -0.014286  
O 2.617732 -1.333401 -1.299918  
O 0.000206 0.000925 -0.979326  
Mo -0.097202 1.822372 -0.014943  
O 1.684691 1.094931 0.269357  
O -0.146592 2.725256 1.434028  
O 2.443089 -1.240629 1.428886  
O -0.154840 2.938958 -1.294828

[Mo<sub>3</sub>O<sub>10</sub>]<sup>2-</sup> II 3/4

E = -26053.83

Mo -1.623458 -0.871481 -0.012839  
O -0.000165 -1.872782 0.322405

O -1.773906 0.989490 0.349387  
O -2.485534 -1.367891 -1.390029  
O -2.512130 -1.472977 1.313384  
Mo 1.623284 -0.871763 -0.012878  
O 2.485254 -1.368372 -1.390057  
O -0.000019 0.104397 -1.070398  
Mo 0.000154 1.764172 -0.086911  
O 1.774103 0.989198 0.349273  
O 0.000470 2.220878 1.864477  
O 2.511855 -1.473376 1.313352  
O 0.000180 3.141564 -1.070501

[Mo<sub>3</sub>O<sub>10</sub>]<sup>2-</sup> III 1/2

E = -26053.17

Mo 2.106183 0.002672 0.210913  
O 0.522007 -1.300484 0.121698  
O 0.519502 1.302372 0.108864  
O 2.724343 0.008755 1.780126  
O 3.220901 -0.0723383 -1.207666  
Mo -1.200585 -1.703642 -0.026284  
O -1.535545 -2.492216 -1.508083  
O -1.734038 -2.643640 1.301346  
O -2.079331 -0.002323 -0.010050  
Mo -1.205158 1.700997 -0.027404  
O -1.732876 2.636249 1.305773  
O -1.551597 2.492858 -1.504912  
O 3.219326 0.721665 -1.212526

[Mo<sub>3</sub>O<sub>10</sub>]<sup>2-</sup> III 3/4

E = -26053.27

Mo 1.980531 -0.345190 -0.208296  
O 0.903149 1.370625 -0.238580  
O 0.391195 -1.409884 0.041945  
O 2.625311 -0.608406 -1.742510  
O 3.232857 0.268903 1.128995  
Mo -0.802196 1.929420 0.024967  
O -0.930313 2.860468 1.452904  
O -1.333345 2.872753 -1.299179  
O -1.790627 0.410073 0.171473  
Mo -1.542557 -1.583515 0.045366  
O -2.127162 -2.195645 -1.449334  
O -2.073162 -2.409240 1.456149  
O 3.014264 -1.163405 1.202446

[Mo<sub>3</sub>O<sub>10</sub>]<sup>2-</sup> IV 1/2

E = -26052.43

Mo 1.777999 -0.734689 0.018974  
O 1.763207 1.125734 0.179475  
O 2.872162 -0.999622 -1.260028  
O 2.398623 -1.278646 1.506280  
Mo -0.031383 1.795801 -0.001000  
O -0.183718 2.708741 1.436802  
O 0.098387 2.708189 -1.441436  
O -1.805539 1.078798 -0.177176  
Mo -1.753078 -0.782627 -0.017094  
O -2.376805 -1.341710 -1.498048  
O -2.811923 -1.088133 1.283388  
O -0.475269 -2.195680 0.477783  
O 0.554798 -2.179718 -0.511665

[Mo<sub>3</sub>O<sub>10</sub>]<sup>2-</sup> IV 3/4

E = -26052.60

Mo 2.226156 -0.895729 0.048084  
O 1.364897 0.847536 0.549295  
O 3.240430 -0.626109 -1.312415  
O 2.916056 -1.824137 1.315820  
Mo 0.001373 1.923553 0.000194  
O -0.487265 2.921653 1.294992  
O 0.493126 2.915958 -1.297727  
O -1.365423 0.850118 -0.545744  
Mo -2.227542 -0.893603 -0.047904  
O -2.919281 -1.818584 -1.317158  
O -3.240578 -0.626322 1.314001  
O -0.519164 -1.672879 0.497708  
O 0.517271 -1.671897 -0.500734

[Mo<sub>3</sub>O<sub>9</sub>] I 1/2

E = -24006.19

|    |           |           |           |
|----|-----------|-----------|-----------|
| Mo | -1.998169 | -0.360992 | 0.000305  |
| O  | -1.101423 | 1.301513  | 0.000534  |
| O  | -0.576471 | -1.604561 | 0.003963  |
| O  | -2.968385 | -0.534153 | 1.342009  |
| O  | -2.961997 | -0.536619 | -1.345711 |
| Mo | 0.686484  | 1.910761  | -0.000162 |
| O  | 1.018240  | 2.836254  | -1.343407 |
| O  | 1.019146  | 2.834244  | 1.344171  |
| O  | 1.678074  | 0.303098  | -0.001730 |
| Mo | 1.311662  | -1.549874 | 0.000161  |
| O  | 1.949011  | -2.298992 | 1.343129  |
| O  | 1.943926  | -2.300228 | -1.344553 |

[Mo<sub>3</sub>O<sub>9</sub>] I 3/4

E = -24003.12

|    |           |           |           |
|----|-----------|-----------|-----------|
| Mo | 1.036525  | 1.731750  | -0.011463 |
| O  | 1.794131  | 0.001739  | -0.000357 |
| O  | -0.808377 | 1.386286  | -0.102273 |
| O  | 1.426958  | 2.577008  | 1.372854  |
| O  | 1.541424  | 2.621543  | -1.329435 |
| Mo | 1.040039  | -1.729771 | -0.011014 |
| O  | 1.543589  | -2.616799 | -1.331391 |
| O  | 1.435761  | -2.576124 | 1.371193  |
| O  | -0.805886 | -1.388263 | -0.096365 |
| Mo | -2.099184 | -0.001891 | 0.035116  |
| O  | -2.781945 | -0.000162 | 1.541573  |
| O  | -3.226899 | -0.005691 | -1.492153 |

[Mo<sub>3</sub>O<sub>9</sub>] II 1/2

E = -24004.82

|    |           |           |           |
|----|-----------|-----------|-----------|
| Mo | 0.000017  | -0.730093 | -0.000206 |
| Mo | -2.678512 | 0.372835  | 0.000103  |
| O  | -1.349004 | -0.156403 | 1.235484  |
| O  | -1.350572 | -0.158581 | -1.235651 |
| O  | 0.000220  | -2.376990 | 0.000321  |
| O  | -3.056383 | 1.999787  | -0.001634 |
| O  | -4.078628 | -0.537361 | 0.001642  |
| O  | 1.349614  | -0.157052 | -1.235661 |
| O  | 1.349960  | -0.157420 | 1.235623  |
| Mo | 2.678444  | 0.372944  | 0.000065  |
| O  | 4.078048  | -0.538099 | -0.000540 |
| O  | 3.057010  | 1.999767  | 0.000618  |

[Mo<sub>3</sub>O<sub>9</sub>] II 3/4

E = -24002.58

|    |           |           |           |
|----|-----------|-----------|-----------|
| Mo | -0.044427 | -0.785595 | 0.000017  |
| Mo | -2.651118 | 0.395334  | -0.000013 |
| O  | -1.351778 | -0.116292 | 1.266677  |
| O  | -1.352806 | -0.117957 | -1.266845 |
| O  | -0.039316 | -2.425251 | 0.000512  |
| O  | -3.023805 | 2.030178  | -0.001098 |
| O  | -4.056004 | -0.518038 | 0.001048  |
| O  | 1.488434  | -0.070847 | -1.291775 |
| O  | 1.489118  | -0.071919 | 1.291828  |
| Mo | 2.625970  | 0.342952  | -0.000121 |
| O  | 4.018184  | -0.586171 | -0.001113 |
| O  | 3.193241  | 2.124668  | 0.001381  |

[Mo<sub>4</sub>O<sub>12</sub>] I 1/2

E = -32012.34

|    |           |           |           |
|----|-----------|-----------|-----------|
| Mo | 0.014304  | -2.531924 | -0.034201 |
| O  | -0.001774 | -3.506942 | 1.338150  |
| O  | -0.056102 | -3.515687 | -1.398605 |
| O  | -1.355820 | -1.371311 | -0.008972 |
| Mo | 2.707953  | -0.000041 | 0.024308  |
| Mo | -2.810409 | 0.000051  | 0.032277  |
| O  | -3.755585 | 0.000016  | -1.374151 |
| O  | 1.626120  | -1.502607 | -0.071531 |
| O  | 3.816128  | -0.000216 | -1.236120 |
| Mo | 0.014405  | 2.531914  | -0.034225 |
| O  | 1.626184  | 1.502547  | -0.071940 |
| O  | -0.056094 | 3.515979  | -1.398407 |
| O  | -1.355754 | 1.371341  | -0.009137 |
| O  | -0.001513 | 3.506633  | 1.338342  |
| O  | -3.670361 | 0.000134  | 1.491877  |
| O  | 3.571743  | 0.000108  | 1.462658  |

[Mo<sub>4</sub>O<sub>12</sub>] I 3/4

E = -32009.01

|    |           |           |           |
|----|-----------|-----------|-----------|
| Mo | -0.784838 | -2.410286 | -0.236105 |
| O  | -0.755936 | -3.240638 | -1.701880 |
| O  | -1.246388 | -3.481591 | 0.977448  |
| O  | 0.823079  | -1.684781 | 0.122573  |
| Mo | -2.483893 | 0.782806  | 0.118303  |
| Mo | 2.595433  | -0.772631 | 0.206893  |
| O  | 3.373634  | -0.973104 | 1.698625  |
| O  | -2.039953 | -0.976155 | -0.400873 |
| O  | -2.275227 | -0.029916 | 1.840325  |
| Mo | 0.697331  | 2.488203  | -0.187232 |
| O  | -1.177199 | 2.057647  | -0.235497 |
| O  | 0.984109  | 3.579883  | 1.063012  |
| O  | 1.593831  | 0.956799  | 0.073929  |
| O  | 1.128377  | 3.201465  | -1.650734 |
| O  | 3.548979  | -1.074274 | -1.161552 |
| O  | -4.083478 | 1.202184  | -0.110134 |

[Mo<sub>4</sub>O<sub>12</sub>] II 1/2

E = -32011.98

|    |           |           |           |
|----|-----------|-----------|-----------|
| Mo | 2.615069  | -0.209861 | 0.474086  |
| O  | 0.200229  | 3.685640  | 0.074364  |
| O  | 3.206278  | -0.132037 | 2.045990  |
| O  | 3.926130  | -0.240953 | -0.578565 |
| O  | 1.589429  | -1.761832 | 0.256627  |
| Mo | -0.092555 | 2.126663  | -0.469881 |
| Mo | -0.138570 | -2.002346 | -0.576056 |
| O  | -0.274370 | -2.838510 | -2.018094 |
| O  | 1.521405  | 1.229068  | 0.114464  |
| O  | -0.675646 | -0.231620 | -0.775589 |
| O  | -0.207767 | 2.264144  | -2.136599 |
| Mo | -2.309881 | -0.163839 | 0.577642  |
| O  | -1.698651 | 1.690139  | 0.354421  |
| O  | -3.809570 | -0.240029 | -0.169924 |
| O  | -1.628470 | -2.026035 | 0.559435  |
| O  | -2.537831 | -0.088716 | 2.243064  |

[Mo<sub>4</sub>O<sub>12</sub>] II 3/4

E = -32008.87

|    |           |           |           |
|----|-----------|-----------|-----------|
| Mo | 0.075366  | -2.120026 | 0.187222  |
| O  | -2.846689 | -0.000611 | -1.844829 |
| O  | -0.109429 | -3.136718 | -1.133416 |
| O  | 0.197189  | -3.065545 | 1.567429  |
| O  | 1.913609  | -1.582426 | -0.051219 |
| Mo | -2.716523 | -0.000329 | -0.165187 |
| Mo | 2.948841  | 0.000379  | -0.197276 |
| O  | 4.604796  | 0.000305  | -0.418946 |
| O  | -1.790800 | -1.513558 | 0.378208  |
| O  | 0.084707  | 0.000329  | 0.186329  |
| O  | -4.266924 | -0.000663 | 0.493168  |
| Mo | 0.074662  | 2.120056  | 0.187155  |
| O  | -1.791888 | 1.513240  | 0.377966  |
| O  | 0.194893  | 3.066995  | 1.566546  |
| O  | 1.913188  | 1.583095  | -0.049019 |
| O  | -0.109970 | 3.135138  | -1.134764 |

[Mo<sub>4</sub>O<sub>12</sub>] III 1/2

E = -32011.54

|    |           |           |           |
|----|-----------|-----------|-----------|
| Mo | -0.541462 | -0.012147 | -1.008767 |
| Mo | -4.057987 | -0.000337 | 0.399893  |
| Mo | 2.357311  | 1.724408  | 0.272656  |
| Mo | 2.372960  | -1.714280 | 0.281039  |
| O  | 3.276104  | 2.513167  | -0.889744 |
| O  | -2.114634 | -0.013400 | -0.177793 |
| O  | 3.296443  | -2.498227 | -0.880937 |
| O  | 0.660693  | 1.367915  | -0.347542 |
| O  | -4.127906 | -0.244551 | 2.087450  |
| O  | -4.712929 | 1.519515  | -0.021596 |
| O  | 0.671057  | -1.378296 | -0.336195 |
| O  | -4.860340 | -1.260115 | -0.428405 |
| O  | -0.520350 | -0.017498 | -2.674380 |
| O  | 2.322792  | 2.669628  | 1.657721  |
| O  | 2.351268  | -2.654890 | 1.669495  |
| O  | 3.070986  | 0.009125  | 0.631618  |

[Mo<sub>4</sub>O<sub>12</sub>] III 3/4

E = -32008.90

|    |           |           |           |
|----|-----------|-----------|-----------|
| Mo | -0.357291 | -0.277984 | 1.337797  |
| Mo | -3.620383 | -0.126140 | -0.492788 |
| Mo | 1.750730  | 1.929551  | -0.265740 |
| Mo | 2.525542  | -1.621028 | -0.442209 |
| O  | 1.397767  | 2.654015  | -1.748081 |
| O  | -2.013076 | -0.425257 | 0.313638  |
| O  | 2.086795  | -2.258469 | -1.951116 |
| O  | 0.161634  | 1.415933  | 0.604796  |
| O  | -4.439448 | 1.169561  | 0.210320  |
| O  | -3.459279 | 0.106732  | -2.154209 |
| O  | -0.631064 | -0.128994 | 2.979724  |
| O  | -4.747343 | -1.638177 | -0.283887 |
| O  | 0.957909  | -1.386973 | 0.790691  |
| O  | 2.636276  | 3.013420  | 0.676062  |
| O  | 3.826654  | -2.383309 | 0.333305  |
| O  | 2.655536  | 0.363424  | -0.490809 |

[Mo<sub>4</sub>O<sub>12</sub>] IV 1/2

E = -32011.23

|    |           |           |           |
|----|-----------|-----------|-----------|
| Mo | 0.490117  | 0.047199  | 0.812420  |
| Mo | 4.029005  | -0.082038 | -0.344599 |
| Mo | -2.259525 | 1.826382  | -0.246474 |
| Mo | -2.484757 | -1.840855 | -0.215991 |
| O  | -3.163665 | 2.714589  | 0.856432  |
| O  | 1.997540  | -0.066545 | -0.095339 |
| O  | -3.391229 | -2.583880 | 1.000609  |
| O  | -2.845978 | 0.121661  | -0.370063 |
| O  | -0.444912 | 1.580637  | 0.379059  |
| O  | 4.370114  | 0.083749  | -2.006590 |
| O  | 4.658187  | 1.233249  | 0.542033  |
| O  | -0.617735 | -1.272295 | 0.402793  |
| O  | 4.621590  | -1.564199 | 0.257925  |
| O  | 0.784193  | 0.027445  | 2.451174  |
| O  | -2.288370 | 2.606601  | -1.733070 |
| O  | -2.497650 | -2.622122 | -1.713083 |

[Mo<sub>4</sub>O<sub>12</sub>] V 1/2

E = -32010.81

|    |           |           |           |
|----|-----------|-----------|-----------|
| Mo | -0.405729 | -1.508618 | -0.030258 |
| Mo | -3.880338 | -0.014998 | -0.023627 |
| Mo | 0.869982  | 2.009412  | 0.017311  |
| Mo | 3.176090  | -0.513609 | 0.011415  |
| O  | 2.626663  | 1.294993  | 0.040600  |
| O  | 0.622818  | 2.948134  | -1.358413 |
| O  | -2.286578 | -0.905968 | -0.089943 |
| O  | 4.113405  | -0.840796 | -1.349239 |
| O  | 1.600337  | -1.408690 | -0.033458 |
| O  | -0.164091 | 0.521564  | 0.010269  |
| O  | -4.542406 | 0.421288  | 1.470885  |
| O  | -4.326289 | 1.016663  | -1.287427 |
| O  | 0.587103  | 2.957949  | 1.379566  |
| O  | 4.072639  | -0.897793 | 1.384463  |
| O  | -0.510236 | -2.500774 | -1.374370 |
| O  | -0.533387 | -2.460553 | 1.339154  |

[Mo<sub>4</sub>O<sub>12</sub>] V 3/4

E = -32008.63

|    |           |           |           |
|----|-----------|-----------|-----------|
| Mo | -0.530270 | -1.023159 | 0.846965  |
| Mo | -3.885763 | -0.007486 | -0.452214 |
| Mo | 1.359404  | 2.031438  | 0.162829  |
| Mo | 2.861332  | -0.980243 | -0.526215 |
| O  | 2.782126  | 0.906957  | -0.384033 |
| O  | 0.933786  | 3.099337  | -1.066325 |
| O  | -2.382855 | -0.534940 | 0.468406  |
| O  | 2.981745  | -1.444655 | -2.139754 |
| O  | 1.295810  | -1.527977 | 0.216448  |
| O  | 0.003226  | 0.876589  | 0.533923  |
| O  | -5.184706 | 0.684249  | 0.385040  |
| O  | -3.825046 | 0.394623  | -2.093616 |
| O  | 1.797433  | 2.922786  | 1.522266  |
| O  | 4.186298  | -1.595254 | 0.311034  |
| O  | -1.040507 | -2.449443 | -0.366982 |
| O  | -0.522001 | -1.440158 | 2.448929  |

[CH<sub>2</sub>Mo<sub>2</sub>O<sub>7</sub>] I 1/2

E = -19118.90

|   |          |          |          |
|---|----------|----------|----------|
| O | 2.631367 | 0.320831 | 1.374228 |
|---|----------|----------|----------|

O 2.631771 0.317697 -1.374380  
 Mo 1.692611 0.117307 -0.000007  
 O 0.556915 -1.388614 0.001503  
 O -2.582871 1.235659 -0.000096  
 O -1.936715 -1.035348 1.376676  
 Mo -1.148667 -0.506704 0.000073  
 O 0.085329 1.077477 -0.001032  
 O -1.936208 -1.036439 -1.376453  
 C -2.331364 2.419307 -0.000706  
 H -3.160811 3.135575 -0.000063  
 H -1.293343 2.773151 -0.002042

[CH<sub>2</sub>Mo<sub>2</sub>O<sub>7</sub>] I 3/4  
 E = -19115.67

O 2.535254 0.920050 1.207404  
 O 2.732214 -0.223620 -1.280159  
 Mo 1.698939 0.134088 -0.012548  
 O 0.565681 -1.277052 0.550536  
 O -2.537352 1.145270 -0.688409  
 O -2.042690 -0.396463 1.474825  
 Mo -1.120788 -0.515789 0.077259  
 O 0.082573 0.950836 -0.505809  
 O -1.847388 -1.537955 -1.023995  
 C -2.585237 2.343415 -0.178249  
 H -2.994795 2.381733 0.839978  
 H -1.682435 2.940708 -0.363495

[H<sub>3</sub>Mo<sub>4</sub>O<sub>13</sub>] I 1/2  
 E = -34108.96

Mo -2.756326 0.129384 0.375994  
 O -0.319790 -3.392618 0.780053  
 O -2.828348 0.164474 2.065706  
 O -4.321789 0.195198 -0.256501  
 O -1.721197 1.491802 -0.256228  
 Mo -0.054710 -1.979996 -0.497702  
 Mo 0.185896 1.949158 -0.487216  
 O 0.379646 2.475285 -2.046611  
 O -0.092205 3.438239 0.682013  
 O -1.888233 -1.422728 -0.160264  
 O 0.559771 -0.075399 -0.324682  
 O -0.010010 -2.554452 -2.050068  
 Mo 2.504018 0.010125 0.441042  
 O 1.872671 -2.011505 0.211071  
 O 3.862237 -0.116967 -0.540071  
 O 1.986332 1.788070 0.353204  
 O 2.956947 -0.249903 2.044270  
 H 0.728793 3.739523 1.081186  
 H -1.227925 -3.469839 1.083589  
 H 2.097971 -2.669809 0.871094

[H<sub>3</sub>Mo<sub>4</sub>O<sub>13</sub>] I 3/4  
 E = -34108.97

Mo -2.760560 0.128578 0.373564  
 O -0.316733 -3.386294 0.789733  
 O -2.837585 0.163798 2.063108  
 O -4.323754 0.193731 -0.264755  
 O -1.720947 1.488053 -0.257301  
 Mo -0.053995 -1.979813 -0.495542  
 Mo 0.184890 1.948751 -0.484912  
 O 0.380739 2.481437 -2.041784  
 O -0.093392 3.432976 0.690356  
 O -1.886888 -1.420466 -0.161522  
 O 0.564299 -0.075350 -0.330573  
 O -0.008369 -2.561483 -2.045177  
 Mo 2.506822 0.010980 0.438112  
 O 1.874616 -2.010261 0.211425  
 O 3.863281 -0.112898 -0.545820  
 O 1.985918 1.788142 0.355832  
 O 2.963594 -0.250675 2.040090  
 H 0.727161 3.729726 1.093849  
 H -1.224973 -3.465425 1.092340  
 H 2.098954 -2.666789 0.873574

[H<sub>3</sub>Mo<sub>4</sub>O<sub>13</sub>] II 1/2  
 E = -34108.41

Mo -2.568140 0.307934 -0.006858  
 O -0.600732 -3.301309 1.233773  
 O -2.925607 0.379349 1.637274

O -4.011488 0.595922 -0.817194  
 O -1.428207 1.728927 -0.570209  
 Mo -0.322368 -2.170790 0.055375  
 Mo 0.326890 2.258765 -0.150453  
 O 0.527281 3.754428 -0.883580  
 O 0.559511 2.483014 1.513506  
 O -2.045659 -1.381558 -0.551210  
 O -0.188616 -0.259533 0.816019  
 O -0.285540 -2.988121 -1.679178  
 Mo 2.590639 -0.377543 -0.069927  
 O 1.652019 -1.939125 -0.164447  
 O 4.136455 -0.412281 -0.707499  
 O 1.659887 1.170754 -0.817004  
 O 2.683986 0.321402 1.698792  
 H -0.042966 -0.173054 1.761617  
 H 2.184792 1.125980 1.895621  
 H -1.143033 -2.939249 -1.111349

[H<sub>3</sub>Mo<sub>4</sub>O<sub>13</sub>] II 1/2  
 E = -34108.52

Mo 2.91798 -0.00413 0.25265  
 O 0.03658 3.29584 1.18311  
 O 3.90132 -0.06852 1.62724  
 O 3.90597 0.21098 -1.10003  
 O 1.93068 -1.51686 0.09929  
 Mo -0.00851 1.72940 -0.41839  
 Mo -0.00527 -2.78344 -0.29914  
 O -0.05106 -2.95988 -1.56066  
 O 0.03835 -2.78344 1.40468  
 O 1.73497 1.45623 0.43309  
 O -0.04396 -0.05164 -0.97292  
 O -0.03007 2.65783 -1.79099  
 Mo -2.89158 0.01401 0.25846  
 O -1.72454 1.47256 0.50581  
 O -3.74593 0.19314 -1.18636  
 O -1.92307 -1.52887 0.26315  
 O -4.00066 -0.00906 1.53439  
 H -0.85308 -2.91112 1.74130  
 H 0.83469 3.08780 1.68577  
 H -0.73987 3.10374 1.72388

[H<sub>3</sub>Mo<sub>4</sub>O<sub>13</sub>] III 3/4  
 E = -34108.43

Mo -2.568521 0.305440 -0.004861  
 O -0.593409 -3.304064 1.230854  
 O -2.924547 0.376914 1.639592  
 O -4.012999 0.591713 -0.813823  
 O -1.430617 1.727436 -0.569862  
 Mo -0.319024 -2.171026 0.053773  
 Mo 0.324416 2.258881 -0.152017  
 O 0.522747 3.754189 -0.886448  
 O 0.558142 2.484773 1.511509  
 O -2.044430 -1.383275 -0.549575  
 O -0.186906 -0.259855 0.815755  
 O -0.284374 -2.985926 -1.682147  
 Mo 2.589994 -0.374539 -0.068820  
 O 1.653416 -1.937172 -0.167449  
 O 4.137741 -0.408745 -0.701669  
 O 1.658309 1.171855 -0.818811  
 O 2.680754 0.321846 1.701313  
 H -0.039317 -0.174325 1.761153  
 H 2.183597 1.127792 1.897569  
 H -1.143255 -2.938707 -2.111786

[H<sub>3</sub>Mo<sub>4</sub>O<sub>13</sub>] IV 1/2  
 E = -34108.37

Mo -0.315092 2.146340 -0.032304  
 O -2.900356 -0.250761 1.713569  
 O -0.570830 3.273653 1.153989  
 O -0.245720 2.997633 -1.748409  
 O 1.648714 1.879607 -0.298031  
 Mo -2.595312 -0.280950 0.057236  
 Mo 2.551400 0.312528 0.039433  
 O 4.114014 0.482152 -0.561647  
 O 2.653697 -0.027699 1.706083  
 O -2.041565 1.353424 -0.590533  
 O -0.176894 0.236131 0.766600  
 O -4.069756 -0.579528 -0.690883  
 Mo 0.283064 -2.275810 -0.245645  
 O -1.511397 -1.784140 -0.446133

O 0.630857 -3.729874 -0.977551  
 O 1.736460 -1.120214 -0.817332  
 O 0.861602 -2.415757 1.548175  
 H -0.036398 0.186197 1.716220  
 H 1.539594 -1.790879 1.849324  
 H 0.655665 3.199124 -2.014954

[H<sub>3</sub>Mo<sub>4</sub>O<sub>13</sub>] IV 3/4  
 E = -34108.37

Mo 0.313740 -2.146103 -0.032267  
 O 2.901694 0.248845 1.713040  
 O 0.568702 -3.272655 1.154935  
 O 0.244199 -2.998016 -1.748155  
 O -1.649547 -1.878297 -0.297808  
 Mo 2.596123 0.279654 0.056826  
 Mo -2.552296 -0.311082 0.039068  
 O -4.114704 -0.480126 -0.562825  
 O -2.655014 0.029272 1.705613  
 O 2.040445 -1.353915 -0.591053  
 O 0.176663 -0.235756 0.766725  
 O 4.070445 0.577206 -0.691988  
 Mo -0.281577 2.275146 -0.245031  
 O 1.512941 1.783972 -0.445056  
 O -0.628513 3.729457 -0.976849  
 O -1.736141 1.121269 -0.816981  
 O -0.860138 2.415467 1.548827  
 H 0.036508 -0.185652 1.716375  
 H -1.539131 1.791580 1.849682  
 H -0.657254 -3.199566 -2.014495

[H<sub>3</sub>Mo<sub>4</sub>O<sub>13</sub>] V 1/2  
 E = -34107.92

Mo 2.272940 0.194994 0.570614  
 O -0.483991 3.373980 0.415084  
 O 1.342138 -0.576361 2.131536  
 O 3.852822 0.302002 1.102210  
 O 2.073568 -1.373554 -0.460330  
 Mo -0.199845 2.052229 -0.583590  
 Mo 0.220121 -1.794205 -0.879370  
 O 0.196636 -2.185167 -2.495182  
 O 0.313352 -3.309485 0.314289  
 O 1.683566 1.815767 -0.208602  
 O -0.039099 0.048998 -0.215534  
 O -0.266189 2.544366 -2.184081  
 Mo -2.218827 -0.247864 0.587730  
 O -2.116565 1.331489 -0.283643  
 O -3.834900 -0.410435 0.980108  
 O -1.808253 -1.732204 -0.329939  
 O -1.359635 -0.220746 2.224107  
 H -0.558790 -3.667955 0.502278  
 H 1.374280 -1.540410 2.132281  
 H -0.367417 -0.277301 2.239095

[H<sub>3</sub>Mo<sub>4</sub>O<sub>13</sub>] V 3/4  
 E = -34107.95

Mo 2.297218 -0.195595 0.566875  
 O 0.050269 3.381041 0.195872  
 O 1.305610 0.182212 2.234790  
 O 3.910663 -0.105657 1.022178  
 O 1.806784 -1.761795 -0.261925  
 Mo 0.177136 1.962131 -0.698079  
 Mo -0.124854 -1.875442 -0.774429  
 O -0.153879 -2.167124 -2.408058  
 O -0.295922 -3.467513 0.284293  
 O 1.967627 1.472079 -0.377562  
 O -0.016513 -0.015839 -0.121902  
 O 0.110640 2.341638 -2.332211  
 Mo -2.245982 0.128514 0.603261  
 O -1.883345 1.567712 -0.382588  
 O -3.873544 0.230866 0.971606  
 O -2.066552 -1.474913 -0.223357  
 O -1.418349 0.162776 2.258034  
 H -1.208513 -3.666488 0.510857  
 H 1.739781 -0.098189 3.041658  
 H -0.426918 0.177278 2.273694

[H<sub>3</sub>Mo<sub>4</sub>O<sub>13</sub>] VI 1/2  
 E = -34107.74

Mo 0.787264 -2.158598 -0.226212  
 O 2.586863 0.548277 1.693269  
 O 1.476442 -2.295430 1.530033  
 O 1.408970 -3.444131 -1.086390  
 O -1.096560 -2.211820 -0.329999  
 Mo 2.338270 0.813102 0.034558  
 Mo -2.338284 -0.813210 0.034505  
 O -3.779379 -1.411447 -0.587219  
 O -2.586826 -0.548355 1.693224  
 O 2.064683 -0.784779 -0.835940  
 O 0.000174 -0.000041 0.584686  
 O 3.779339 1.411463 -0.587103  
 Mo -0.787278 2.158736 -0.226229  
 O 1.096473 2.211597 -0.330475  
 O -1.409055 3.444567 -1.085897  
 O 2.064607 0.784769 -0.835778  
 O -1.476378 2.295199 1.530107  
 H -0.000256 0.000146 1.546510  
 H -1.964832 1.530043 1.867598  
 H 1.965157 -1.530433 1.867616

[H<sub>3</sub>Mo<sub>4</sub>O<sub>13</sub>] VI 3/4  
 E = -34107.73

Mo 0.801133 -2.155661 -0.221348  
 O 2.575973 0.572259 1.690960  
 O 1.479682 -2.275128 1.540493  
 O 1.437879 -3.443998 -1.066799  
 O -1.081690 -2.207225 -0.355613  
 Mo 2.334584 0.824538 0.029244  
 Mo -2.334563 -0.824509 0.029203  
 O -3.774409 -1.430770 -0.587461  
 O -2.576303 -0.572275 1.690861  
 O 2.075328 -0.778321 -0.835389  
 O -0.000214 0.000016 0.581273  
 O 3.774554 1.430767 -0.587148  
 Mo -0.801146 2.155652 -0.221234  
 O 1.081711 2.207150 -0.355802  
 O -1.437993 3.443980 -1.066640  
 O -2.075258 0.778350 -0.835478  
 O -1.479444 2.275116 1.540729  
 H 0.000279 0.000136 1.543063  
 H -1.955998 1.502929 1.879579  
 H 1.956882 -1.503277 1.879186

[H<sub>3</sub>Mo<sub>4</sub>O<sub>13</sub>] VII 1/2  
 E = -34107.71

Mo -2.384186 0.408112 -0.093192  
 O 0.021048 -2.579517 1.784731  
 O -3.006549 0.579192 1.454139  
 O -3.669178 0.609465 -1.157926  
 O -1.376796 1.965712 -0.560993  
 Mo -0.459169 -2.376927 -0.046342  
 Mo 0.391879 2.353291 -0.025781  
 O 0.648875 3.897925 -0.631718  
 O 0.602606 2.449289 1.654703  
 O -2.046796 -1.463268 -0.440391  
 O -0.237697 -0.025576 0.581712  
 O -0.531978 -3.913549 -0.691385  
 Mo 2.397593 -0.420910 -0.238298  
 O 1.348609 -1.878199 -0.629356  
 O 3.965681 -0.518459 -0.804754  
 O 1.741877 1.325613 -0.779558  
 O 2.483887 -0.087105 1.643202  
 H -0.208015 0.005224 1.542329  
 H 2.107437 0.747260 1.953982  
 H 0.814934 -2.114431 2.076221

[H<sub>3</sub>Mo<sub>4</sub>O<sub>13</sub>] VII 3/4  
 E = -34107.73

Mo 2.337590 -0.612062 -0.089658  
 O 0.226953 2.585544 1.783342  
 O 2.935450 -0.824780 1.462171  
 O 3.605766 -0.932026 -1.145668  
 O 1.201523 -2.079072 -0.556794  
 Mo 0.664690 2.331927 -0.051199  
 Mo -0.595240 -2.314753 -0.029909  
 O -0.984629 -3.830165 -0.638771  
 O -0.819262 -2.392683 1.649969  
 O 2.160759 1.276580 -0.453684

O 0.234490 0.009091 0.581328  
 O 0.870323 3.851253 -0.708582  
 Mo -2.349566 0.624419 -0.234966  
 O -1.186071 2.000131 -0.599754  
 O -3.903179 0.865488 -0.797765  
 O -1.845413 -1.170329 -0.786236  
 O -2.474737 0.286678 1.643979  
 H 0.196014 -0.023154 1.541572  
 H -2.180648 -0.582936 1.947041  
 H -0.605047 2.200085 2.083838

[H<sub>3</sub>Mo<sub>4</sub>O<sub>13</sub>] VIII 1/2  
 E = -34107.39

Mo -0.034791 2.187648 -0.143174  
 O -2.726065 0.461750 1.722045  
 O -0.089552 2.384364 1.542054  
 O -0.071170 3.713340 -0.846879  
 O 1.535231 1.367470 -0.675734  
 Mo -2.704884 -0.126597 -0.077125  
 Mo 2.702184 -0.061222 -0.069646  
 O 4.195546 0.215490 -0.774195  
 O 2.749738 0.450896 1.759116  
 O -1.537257 1.261679 -0.732563  
 O 0.075088 -0.519062 0.932722  
 O -4.199899 0.113298 -0.784071  
 Mo -0.005818 -2.018568 0.077375  
 O -1.935051 -1.802479 -0.244904  
 O 0.039146 -2.442912 -1.803018  
 O 1.979914 -1.721974 -0.342341  
 O 0.098097 -3.321224 1.124087  
 H 1.973228 0.920409 2.088234  
 H 0.918482 -2.424857 -2.185657  
 H -1.982853 1.006474 2.014815

[H<sub>3</sub>Mo<sub>4</sub>O<sub>13</sub>] VIII 3/4  
 E = -34107.36

Mo -0.037591 2.191786 -0.153181  
 O -2.699241 0.451378 1.734244  
 O -0.093404 2.397057 1.530553  
 O -0.073874 3.714828 -0.862471  
 O 1.534600 1.372334 -0.677029  
 Mo -2.700147 -0.129967 -0.067345  
 Mo 2.697224 -0.061220 -0.060325  
 O 4.198265 0.221906 -0.744855  
 O 2.727579 0.450235 1.769051  
 O -1.540431 1.264835 -0.735925  
 O 0.073203 -0.517903 0.921975  
 O -4.204550 0.113840 -0.752137  
 Mo -0.002483 -2.020371 0.068806  
 O -1.929522 -1.802311 -0.265768  
 O 0.043152 -2.452851 -1.810693  
 O 1.979338 -1.722290 -0.352057  
 O 0.095473 -3.321676 1.117809  
 H 1.948213 0.918866 2.092365  
 H 0.923592 -2.434421 -2.190887  
 H -1.950652 0.990926 2.022844

[H<sub>3</sub>Mo<sub>4</sub>O<sub>13</sub>] XI 1/2  
 E = -34106.97

Mo -3.212776 -1.553131 -0.201889  
 O -3.960799 -0.640899 1.272245  
 O -1.815548 -2.636222 0.330623  
 O -4.410788 -2.237559 -1.137088  
 Mo -1.943783 1.717493 -0.509902  
 Mo 0.949625 0.416764 1.078755  
 O 0.076739 -1.032519 1.352741  
 O 1.288966 1.162013 2.545854  
 O 2.448834 0.102960 0.179319  
 O -0.166224 1.554337 0.008939  
 O -2.885064 2.188369 0.813838  
 O -2.121336 2.847933 -1.736424  
 O -2.536487 0.054132 -1.050425  
 Mo 4.239053 -0.388167 -0.604927  
 O 4.109539 -1.256220 -2.062687  
 O 5.342777 0.906442 -0.623906  
 O 4.583568 -1.579029 0.890466  
 H -1.039349 -2.240760 0.792795  
 H 3.907223 -1.648872 1.567774  
 H -3.850261 0.315458 1.365889

[H<sub>3</sub>Mo<sub>4</sub>O<sub>13</sub>] IX 3/4  
 E = -34106.97

Mo -3.210210 -1.555398 -0.199111  
 O -3.961951 -0.640865 1.271569  
 O -1.812738 -2.635541 0.339006  
 O -4.405697 -2.243708 -1.134726  
 Mo -1.944724 1.715774 -0.512637  
 Mo 0.949507 0.423216 1.076934  
 O 0.074207 -1.023025 1.359301  
 O 1.292220 1.175147 2.539819  
 O 2.446815 0.102435 0.176693  
 O -0.165588 1.557170 0.002441  
 O -2.884348 2.185277 -0.128242  
 O -2.127118 2.845194 -1.739362  
 O -2.534986 0.050766 -1.050758  
 Mo 4.237831 -0.391142 -0.604086  
 O 4.109904 -1.263694 -2.059307  
 O 5.341280 0.903604 -0.625949  
 O 4.581012 -1.577248 0.895408  
 H -1.038231 -2.237371 0.801500  
 H 3.903858 -1.645118 1.572114  
 H -3.850680 0.315522 1.364354

[H<sub>3</sub>Mo<sub>4</sub>O<sub>13</sub>] X 1/2  
 E = -34106.93

Mo -3.379752 -1.334980 -0.277147  
 O -3.895938 -0.945952 1.287943  
 O -2.085022 -2.662160 -0.249439  
 O -4.687879 -1.873556 -1.178456  
 Mo -1.850195 1.828245 -0.303936  
 Mo 0.961383 0.014444 0.854779  
 O -0.077186 -1.339115 0.994208  
 O 1.528104 0.463318 2.375319  
 O 2.326601 -0.343820 -0.219213  
 O -0.070801 1.450685 0.105484  
 O -2.861394 1.876448 1.282624  
 O -2.240113 3.101473 -1.303513  
 O -2.659046 0.222272 -0.988109  
 Mo 4.341423 -0.280424 -0.544709  
 O 4.890336 -1.557111 -1.526934  
 O 4.895473 1.273478 -0.967715  
 O 4.645993 -0.633338 1.339984  
 H -1.278377 -2.441076 0.265797  
 H 3.931396 -0.468578 1.961405  
 H -3.386081 1.102747 1.537843

[H<sub>3</sub>Mo<sub>4</sub>O<sub>13</sub>] X 3/4  
 E = -34106.94

Mo -3.361746 -1.352885 -0.265721  
 O -3.889957 -0.952441 1.292443  
 O -2.051904 -2.664704 -0.215826  
 O -4.659029 -1.917111 -1.166912  
 Mo -1.861154 1.823661 -0.321650  
 Mo 0.961082 0.051882 0.856200  
 O -0.079301 -1.295440 1.038272  
 O 1.541398 0.538337 2.360054  
 O 2.317573 -0.335701 -0.219531  
 O -0.073946 1.470005 0.076702  
 O -2.862711 1.867881 1.271029  
 O -2.271570 3.087285 -1.325518  
 O -2.655154 0.203946 -0.991596  
 Mo 4.331954 -0.296552 -0.543837  
 O 4.869794 -1.596271 -1.501510  
 O 4.900370 1.243644 -0.996400  
 O 4.634679 -0.616357 1.346837  
 H -1.253919 -2.428353 0.305868  
 H 3.926182 -0.423881 1.967322  
 H -3.379898 1.091194 1.532733

[H<sub>3</sub>Mo<sub>4</sub>O<sub>13</sub>] XI 1/2  
 E = -34106.65

Mo -0.443980 -0.955249 -0.294181  
 Mo -4.158335 -0.045885 0.197542  
 Mo 1.705280 2.000421 -0.051583  
 Mo 3.232646 -1.067374 0.246096  
 O 3.178009 0.815702 -0.032440  
 O 1.924862 3.181641 -1.234504



[Mo<sub>2</sub>O<sub>7</sub>] I 1/2  
E = -18046.39  
O -2.329493 -1.504192 0.569812  
O -2.457411 0.176935 -1.581086  
Mo -1.869994 -0.010080 -0.025200  
O -2.703361 1.294258 1.037573  
O 2.329612 -1.505488 -0.566309  
O 2.457084 0.180634 1.580782  
Mo 1.870002 -0.010048 0.025200  
O 0.000003 0.171613 -0.000385  
O 2.703525 1.291908 -1.040385

[Mo<sub>2</sub>O<sub>7</sub>] I 3/4  
E = -18046.39  
O -2.328898 -1.503865 0.571068  
O -2.458340 0.175695 -1.580913  
Mo -1.870015 -0.010103 -0.025238  
O -2.702946 1.294980 1.036995  
O 2.330080 -1.505442 -0.566037  
O 2.456224 0.180661 1.581035  
Mo 1.870004 -0.010031 0.025150  
O 0.000010 0.171785 -0.001468  
O 2.703928 1.291890 -1.040218

[Mo<sub>2</sub>O<sub>7</sub>] II 1/2  
E = -18045.68  
O -2.510212 1.372408 0.079852  
O -0.010276 0.000078 1.262220  
Mo -1.554357 0.000073 0.038759  
O 1.669735 1.577744 -0.844830  
O -2.509323 -1.372848 0.079248  
Mo 1.391497 0.000014 0.071126  
O 2.815562 0.000380 0.954491  
O 1.669011 -1.578633 -0.843878  
O -0.269479 0.000415 -1.263996

[Mo<sub>2</sub>O<sub>7</sub>] II 3/4  
E = -18045.72  
O -2.511893 1.372486 0.082675  
O -0.006256 0.000407 1.259538  
Mo -1.555773 0.000037 0.039326  
O 2.824141 -0.000951 0.951993  
O -2.511614 -1.372711 0.082930  
Mo 1.392500 0.000022 0.067819  
O 1.670401 -1.577160 -0.836213  
O 1.671720 1.577520 -0.835469  
O -0.279315 0.000100 -1.267965

[MoO<sub>4</sub>] I 1/2  
E = -10044.06  
Mo -0.000361 0.023537 0.000105  
O -1.572212 -1.017343 0.001190  
O -0.003590 0.972678 -1.382438  
O 0.015455 0.952088 1.396489  
O 1.562241 -1.030992 -0.015794

[MoO<sub>4</sub>] I 3/4  
E = -10044.07  
Mo -0.000060 -0.020699 0.000151  
O 1.566968 1.020028 -0.025617  
O -1.571819 1.014048 -0.000340  
O -0.011646 -0.980953 -1.376799  
O 0.016814 -0.944451 1.401962

[Mo<sub>2</sub>O<sub>3</sub>] I 1/2  
E = -13953.61  
Mo -1.523799 0.176138 0.000024  
Mo 1.278647 -0.043491 -0.000007  
O -0.105546 0.195053 -1.286286  
O -0.105466 0.195831 1.286260  
O -2.940131 -0.685200 -0.000090  
O 2.447385 1.156817 -0.000385  
O 1.990803 -1.558901 0.000408

[Mo<sub>2</sub>O<sub>3</sub>] I 3/4  
E = -13953.08  
Mo -1.526531 0.224354 -0.000453  
Mo 1.333380 -0.049948 0.000094  
O -0.330429 0.097448 -1.312670  
O -0.330509 0.102064 1.312155  
O -2.784541 -0.873168 0.001875  
O 2.343519 1.293372 -0.001063  
O 2.116003 -1.535346 0.001587

[Mo<sub>2</sub>O<sub>3</sub>] I 5/6  
E = -13950.49  
Mo -1.518325 -0.195464 -0.000067  
Mo 1.304662 0.050934 0.000031  
O -0.070013 -0.183439 -1.278738  
O -0.070289 -0.184570 1.278448  
O -3.239133 0.698886 0.000239  
O 2.017418 1.569245 0.000526  
O 2.483752 -1.141341 -0.000284

[Mo<sub>2</sub>O<sub>3</sub>] I 7/8  
E = -13947.72  
Mo -1.572970 -0.015525 0.000132  
Mo 1.302515 0.027752 -0.000131  
O 0.123761 -0.011119 -1.318175  
O 0.123296 -0.017016 1.317327  
O -3.567008 -0.020058 -0.000231  
O 2.247693 1.416077 0.003273  
O 2.492149 -1.432081 -0.002198

**Table S5:** Energies of calculated structures on the M06/def2TZVP level of theory. See Figures for the respective structures.

| Ion                                              | Isomer | Singlet/Douplet | Triplet/Quartet | Pentet/Hextet |
|--------------------------------------------------|--------|-----------------|-----------------|---------------|
| [MoO <sub>4</sub> ] <sup>-</sup>                 | I      | 0.00            | 3.20            | -             |
|                                                  | II     | 3.41            | 3.99            | -             |
| [Mo <sub>2</sub> O <sub>8</sub> ] <sup>2-</sup>  | I      | 0.00            | 2.09            | -             |
|                                                  | II     | 2.20            | 1.56            | -             |
|                                                  | III    | 1.87            | 1.87            | -             |
| [Mo <sub>3</sub> O <sub>9</sub> ] <sup>-</sup>   | I      | 0.00            | 3.09            | -             |
|                                                  | II     | 0.16            | 3.38            | -             |
| [Mo <sub>2</sub> O <sub>6</sub> ]                | I      | 0.00            | 2.68            | -             |
| [Mo <sub>2</sub> O <sub>5</sub> ] <sup>-</sup>   | I      | 0.00            | 0.22            | 3.46          |
| [Mo <sub>2</sub> O <sub>6</sub> ] <sup>-</sup>   | I      | 0.00            | 3.52            | -             |
| [Mo <sub>2</sub> O <sub>7</sub> ] <sup>-</sup>   | I      | 0.00            | 2.91            | 5.64          |
|                                                  | II     | 0.17            | 3.21            | -             |
| [Mo <sub>2</sub> O <sub>8</sub> ] <sup>-</sup>   | I      | 0.00            | 2.90            | -             |
|                                                  | II     | 2.45            | 2.38            | -             |
|                                                  | III    | 2.50            | 2.50            | -             |
| [Mo <sub>4</sub> O <sub>13</sub> ] <sup>2-</sup> | I      | 0.00            | 2.52            | -             |
|                                                  | II     | 0.41            | -               | -             |
|                                                  | III    | 0.60            | 3.30            | -             |
|                                                  | IV     | 0.60            | 4.47            | -             |
|                                                  | V      | 0.78            | 3.19            | -             |
|                                                  | VI     | 0.95            | 2.90            | -             |
|                                                  | VII    | 2.87            | 3.80            | -             |
|                                                  | VIII   | 3.25            | 3.25            | -             |
| [Mo <sub>2</sub> O <sub>5</sub> ]                | I      | 0.02            | 0.00            | -             |
| [MoO <sub>3</sub> ]                              | I      | 0.00            | 1.80            | -             |
| [Mo <sub>3</sub> O <sub>10</sub> ] <sup>-</sup>  | I      | 0.00            | 2.79            | -             |
|                                                  | II     | 0.56            | 2.76            | -             |
|                                                  | III    | 0.68            | 3.21            | -             |
|                                                  | IV     | 1.40            | 3.86            | -             |
| [Mo <sub>2</sub> O <sub>7</sub> ]                | I      | 0.00            | -               | -             |
|                                                  | II     | 1.05            | 1.05            | -             |
|                                                  | III    | 1.60            | 1.56            | -             |
| [Mo <sub>3</sub> O <sub>10</sub> ] <sup>2-</sup> | I      | 0.00            | 3.18            | -             |
|                                                  | II     | 0.85            | 3.34            | -             |
|                                                  | III    | 0.85            | 3.56            | -             |

|                                                 |    |      |      |      |
|-------------------------------------------------|----|------|------|------|
|                                                 | IV | 4.40 | 2.94 | -    |
|                                                 | V  | 3.90 | 4.16 | -    |
| [Mo <sub>3</sub> O <sub>9</sub> ]               | I  | 0.00 | 3.12 | -    |
|                                                 | II | 1.22 | 3.46 | -    |
| [Mo <sub>2</sub> O <sub>7</sub> ] <sup>2-</sup> | I  | 0.00 | 3.37 | 6.44 |
| [MoO <sub>3</sub> ] <sup>-</sup>                | I  | 0.00 | 2.90 | -    |
| [Mo <sub>2</sub> O <sub>6</sub> ] <sup>2-</sup> | I  | 0.00 | 0.45 | -    |



Calculated structures on the M06/def2TZVP level of theory

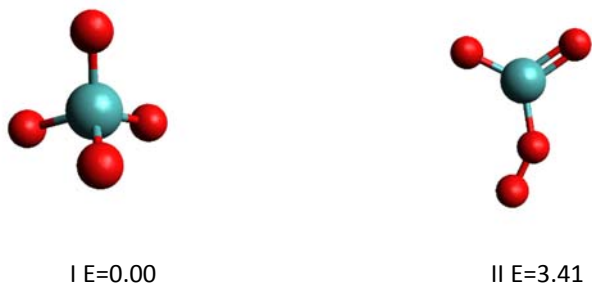

Figure S4.1: Calculated Molecules of  $[\text{MoO}_4]^-$  in lowest multiplicity unless marked with \*.

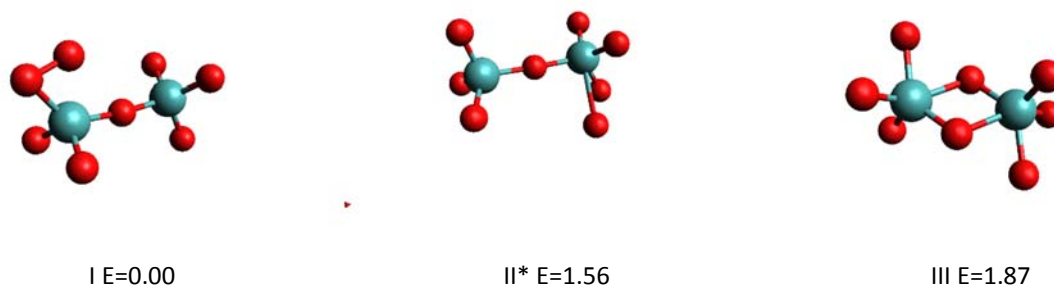

Figure S4.2: Calculated Molecules of  $[\text{Mo}_2\text{O}_8]^{2-}$  in lowest multiplicity unless marked with \*.

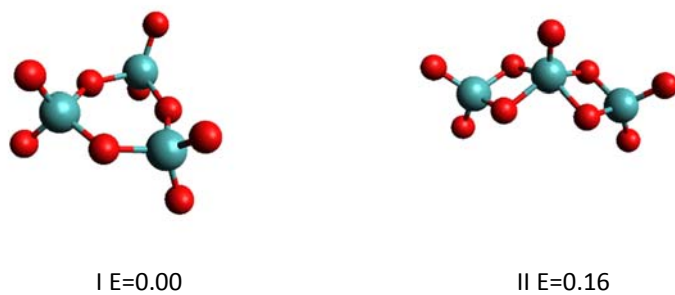

Figure S4.3: Calculated Molecules of  $[\text{Mo}_3\text{O}_9]^-$  in lowest multiplicity unless marked with \*.

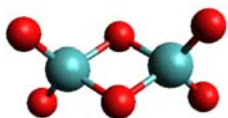

I E=0.00

Figure S4.4: Calculated Molecules of  $[\text{Mo}_2\text{O}_6]$  in lowest multiplicity unless marked with \*.

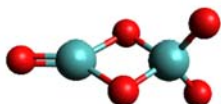

I E=0.00

Figure S4.5: Calculated Molecules of  $[\text{Mo}_2\text{O}_5]^-$  in lowest multiplicity unless marked with \*.

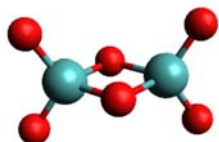

I E=0.00

Figure S4.6: Calculated Molecules of  $[\text{Mo}_2\text{O}_6]^-$  in lowest multiplicity unless marked with \*.

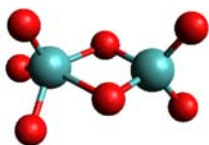

I E=0.00

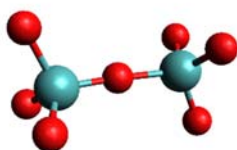

II E=0.17

Figure S4.7: Calculated Molecules of  $[\text{Mo}_2\text{O}_7]^-$  in lowest multiplicity unless marked with \*.

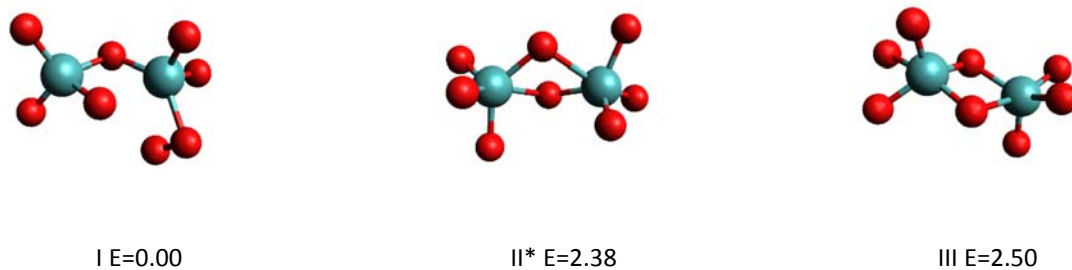

Figure S4.8: Calculated Molecules of  $[\text{Mo}_2\text{O}_8]^{2-}$  in lowest multiplicity unless marked with \*.

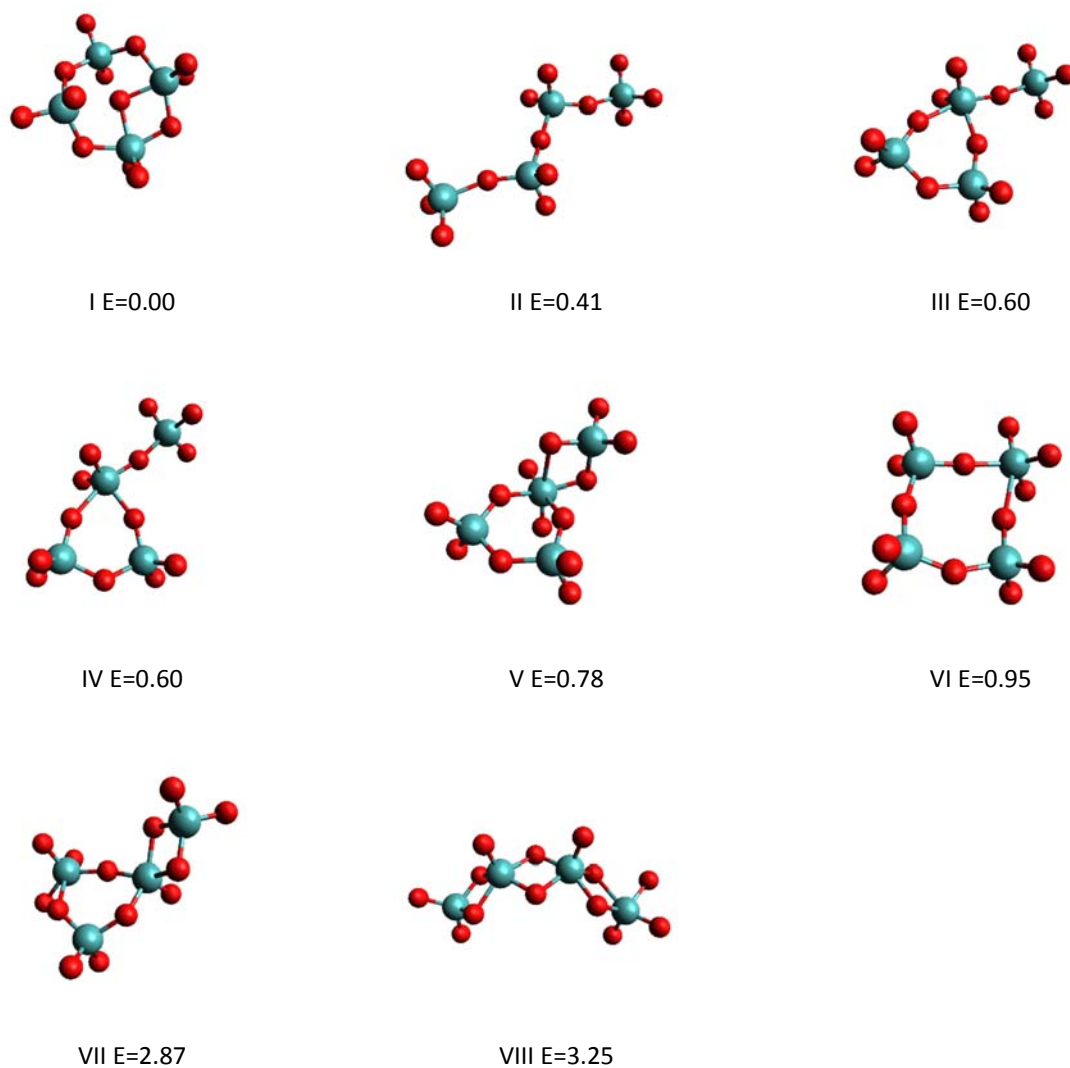

Figure S4.9: Calculated Molecules of  $[\text{Mo}_4\text{O}_{13}]^{2-}$  in lowest multiplicity unless marked with \*.

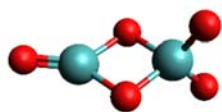

I\* E=0.00

Figure S4.10: Calculated Molecules of  $[\text{Mo}_2\text{O}_5]$  in lowest multiplicity unless marked with \*.

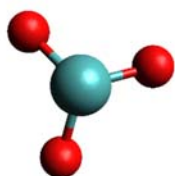

I E=0.00

Figure S4.11: Calculated Molecules of  $[\text{MoO}_3]$  in lowest multiplicity unless marked with \*.

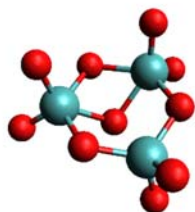

I E=0.00

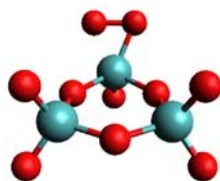

II E=0.56

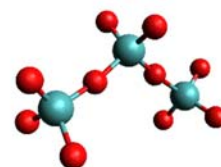

III E=0.68

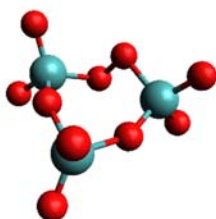

IV E=1.40

Figure S4.12: Calculated Molecules of  $[\text{Mo}_3\text{O}_{10}]^-$  in lowest multiplicity unless marked with \*.

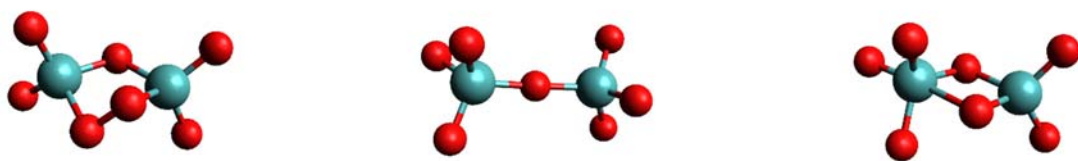

I E=0.00

II E=1.05

III\* E=1.56

Figure S4.13: Calculated Molecules of  $[\text{Mo}_2\text{O}_7]$  in lowest multiplicity unless marked with \*.

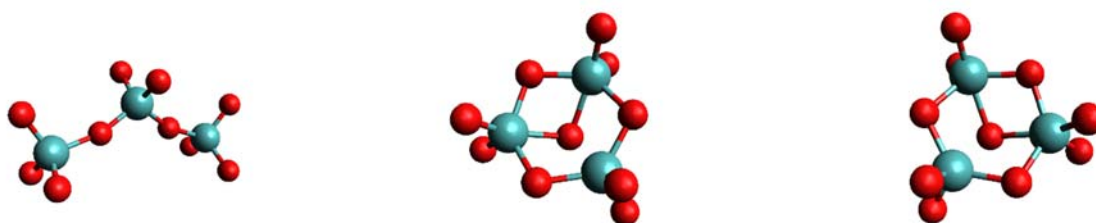

I E=0.00

II E=0.85

III E=0.85

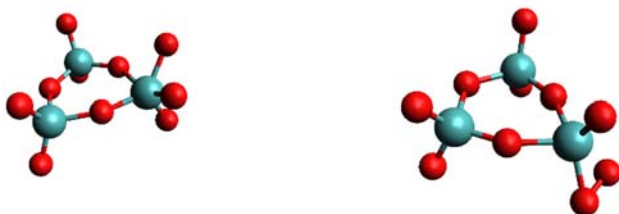

IV\* E=2.94

V E=3.90

Figure S4.14: Calculated Molecules of  $[\text{Mo}_3\text{O}_{10}]^{2-}$  in lowest multiplicity unless marked with \*.

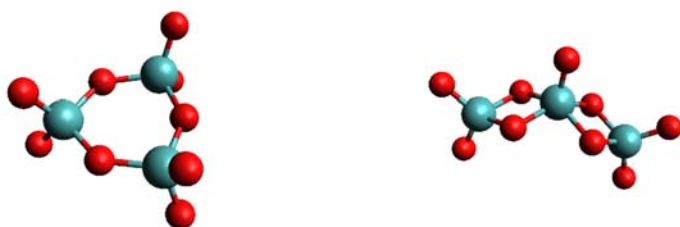

I E=0.00

II E=1.22

Figure S4.15: Calculated Molecules of  $[\text{Mo}_3\text{O}_9]$  in lowest multiplicity unless marked with \*.

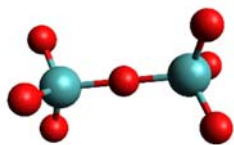

| E=0.00

Figure S4.16: Calculated Molecules of  $[\text{Mo}_2\text{O}_7]^{2-}$  in lowest multiplicity unless marked with \*.

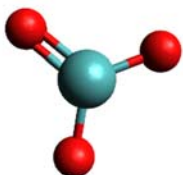

| E=0.00

Figure S4.17: Calculated Molecules of  $[\text{MoO}_3]^-$  in lowest multiplicity unless marked with \*.

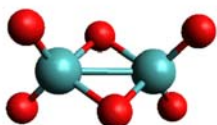

| E=0.00

Figure S4.18: Calculated Molecules of  $[\text{Mo}_2\text{O}_6]^{2-}$  in lowest multiplicity unless marked with \*.

Cartesian coordinates (in Ångstrom) of species optimized at the M06/def2TZVP level of theory along the respective ZPE-corrected energy (in eV)

[MoO<sub>4</sub>] I 1/2

E = -10046.92  
 Mo -0.039945 -0.004273 0.001240  
 O -0.898411 0.842776 1.230894  
 O -0.898999 0.077302 -1.489276  
 O 1.723282 0.750670 -0.211360  
 O 0.283840 -1.648315 0.463233

[MoO<sub>4</sub>] I 3/4

E = -10043.72  
 Mo -0.158060 0.000009 0.010131  
 O 1.402610 0.002414 -1.162521  
 O 1.536938 -0.002044 1.083867  
 O -1.055098 1.469004 0.014445  
 O -1.054636 -1.469423 0.011024

[MoO<sub>4</sub>] II 1/2

E = -10043.51  
 Mo 0.331928 0.006218 -0.000047  
 O 0.997349 1.592422 0.000084  
 O 1.403968 -1.340948 0.000122  
 O -1.456601 -0.389933 -0.000056  
 O -2.687337 0.105816 0.000095

[MoO<sub>4</sub>] II 3/4

E = -10042.93  
 Mo 0.335024 0.000002 -0.036200  
 O 1.117660 1.532566 0.131898  
 O 1.121515 -1.530630 0.132281  
 O -1.660909 -0.001203 -0.599433  
 O -2.337141 -0.000743 0.525302

[Mo<sub>2</sub>O<sub>8</sub>] I 1/2

E = -20093.70  
 Mo 2.021613 0.021579 0.000068  
 Mo -1.774121 -0.190522 0.000111  
 O -1.763173 1.769293 0.000887  
 O 0.128502 -0.187157 0.002767  
 O -2.194577 -1.070386 -1.408493  
 O -2.198181 -1.071310 1.407083  
 O 2.532863 0.883732 -1.407764  
 O 2.763896 -1.540766 -0.000613  
 O -3.105061 1.219401 -0.001196  
 O 2.536396 0.884140 1.406386

[Mo<sub>2</sub>O<sub>8</sub>] I 3/4

E = -20091.61  
 Mo -1.995393 -0.006758 0.000421  
 Mo 1.801325 -0.275639 0.000075  
 O 2.064878 1.812880 0.656087  
 O -0.104018 0.032365 0.006199  
 O 2.381492 -1.058255 1.420060  
 O 2.374397 -1.056331 -1.423764  
 O -2.604639 0.707786 1.455788  
 O -2.556604 -1.642852 -0.097334  
 O 2.061861 1.813128 -0.655906  
 O -2.598514 0.873863 -1.363731

[Mo<sub>2</sub>O<sub>8</sub>] II 1/2

E = -20091.50  
 Mo -1.463771 -0.000008 -0.000107  
 Mo 1.610638 -0.000054 -0.000025  
 O 0.422939 0.123455 1.358707  
 O 2.630666 -1.390534 0.144281  
 O -0.927276 -1.831124 -0.322263  
 O -0.925735 1.830974 0.322061

O -2.510305 -0.433436 1.284248  
 O 2.629147 1.391401 -0.145435  
 O -2.511743 0.434169 -1.283063  
 O 0.421259 -0.124583 -1.357845

[Mo<sub>2</sub>O<sub>8</sub>] II 3/4

E = -20092.14  
 Mo 1.797370 -0.223149 -0.006935  
 Mo -1.998299 -0.008186 0.003135  
 O -2.608036 -0.319105 1.589807  
 O -2.532905 1.552930 -0.506056  
 O 1.662760 2.318715 -0.053219  
 O 2.141938 -1.839957 0.454575  
 O 2.647493 0.788768 1.180065  
 O -2.624658 -1.196906 -1.083040  
 O 2.458375 -0.012259 -1.581314  
 O -0.090090 -0.077676 0.019133

[Mo<sub>2</sub>O<sub>8</sub>] III 1/2

E = -20091.83  
 Mo 1.565641 0.097191 -0.010741  
 Mo -1.565748 -0.097323 0.010783  
 O -0.170699 -0.845588 -0.900609  
 O -2.875427 -0.153855 -1.121043  
 O -2.031977 -1.084481 1.330829  
 O 2.028655 1.084422 -1.331848  
 O 2.020643 -1.777710 -0.288782  
 O -2.018604 1.777956 0.289762  
 O 2.876917 0.155542 1.119214  
 O 0.171056 0.844406 0.902258

[Mo<sub>2</sub>O<sub>8</sub>] III 3/4

E = -20091.83  
 Mo 1.565852 0.097365 -0.010500  
 Mo -1.565838 -0.097418 0.010469  
 O -0.172674 -0.839754 -0.906902  
 O -2.879008 -0.149704 -1.117500  
 O -2.028434 -1.090514 1.327354  
 O 2.027048 1.090109 -1.328142  
 O 2.019611 -1.777504 -0.293986  
 O -2.018899 1.777564 0.295150  
 O 2.879538 0.150939 1.116854  
 O 0.172747 0.839143 0.907337

[Mo<sub>3</sub>O<sub>9</sub>] I 1/2

E = -24003.41  
 Mo -2.177189 -0.000242 -0.000007  
 O -0.723082 1.355504 0.005406  
 O -0.722705 -1.355600 -0.005678  
 O -3.095329 -0.005154 1.427850  
 O -3.095541 0.004489 -1.427727  
 Mo 1.061471 1.710283 0.000439  
 O 1.504184 2.584546 -1.377058  
 O 1.511203 2.587565 1.373729  
 O 1.887210 0.000220 -0.000015  
 Mo 1.061899 -1.710061 -0.000448  
 O 1.504617 -2.584104 1.377187  
 O 1.511995 -2.587360 -1.373610

[Mo<sub>3</sub>O<sub>9</sub>] I 3/4

E = -24000.32  
 Mo -1.008335 -1.735187 -0.070090  
 O -1.871596 -0.043261 -0.158423  
 O 0.752832 -1.338984 0.029132  
 O -1.525209 -2.602161 1.287412  
 O -1.345898 -2.649533 -1.453790

Mo -1.109209 1.681029 0.035140  
 O -1.768799 2.775804 -1.071251  
 O -1.381294 2.255857 1.603524  
 O 0.671924 1.450014 -0.260030  
 Mo 2.168486 0.139148 -0.056547  
 O 2.772424 -0.718022 1.626210  
 O 3.428168 0.424088 -1.122428

[Mo<sub>3</sub>O<sub>9</sub>] II 1/2

E = -24003.25  
 Mo -0.000190 -0.717041 -0.000097  
 Mo -2.653342 0.356195 0.000068  
 O -1.392994 -0.064910 1.295087  
 O -1.391328 -0.061744 -1.294799  
 O -0.000705 -2.372463 0.000063  
 O -3.141550 1.981060 0.001886  
 O -4.016150 -0.655270 -0.002132  
 O 1.394069 -0.066357 -1.295368  
 O 1.390884 -0.061513 1.294473  
 Mo 2.653467 0.355998 -0.000019  
 O 4.017076 -0.654381 0.003689  
 O 3.141040 1.981032 -0.002645

[Mo<sub>3</sub>O<sub>9</sub>] II 3/4

E = -24000.03  
 Mo 0.046892 -0.791064 0.000013  
 Mo -2.712513 0.360721 -0.000032  
 O -1.376895 -0.135663 1.219697  
 O -1.377020 -0.135924 -1.219746  
 O 0.060728 -2.453560 -0.000063  
 O -3.106124 2.254058 -0.000085  
 O -4.025043 -0.697423 0.000226  
 O 1.410838 -0.067115 -1.303071  
 O 1.411248 -0.068128 1.303186  
 Mo 2.644500 0.396103 0.000015  
 O 4.049649 -0.560083 -0.000584  
 O 3.063507 2.043592 0.000467

[Mo<sub>2</sub>O<sub>6</sub>] I 1/2

E = -15998.84  
 Mo -1.427378 -0.000078 -0.000019  
 Mo 1.427358 -0.000179 0.000020  
 O 0.000024 -0.000667 -1.267467  
 O -0.000101 -0.000882 1.267468  
 O -2.390709 -1.365709 -0.000036  
 O -2.390572 1.365672 0.000061  
 O 2.388339 1.367054 0.000036  
 O 2.393125 -1.364120 -0.000067

[Mo<sub>2</sub>O<sub>6</sub>] I 3/4

E = -15996.15  
 Mo -1.405826 -0.020153 0.000008  
 Mo 1.409213 0.035813 -0.000026  
 O 0.008624 -0.038699 -1.298717  
 O 0.008697 -0.038881 1.298689  
 O -2.379630 -1.384636 -0.000070  
 O -2.357270 1.358676 0.000100  
 O 2.165887 1.511399 0.000051  
 O 2.535911 -1.490074 0.000046

[Mo<sub>2</sub>O<sub>6</sub>] I 1/2

E = -13945.94  
 Mo -1.481406 -0.010140 -0.017307  
 Mo 1.320206 -0.106121 0.019351  
 O -0.170400 -1.052032 0.909355  
 O -0.139065 1.126857 -0.701747

O -3.528312 0.046479 -0.081230  
 O 2.472850 -1.082943 -0.744500  
 O 2.211224 1.572007 0.607391

[Mo<sub>2</sub>O<sub>3</sub>]-I 3/4

E = -13952.89

Mo -1.533644 -0.000268 0.000000  
 Mo 1.299864 -0.000032 0.000000  
 O -0.040226 -0.000531 1.308465  
 O -0.040226 -0.000525 -1.308465  
 O -3.224182 0.000618 0.000000  
 O 2.267603 -1.408802 -0.000003  
 O 2.264376 1.410813 0.000003

[Mo<sub>2</sub>O<sub>3</sub>]-I 5/6

E = -13952.67

Mo -1.553835 -0.133373 -0.000001  
 Mo 1.297460 0.033551 0.000005  
 O -0.014826 -0.140871 1.322215  
 O -0.014859 -0.140964 -1.322240  
 O -3.139311 0.486240 0.000022  
 O 2.442254 -1.236202 0.000040  
 O 2.072708 1.555861 -0.000057

[Mo<sub>2</sub>O<sub>3</sub>]-I 7/8

E = -13949.43

Mo 1.514076 0.000100 -0.000008  
 Mo -1.313341 0.000199 0.000003  
 O -0.023253 0.001627 1.338634  
 O -0.023522 0.001806 -1.338702  
 O 3.565464 0.000177 -0.000010  
 O -2.290468 1.404675 0.000138  
 O -2.282077 -1.409853 -0.000032

[Mo<sub>2</sub>O<sub>6</sub>]-I 1/2

E = -16002.22

Mo 1.415536 -0.000083 0.000102  
 Mo -1.394983 -0.000031 -0.000090  
 O -0.046627 0.000253 -1.329771  
 O -0.047423 0.000473 1.330185  
 O 2.349784 1.422867 -0.000138  
 O 2.349771 -1.423025 -0.000172  
 O -2.357010 -1.404815 0.000039  
 O -2.356401 1.404848 -0.000204

[Mo<sub>2</sub>O<sub>6</sub>]-I 3/4

E = -15998.70

Mo 1.488918 0.041515 -0.000181  
 Mo -1.522994 -0.014010 0.000121  
 O 0.072655 0.034324 -1.224141  
 O 0.072959 0.038548 1.224066  
 O 2.357801 1.495719 -0.001714  
 O 2.523320 -1.603427 0.002263  
 O -2.359156 -1.506861 -0.000447  
 O -2.488682 1.397290 0.000286

[Mo<sub>2</sub>O<sub>7</sub>]-I 1/2

E = -18039.05

O -2.849866 -1.564737 0.207394  
 O -2.636218 1.467254 0.185232  
 Mo -1.758923 0.064906 -0.131662  
 O -0.163211 -1.033315 0.636029  
 O 2.900366 0.305545 -1.247106  
 O 2.679260 -1.395446 0.163832  
 Mo 1.456188 0.068753 0.118678  
 O -0.058256 0.249024 -1.141798  
 O 1.717284 1.269966 1.264586

[Mo<sub>2</sub>O<sub>7</sub>]-I 3/4

E = -18047.84

O -2.586668 -1.314154 0.275152

O -2.483715 1.378045 -0.449483  
 Mo -1.560082 0.011084 -0.024954  
 O -0.375475 0.322632 1.282649  
 O 2.595335 0.396424 -1.184553  
 O 1.905155 -1.537568 0.598108  
 Mo 1.411052 -0.065032 -0.052945  
 O -0.130661 -0.346266 -1.211315  
 O 1.858431 1.384114 1.098415

[Mo<sub>2</sub>O<sub>7</sub>]-I 5/6

E = -18044.93

O -2.767205 -0.202869 -1.220421  
 O -1.638346 1.643890 0.469316  
 Mo -1.536756 0.047280 -0.066791  
 O -2.278480 -1.145405 1.220020  
 O 2.283434 1.566030 0.327915  
 O 2.993379 -1.127759 -0.369954  
 Mo 1.752794 -0.015008 -0.017969  
 O 0.064946 -0.206110 -1.068255  
 O 0.208075 -0.697210 1.086372

[Mo<sub>2</sub>O<sub>7</sub>]-I 7/8

E = -18042.20

O -3.063686 -1.075195 -0.112347  
 O -2.212691 1.664285 0.096341  
 Mo -1.765461 0.024003 -0.009655  
 O -0.170098 -0.549853 1.070716  
 O 2.367009 1.212803 -1.126181  
 O 2.587127 -1.451353 0.098754  
 Mo 1.503545 -0.172587 0.017271  
 O -0.133353 -0.376927 -1.110566  
 O 2.000752 1.356305 1.043298

[Mo<sub>2</sub>O<sub>7</sub>]-II 1/2

E = -18047.66

O -2.473475 0.803870 1.388414  
 O 2.474027 -0.878990 -1.368101  
 Mo -1.875609 0.034186 0.000511  
 O 2.459647 1.614867 -0.075147  
 O -2.653693 -1.697115 -0.009774  
 Mo 1.921500 -0.009388 0.000422  
 O -2.458582 0.817554 -1.385701  
 O 2.489104 -0.752956 1.435266  
 O -0.077953 -0.037419 0.010148

[Mo<sub>2</sub>O<sub>7</sub>]-II 3/4

E = -18044.63

O -2.558328 -0.680101 -1.458881  
 O 2.416493 -0.825963 1.412704  
 Mo -1.916005 -0.066788 -0.000065  
 O 2.416530 -0.831437 -1.409370  
 O -2.160067 1.895472 -0.000654  
 Mo 1.860185 -0.055958 0.000180  
 O -2.558947 -0.678531 1.459165  
 O 2.677641 1.677854 -0.003485  
 O 0.059731 0.087121 -0.000084

[Mo<sub>2</sub>O<sub>8</sub>]-I 1/2

E = -20093.23

Mo 1.656100 0.009832 -0.026165  
 Mo -1.344173 -0.274381 -0.073738  
 O -1.396780 1.965672 -0.047149  
 O 0.205559 -0.603525 -1.130462  
 O -2.599795 -0.371417 -1.192704  
 O -1.566202 -1.575358 0.974759  
 O 2.488056 1.352713 -0.671558  
 O 2.763153 -1.208303 0.422579  
 O -2.064628 1.380819 0.905964  
 O 0.533022 0.448283 1.263060

[Mo<sub>2</sub>O<sub>8</sub>]-I 3/4

E = -20090.33

Mo 1.793739 0.020275 -0.038384  
 Mo -1.406116 -0.275372 -0.096039  
 O -1.529167 1.938200 -0.033815  
 O 0.151765 -0.416954 -1.085587  
 O -2.661554 -0.521591 -1.197367  
 O -1.447617 -1.566330 1.004135  
 O 2.631192 1.391879 -0.610621  
 O 2.740324 -1.323221 0.416362  
 O -2.265305 1.349499 0.868031  
 O 0.345339 0.487776 1.344586

[Mo<sub>2</sub>O<sub>8</sub>]-II 1/2

E = -20090.78

Mo 1.671030 -0.060891 0.015161  
 Mo -1.670853 0.060492 0.015234  
 O -0.054618 1.054829 -0.446896  
 O -2.489916 -1.545994 -0.612982  
 O 0.054871 -1.051578 -0.449971  
 O 1.849453 -0.135066 1.688550  
 O 2.490253 1.546070 -0.612276  
 O -2.857655 1.053151 -0.707935  
 O 2.858664 -1.053482 -0.706495  
 O -1.851979 0.134167 1.688432

[Mo<sub>2</sub>O<sub>8</sub>]-II 3/4

E = -20090.85

Mo 1.664069 0.067704 -0.000109  
 Mo -1.668383 -0.057475 0.036424  
 O -0.150342 -1.261374 -0.238596  
 O -2.660648 -0.682040 1.247281  
 O 0.130551 0.519353 0.990555  
 O 1.625139 0.807016 -1.517243  
 O 2.383257 -1.693676 -0.100995  
 O -2.453227 -0.308075 -1.458701  
 O 2.967948 0.724878 0.880483  
 O -1.820031 1.840213 0.006562

[Mo<sub>2</sub>O<sub>8</sub>]-III 1/2

E = -20090.74

Mo 1.440593 0.191922 -0.010751  
 Mo -1.574471 -0.128961 0.009233  
 O 0.152981 1.066946 -0.863651  
 O -2.751912 -0.518817 1.173833  
 O -1.984849 -0.962399 -1.397694  
 O 2.229920 1.242960 1.056123  
 O 2.567646 -0.420265 -1.244291  
 O -2.128702 1.694251 -0.050384  
 O 2.589098 -1.575899 0.562464  
 O 0.028675 -0.857322 0.771571

[Mo<sub>2</sub>O<sub>8</sub>]-III 3/4

E = -20090.74

Mo 1.572536 -0.129100 -0.008609  
 Mo -1.441065 0.193639 0.011565  
 O -0.147496 1.069408 0.855630  
 O -2.589403 -1.576456 -0.562447  
 O -2.233903 1.243807 -1.053699  
 O 1.982139 -0.969569 1.394296  
 O 2.149083 1.687565 0.055367  
 O -2.565029 -0.419179 1.246466  
 O 2.746327 -0.517942 -1.178169  
 O -0.031943 -0.856464 -0.772961

[Mo<sub>4</sub>O<sub>13</sub>]<sup>2-</sup>I 1/2

E = -34052.47

Mo 0.548335 2.187139 -0.454668  
 O -2.028936 0.097373 2.088828  
 O 0.798249 3.858655 -0.292065  
 O 0.795269 1.835846 -2.092998  
 O 1.889223 1.469566 0.581981  
 Mo -2.250362 0.485736 0.454110  
 Mo 2.092451 -0.529577 0.541300  
 O 3.495069 -0.508327 -0.416358



O 2.524987 -0.782301 2.161098  
 O -1.301433 2.062572 -0.005226  
 O 0.138732 -0.186853 0.003112  
 O -3.866889 0.982335 0.298696  
 Mo -0.431676 -2.081895 -0.538564  
 O -2.141035 -1.011310 -0.600315  
 O -0.390859 -2.580430 -2.158193  
 O 1.397646 -2.235646 0.007984  
 O -1.093448 -3.323842 0.412019

[Mo<sub>4</sub>O<sub>13</sub>]<sup>2-</sup> I 3/4

E = -34049.95

Mo -0.117967 -1.955884 -0.445680  
 O 2.709972 0.195996 1.992704  
 O 0.087517 -3.390517 0.891641  
 O -0.180818 -2.503213 -2.029101  
 O -1.931462 -1.851462 0.212789  
 Mo 2.688698 -0.069143 0.311534  
 Mo -2.468356 -0.007710 0.382491  
 O -3.817775 0.010324 -0.648741  
 O -3.008213 0.037913 1.990618  
 O 1.830442 -1.645712 -0.058279  
 O -0.419754 -0.004779 -0.188354  
 O 4.297390 -0.141474 -0.250929  
 Mo -0.051402 2.057573 -0.340416  
 O 1.796269 1.293085 -0.527663  
 O -0.161539 2.804655 -1.854967  
 O -1.867908 1.834834 0.157572  
 O 0.398270 3.229961 0.796085

[Mo<sub>4</sub>O<sub>13</sub>]<sup>2-</sup> II 1/2

E = -34052.05

Mo -4.964745 0.329593 -0.228081  
 O -5.358886 1.568268 0.890450  
 O -5.938591 -1.050771 0.070730  
 O -5.231825 0.889728 -1.826649  
 Mo -1.520183 -1.104186 0.229189  
 Mo 1.520230 1.104256 0.229102  
 O 1.534250 1.831261 1.751425  
 O 1.411468 2.339537 -0.914232  
 O 3.050149 0.159477 -0.018013  
 O -0.000092 0.000194 0.079438  
 O -1.412290 -2.338230 -0.915559  
 O -1.532697 -1.832803 1.750753  
 O -3.050492 -0.159336 -0.015245  
 Mo 4.964659 -0.329642 -0.228163  
 O 5.357398 -1.568348 0.890841  
 O 5.233542 -0.889735 -1.826444  
 O 5.938270 1.050649 0.071751

[Mo<sub>4</sub>O<sub>13</sub>]<sup>2-</sup> III 1/2

E = -34051.87

Mo 0.560268 -1.108316 0.006417  
 Mo 4.133464 0.106166 -0.003518  
 Mo -1.564098 1.990786 0.001376  
 Mo -3.337880 -0.910378 -0.004674  
 O -3.163487 1.186907 -0.007520  
 O -1.506671 2.977520 1.377826  
 O 2.229956 -0.359795 0.006021  
 O 5.071456 -1.321510 0.188734  
 O -4.177594 -1.441248 1.380537  
 O -1.662343 -1.444828 0.001976  
 O -0.229988 0.770578 0.001699  
 O 4.538648 0.856414 -1.495613  
 O 4.470454 1.186907 1.289338  
 O -1.497197 2.987060 -1.367831  
 O -4.168349 -1.445793 -1.393699  
 O 0.592004 -2.083625 1.380579  
 O 0.596403 -2.094466 -1.359953

[Mo<sub>4</sub>O<sub>13</sub>]<sup>2-</sup> III 3/4

E = -34049.17

Mo 0.424002 -1.166346 0.013551  
 Mo 4.078826 0.049915 -0.017330

Mo -1.510288 2.011773 -0.003750  
 Mo -3.305321 -0.894526 -0.002915  
 O -3.126723 1.012357 -0.010392  
 O -1.450376 2.994141 1.386023  
 O 2.369594 -0.395090 0.014462  
 O 4.958259 -0.641721 1.282753  
 O -4.162021 -1.393659 1.385486  
 O -1.630926 -1.503376 0.008452  
 O -0.193984 0.787443 0.001357  
 O 4.802330 -0.347565 -1.511140  
 O 4.317197 1.932285 0.250074  
 O -1.437706 2.994607 -1.392810  
 O -4.148178 -1.405444 -1.395475  
 O 0.667635 -2.012460 1.474472  
 O 0.676995 -2.025801 -1.438426

[Mo<sub>4</sub>O<sub>13</sub>]<sup>2-</sup> IV 1/2

E = -34051.87

Mo -3.336056 -0.916169 -0.016794  
 O -3.167534 0.996565 -0.038200  
 O -1.659015 -1.444318 0.024851  
 O -4.196901 -1.436083 1.359625  
 O -4.141261 -1.468553 -1.413978  
 Mo -1.571827 1.990487 0.003871  
 O -1.500066 3.018846 -1.341310  
 O -1.526299 2.944753 1.403412  
 O -0.233587 0.775060 -0.016119  
 Mo 0.562554 -1.101183 0.022311  
 O 0.597828 -2.053920 1.411996  
 O 0.601727 -2.109355 -1.327803  
 O 5.054331 -1.268034 0.461189  
 O 4.601197 0.581073 -1.597619  
 Mo 4.136337 0.105813 -0.012733  
 O 2.229795 -0.347012 0.010343  
 O 4.436989 1.396499 1.081175

[Mo<sub>4</sub>O<sub>13</sub>]<sup>2-</sup> IV 3/4

E = -34047.99

Mo 2.468502 1.852851 -0.185734  
 O 3.137558 0.026943 -0.050297  
 O 0.695857 1.317110 0.366159  
 O 3.174038 2.911680 0.957236  
 O 2.494473 2.426717 -1.794204  
 Mo 2.573574 -1.718305 -0.208275  
 O 2.745616 -2.288085 -1.806050  
 O 3.391595 -2.736826 0.888690  
 O 0.782934 -1.526156 0.243460  
 Mo -0.451822 -0.129870 0.778368  
 O -0.637590 -0.264320 2.440189  
 O -1.925729 -0.093042 -0.340595  
 O -3.903400 0.518658 1.408854  
 O -4.147802 1.068528 -1.744046  
 Mo -3.886786 -0.034436 -0.471090  
 O -4.281962 -1.625819 -0.940475  
 O -5.218790 0.420846 0.826416

[Mo<sub>4</sub>O<sub>13</sub>]<sup>2-</sup> V 1/2

E = -34051.69

Mo -2.513686 -1.205854 -0.553027  
 Mo -1.524366 1.991910 0.168574  
 Mo 0.772332 -0.948988 0.831245  
 O -2.804934 0.627339 -0.317312  
 O -0.731846 -1.476227 -0.426861  
 O 0.020075 1.160339 0.135518  
 O -1.568615 3.272900 -0.957932  
 O -1.881761 2.612703 1.717349  
 O -3.362792 -2.083144 0.627632  
 O -3.082908 -1.701382 -2.075462  
 O 2.363110 0.076220 1.205857  
 O 1.906141 -0.650270 -1.293263  
 Mo 3.215814 0.210633 -0.488257  
 O 3.464042 1.803678 -1.064498  
 O 4.701270 -0.647494 -0.548576  
 O -0.145334 -0.736226 2.229562  
 O 1.385557 -2.508866 0.985680

[Mo<sub>4</sub>O<sub>13</sub>]<sup>2-</sup> V 3/4

E = -34049.27

Mo -2.229732 -1.452858 -0.593294  
 Mo -1.777182 1.848619 0.058799  
 Mo 0.850722 -0.509080 1.185286  
 O -2.702440 0.385605 -0.734022  
 O -0.838563 -1.470551 0.532199  
 O -0.204005 1.209347 0.610402  
 O -1.588479 3.102212 -1.074107  
 O -2.679197 2.446101 1.373744  
 O -3.531074 -2.342033 0.051948  
 O -1.856181 -2.078726 -2.126837  
 O 2.511982 0.625575 1.051296  
 O 1.528648 -0.731188 -0.963271  
 Mo 3.019103 0.238479 -0.691200  
 O 3.132514 1.624777 -1.690250  
 O 4.475606 -0.659269 -0.820979  
 O 0.586609 -0.591730 2.834076  
 O 1.884294 -2.177214 1.167949

[Mo<sub>4</sub>O<sub>13</sub>]<sup>2-</sup> VI 1/2

E = -34051.51

Mo 2.874829 -0.404634 0.065982  
 O 3.937898 -0.645084 -1.229805  
 O 3.754236 -0.651690 1.491220  
 O 2.230202 1.300205 0.027325  
 Mo -0.268904 -2.407236 -0.065920  
 Mo 0.629944 2.451845 -0.057993  
 O 0.694667 3.367788 -1.499076  
 O 0.641707 3.508659 1.284427  
 O -0.753169 1.413230 -0.035002  
 O -0.427816 -3.321866 -1.486413  
 O -1.493113 -1.133960 0.005743  
 O -0.412002 -3.457987 1.258843  
 O 1.480466 -1.618980 -0.035293  
 Mo -3.016246 0.296447 0.054978  
 O -4.249595 -0.897237 0.095374  
 O -3.225157 1.228979 1.477161  
 O -3.331344 1.241722 -1.339007

[Mo<sub>4</sub>O<sub>13</sub>]<sup>2-</sup> VI 3/4

E = -34049.57

Mo -3.029595 -0.030545 0.069637  
 O -4.006738 -0.005457 -1.331070  
 O -3.899513 0.099034 1.533641  
 O -1.767443 -1.531503 0.094245  
 Mo -0.100783 2.373864 -0.085921  
 Mo -0.114806 -2.330861 -0.052116  
 O 0.081233 -2.929139 -1.631625  
 O -0.042355 -3.641639 1.035590  
 O 1.186522 -1.120903 0.343412  
 O -0.191282 3.310587 -1.502910  
 O 1.510144 1.472365 -0.055914  
 O -0.187347 3.416515 1.254861  
 O -1.488167 1.195312 -0.046101  
 Mo 2.855623 0.068544 0.108131  
 O 4.011757 0.763789 -0.945746  
 O 3.499488 0.179931 1.664720  
 O 3.338896 -1.634153 -0.621692

[Mo<sub>4</sub>O<sub>13</sub>]<sup>2-</sup> VII 1/2

E = -34049.60

Mo -2.032391 1.797305 -0.261494  
 O 2.199844 -1.256872 0.228303  
 O -1.956551 -2.497647 -1.617157  
 O -2.726694 2.116944 1.264251  
 O -2.604320 0.218676 -0.890256  
 Mo 3.572823 -0.188387 -0.360739  
 Mo -2.126620 -1.757593 -0.105229  
 O -3.961505 -1.385425 0.309626  
 O -2.217031 -3.034094 1.032032  
 O -2.452104 3.054362 -1.340182  
 O 2.515806 1.300874 -0.190411

O 4.064662 -0.505175 -1.966384  
 Mo 0.937727 0.302701 0.696595  
 O 4.938691 -0.185909 0.668997  
 O -0.173862 1.701292 -0.085544  
 O -0.516748 -0.920690 0.419340  
 O 1.044230 0.585032 2.329435

[Mo<sub>4</sub>O<sub>13</sub>]<sup>2-</sup> VII 3/4  
 E = -34048.66

Mo -0.293022 1.960442 -0.265660  
 O -0.703328 -1.861756 0.332730  
 O 1.094702 0.663559 1.135770  
 O -1.493145 2.758342 -1.156994  
 O 0.719124 3.238795 0.168800  
 Mo -2.072134 -0.535069 0.798009  
 Mo 2.479608 -0.321338 0.625312  
 O 3.750171 0.645172 -0.001085  
 O 3.104229 -1.242141 1.929899  
 O -1.520741 1.202355 1.107306  
 O -1.880068 -0.368179 -1.050959  
 O -1.723058 -1.420721 2.480731  
 Mo -0.047693 -1.134567 -1.340373  
 O -3.748822 -0.740115 0.963702  
 O 0.458879 0.800927 -1.510667  
 O 1.783193 -1.439813 -0.718561  
 O -0.191621 -2.076135 -2.721436

[Mo<sub>4</sub>O<sub>13</sub>]<sup>2-</sup> VIII 1/2  
 E = -34049.22

Mo 3.753904 0.875291 -0.123721  
 Mo 1.301513 -0.980090 0.172026  
 Mo -1.672013 -0.901432 -0.160516  
 Mo -3.844993 0.955599 0.069588  
 O 2.363345 -0.153804 1.332606  
 O 2.456537 0.018977 -1.140967  
 O -2.860578 -0.025083 1.276700  
 O -2.742734 0.443173 -1.306799  
 O -0.085271 -0.482465 -1.130016  
 O -0.261235 -1.128681 1.199000  
 O 1.828517 -2.568372 -0.048546  
 O -2.221784 -2.426189 -0.560491  
 O -5.456465 0.406287 -0.103030  
 O 4.850902 0.082378 1.243622  
 O 3.286465 2.460271 0.256778  
 O -3.840477 2.637528 0.373185  
 O 5.106121 1.001796 -1.168270

[Mo<sub>4</sub>O<sub>13</sub>]<sup>2-</sup> VIII 3/4  
 E = -34049.21

Mo -3.751813 -0.875806 -0.122758  
 Mo -1.301544 0.981743 0.170323  
 Mo 1.670816 0.900676 -0.158953  
 Mo 3.844559 -0.955709 0.069089  
 O -2.373306 0.164419 1.329882  
 O -2.453350 -0.020131 -1.140989  
 O 2.858394 0.020669 1.277825  
 O 2.744010 -0.439347 -1.307483  
 O 0.085777 0.487693 -1.133222  
 O 0.258356 1.118926 1.202376  
 O -1.819805 2.572275 -0.053073  
 O 2.221042 2.427007 -0.551867  
 O 5.456150 -0.405374 -0.099533  
 O -4.858833 -0.090941 1.242128  
 O -3.281858 -2.459739 0.258453  
 O 3.839712 -2.638596 0.367520  
 O -5.101883 -1.004108 -1.169953

[Mo<sub>2</sub>O<sub>5</sub>] I 1/2  
 E = -13950.02

Mo -1.472057 0.230405 0.000014  
 Mo 1.211748 -0.060468 0.000103  
 O -0.154693 0.329096 -1.330291  
 O -0.154759 0.329448 1.330431  
 O -2.586237 -0.995293 -0.000297

O 2.456020 1.071826 -0.000573  
 O 1.806289 -1.627249 0.000111

[Mo<sub>2</sub>O<sub>5</sub>] I 3/4  
 E = -13950.04

Mo -1.547814 0.058950 0.000098  
 Mo 1.318210 -0.014422 -0.000086  
 O -0.080465 0.054261 -1.278437  
 O -0.079886 0.053626 1.278517  
 O -3.189747 -0.214065 -0.000171  
 O 2.348765 1.311433 0.000283  
 O 2.206754 -1.439024 -0.000252

[MoO<sub>3</sub>] I 1/2  
 E = -7997.08

Mo -0.000014 -0.000030 -0.200076  
 O 1.209138 -1.049738 0.350144  
 O 0.304732 1.571934 0.350095  
 O -1.513795 -0.522039 0.350162

[MoO<sub>3</sub>] I 3/4  
 E = -7995.28

Mo -0.021221 0.000089 -0.133236  
 O -0.864834 -1.404503 0.240605  
 O 1.845913 0.002356 0.218118  
 O -0.869670 1.401681 0.240767

[Mo<sub>3</sub>O<sub>10</sub>] I 1/2  
 E = -26048.74

Mo -0.914745 -1.600972 -0.016999  
 O 0.968439 -1.614004 0.398588  
 O -2.146488 0.000736 -0.261436  
 O -1.323628 -2.854354 -1.060113  
 O -1.557554 -1.958090 1.505659  
 Mo 1.907188 -0.000695 0.036237  
 O 2.640898 -0.001027 -1.477801  
 O -0.258585 0.000167 -1.109186  
 Mo -0.913484 1.601653 -0.016998  
 O 0.969708 1.613396 0.398500  
 O -1.556015 1.959013 1.505713  
 O 3.170220 -0.001160 1.148304  
 O -1.321530 2.855400 -1.059983

[Mo<sub>3</sub>O<sub>10</sub>] I 3/4  
 E = -26045.95

Mo -1.727279 -0.774370 -0.016234  
 O -0.079490 -2.022395 -0.183402  
 O -1.742970 1.055360 0.365649  
 O -2.886302 -1.152340 -1.176384  
 O -2.203086 -1.503794 1.433982  
 Mo 1.652777 -0.897668 -0.037623  
 O 2.767533 -1.369046 -1.205995  
 O -0.011963 -0.061417 -1.018323  
 Mo 0.064821 1.750292 -0.072371  
 O 1.823173 0.933818 0.335534  
 O 0.237994 2.303553 1.805705  
 O 2.083310 -1.652692 1.412987  
 O 0.062628 3.058117 -1.107058

[Mo<sub>3</sub>O<sub>10</sub>] II 1/2  
 E = -26048.17

Mo 2.052023 -0.001153 -0.200152  
 O 0.589182 1.373524 -0.144872  
 O 0.587852 -1.374254 -0.140930  
 O 2.759468 -0.003435 -1.708668  
 O 3.152182 0.718482 1.179307  
 Mo -1.186087 1.713126 0.022693  
 O -1.521933 2.502796 1.478520  
 O -1.747722 2.669554 -1.252231  
 O -2.003292 0.001030 -0.005926  
 Mo -1.188087 -1.712002 0.023090  
 O -1.748497 -2.666796 -1.253595

O -1.527443 -2.502452 1.477688  
 O 3.151492 -0.718299 1.181149

[Mo<sub>3</sub>O<sub>10</sub>] II 3/4  
 E = -26045.98

Mo 1.908925 -0.284265 -0.271788  
 O 0.997978 1.395678 -0.085826  
 O 0.475638 -1.453482 -0.061363  
 O 2.541293 -0.388801 -1.808082  
 O 3.184949 0.062696 1.352627  
 Mo -0.809227 1.912320 0.025746  
 O -1.170975 2.411321 1.606679  
 O -1.180034 3.141992 -1.081404  
 O -1.638863 0.340120 -0.399124  
 Mo -1.498506 -1.577885 0.015800  
 O -2.136322 -2.573476 -1.207211  
 O -1.996557 -1.972611 1.594634  
 O 3.016637 -1.226833 1.297844

[Mo<sub>3</sub>O<sub>10</sub>] III 1/2  
 E = -26048.06

Mo 3.237843 -0.648233 -0.008339  
 O 1.488145 0.340618 -0.063158  
 O -3.482111 -1.338730 -1.524275  
 O 3.180505 -1.897472 -1.177474  
 O 3.441956 -1.315116 1.554645  
 Mo 0.006304 1.344876 0.012793  
 O -0.010480 2.281557 1.411362  
 O -0.073461 2.392417 -1.302652  
 O -1.558075 0.214306 0.005999  
 Mo -3.194248 -0.618816 -0.027643  
 O -4.438739 0.666419 0.315439  
 O -3.322328 -1.991115 1.261416  
 O 4.512618 0.438527 -0.359563

[Mo<sub>3</sub>O<sub>10</sub>] III 3/4  
 E = -26045.52

Mo -2.766632 -0.813238 0.000022  
 O -1.435276 0.420100 0.000107  
 O 2.735146 -1.771528 1.399079  
 O -2.736219 -1.770723 1.399672  
 O -2.735292 -1.771639 -1.398990  
 Mo 0.000022 1.766528 -0.000008  
 O -0.000083 2.691343 -1.422379  
 O 0.000255 2.690775 1.422718  
 O 1.435181 0.419987 -0.000386  
 Mo 2.766603 -0.813290 -0.000019  
 O 4.461056 0.063869 0.000690  
 O 2.736423 -1.770927 -1.399577  
 O -4.461157 0.063749 -0.000908

[Mo<sub>3</sub>O<sub>10</sub>] IV 1/2  
 E = -26047.34

Mo 1.901973 -0.962442 0.025924  
 O 1.311155 0.726551 0.301238  
 O 3.037695 -1.003383 -1.222062  
 O 2.600516 -1.604890 1.422249  
 Mo 0.004039 2.212635 -0.000053  
 O -0.282495 3.130400 1.398496  
 O 0.293487 3.130486 -1.397972  
 O -1.307475 0.730567 -0.301600  
 Mo -1.905489 -0.955817 -0.025992  
 O -2.606506 -1.595942 -1.422160  
 O -3.041459 -0.991722 1.221925  
 O -0.405233 -2.033206 0.597663  
 O 0.397568 -2.034338 -0.597141

[Mo<sub>3</sub>O<sub>10</sub>] IV 3/4  
 E = -26044.87

Mo 2.307896 -0.808357 0.031902  
 O 1.230287 0.650838 0.751333  
 O 2.903593 -0.511724 -1.528100  
 O 3.453771 -1.360289 1.155339

Mo 0.005491 1.818136 -0.000107  
 O -0.683364 2.791819 1.199820  
 O 0.691269 2.791614 -1.202097  
 O -1.215041 0.644464 -0.747774  
 Mo -2.312011 -0.802899 -0.034555  
 O -3.426271 -1.378136 -1.177783  
 O -2.951258 -0.474840 1.501791  
 O -0.642889 -2.116682 0.144040  
 O 0.632679 -2.123183 -0.082080

[Mo<sub>2</sub>O<sub>7</sub>] I 1/2  
 E = -18043.17

O -2.669010 -1.124350 -0.480787  
 O -2.223596 1.490348 0.049079  
 Mo -1.497762 -0.006780 -0.084398  
 O -0.499411 -0.518666 1.505928  
 O 2.666688 1.128272 -0.476530  
 O 2.227328 -1.488962 0.044451  
 Mo 1.497855 0.006801 -0.084348  
 O 0.000140 0.000821 -1.263259  
 O 0.497374 0.512426 1.507031

[Mo<sub>2</sub>O<sub>7</sub>] II 1/2  
 E = -18042.11

O -2.456228 0.135405 -1.588796  
 O 2.456238 0.139573 1.588390  
 Mo -1.872707 -0.010343 -0.023138  
 O 2.354590 -1.487545 -0.605689  
 O -2.703468 1.331184 0.996598  
 Mo 1.872642 -0.010289 0.023137  
 O -2.354403 -1.486022 0.609537  
 O 2.703629 1.328549 -0.999897  
 O -0.000015 0.147178 -0.000135

[Mo<sub>2</sub>O<sub>7</sub>] II 3/4  
 E = -18042.11

O -2.456501 0.136994 -1.588455  
 O 2.456502 0.137026 1.588452  
 Mo -1.872634 -0.010344 -0.023082  
 O 2.353858 -1.486877 -0.607822  
 O -2.703494 1.330144 0.998034  
 Mo 1.872634 -0.010343 0.023083  
 O -2.353857 -1.486866 0.607850  
 O 2.703491 1.330123 -0.998066  
 O -0.000000 0.148058 0.000001

[Mo<sub>2</sub>O<sub>7</sub>] III 1/2  
 E = -18041.56

O -2.511225 1.370360 0.083325  
 O -0.004150 -0.000267 1.268111  
 Mo -1.548249 0.000002 0.045581  
 O 2.835543 0.000493 0.946782  
 O -2.508770 -1.372072 0.081869  
 Mo 1.400242 0.000149 0.074749  
 O 1.626016 -1.568844 -0.863903  
 O 1.624218 1.568639 -0.864580  
 O -0.284599 0.000901 -1.283336

[Mo<sub>2</sub>O<sub>7</sub>] III 3/4  
 E = -18041.61

O -2.508512 1.368437 0.100947  
 O 0.002763 -0.000467 1.262577  
 Mo -1.543940 -0.000060 0.050474  
 O 2.855435 0.003046 0.944545  
 O -2.503224 -1.372241 0.099759  
 Mo 1.416369 0.000501 0.076182  
 O 1.569744 -1.550798 -0.879543  
 O 1.561462 1.549359 -0.882468  
 O -0.307921 0.000345 -1.310757

[Mo<sub>3</sub>O<sub>10</sub>]<sup>2-</sup> I 1/2  
 E = -26051.01

Mo 3.395824 -0.532156 0.000214  
 O 1.513076 0.020822 0.006220  
 O -3.673299 -1.624529 -1.297496  
 O 3.762258 -1.308406 -1.488570  
 O 3.674008 -1.625208 1.296871  
 Mo 0.000130 1.063730 0.000029  
 O -0.004802 2.068670 1.364597  
 O 0.005719 2.067638 -1.365290  
 O -1.513541 0.021894 -0.005291  
 Mo -3.395987 -0.532046 -0.000179  
 O -4.406758 0.845291 -0.187910  
 O -3.762419 -1.309289 1.488092  
 O 4.405933 0.845595 0.188442

[Mo<sub>3</sub>O<sub>10</sub>]<sup>2-</sup> I 3/4  
 E = -26047.84

Mo 3.388404 -0.523353 -0.000022  
 O 1.527669 0.064720 0.000058  
 O -4.011890 -1.307750 -1.436127  
 O 3.689803 -1.471997 -1.402822  
 O 3.690086 -1.471531 1.403029  
 Mo -0.047496 1.028795 0.000025  
 O -0.101416 2.023478 1.372476  
 O -0.101314 2.023586 -1.372348  
 O -1.460926 -0.151488 -0.000090  
 Mo -3.377627 -0.621348 -0.000015  
 O -3.462683 1.365154 -0.000081  
 O -4.011241 -1.307798 1.436317  
 O 4.434691 0.842130 -0.000347

[Mo<sub>3</sub>O<sub>10</sub>]<sup>2-</sup> II 1/2  
 E = -26050.16

Mo -1.708699 -0.630766 -0.014416  
 O -0.340524 -1.983693 0.276352  
 O -1.547922 1.286755 0.276291  
 O -2.756083 -1.018309 -1.299809  
 O -2.569239 -0.947960 1.431335  
 Mo 1.400618 -1.164485 -0.014457  
 O 2.259595 -1.878894 -1.299493  
 O 0.000123 0.000195 -0.995898  
 Mo 0.308009 1.795200 -0.014589  
 O 1.888341 0.697155 0.275807  
 O 0.463508 2.698334 1.431549  
 O 2.105897 -1.749615 1.431713  
 O 0.496680 2.896299 -1.299677

[Mo<sub>3</sub>O<sub>10</sub>]<sup>2-</sup> II 3/4  
 E = -26047.67

Mo -1.621892 -0.866191 -0.014533  
 O -0.000050 -1.870619 0.329068  
 O -1.785764 0.999286 0.333181  
 O -2.483127 -1.377031 -1.391101  
 O -2.516262 -1.459607 1.316500  
 Mo 1.621837 -0.866280 -0.014556  
 O 2.483026 -1.377153 -1.391140  
 O -0.000008 0.109649 -1.088024  
 Mo 0.000042 1.759474 -0.084345  
 O 1.785809 0.999194 0.333170  
 O 0.000213 2.138510 1.882515  
 O 2.516200 -1.459747 1.316458  
 O 0.000037 3.155749 -1.045100

[Mo<sub>3</sub>O<sub>10</sub>]<sup>2-</sup> III 1/2  
 E = -26050.16

Mo 1.761235 -0.463985 0.014433  
 O 1.417886 1.429271 -0.275578  
 O 0.529038 -1.942085 -0.275230  
 O 2.646905 -0.698191 -1.432023  
 O 2.841707 -0.749404 1.299100  
 Mo -0.478414 1.757152 0.014544  
 O -0.771707 2.836181 1.298623  
 O -0.720411 2.639672 -1.432542  
 O -1.947046 0.513158 -0.273679  
 Mo -1.282684 -1.293017 0.014546

O -1.927646 -1.942304 -1.432319  
 O -2.069832 -2.087260 1.298648  
 O 0.000390 0.000178 0.996504

[Mo<sub>3</sub>O<sub>10</sub>]<sup>2-</sup> III 3/4  
 E = -26047.46

Mo 2.143812 0.331899 -0.024720  
 O 0.483635 1.376240 -0.445638  
 O 1.179568 -1.399602 0.068381  
 O 3.219032 0.362708 -1.362101  
 O 2.865262 0.741696 1.474606  
 Mo -1.321425 1.373016 -0.025497  
 O -1.738470 2.436041 1.239658  
 O -2.050140 2.045792 -1.416874  
 O -2.191058 -0.347596 -0.044993  
 Mo -0.669317 -1.685720 0.016706  
 O -0.874465 -2.028644 -1.647431  
 O -1.076473 -3.097993 0.879210  
 O -0.620508 -0.189414 1.431112

[Mo<sub>3</sub>O<sub>10</sub>]<sup>2-</sup> IV 1/2  
 E = -26046.61

Mo 1.591213 -0.787720 -0.040468  
 O 1.757880 1.090271 -0.040228  
 O 2.133470 -1.231698 -1.597424  
 O 2.750908 -1.285503 1.125757  
 Mo -0.014387 1.827045 0.023398  
 O -0.021292 2.619877 1.543158  
 O -0.020747 2.880462 -1.329100  
 O -1.775010 1.063216 -0.041956  
 Mo -1.578676 -0.811854 -0.040737  
 O -2.113792 -1.265307 -1.597466  
 O -2.730678 -1.325958 1.126099  
 O 0.012349 -1.617717 1.240125  
 O 0.016623 -2.121866 -0.125482

[Mo<sub>3</sub>O<sub>10</sub>]<sup>2-</sup> IV 3/4  
 E = -26048.07

Mo 2.072367 0.333788 0.066194  
 O 0.434985 1.237147 0.044534  
 O 3.093802 1.501185 -0.697550  
 O 2.648583 0.195475 1.655905  
 Mo -1.460064 1.640076 -0.025826  
 O -2.020880 2.456059 1.374422  
 O -1.937751 2.363735 -1.505029  
 O -1.867675 -0.297317 0.018578  
 Mo -0.898787 -1.877368 0.004649  
 O -1.232000 -2.741985 -1.437800  
 O -1.355448 -2.851906 1.339532  
 O 0.836550 -1.453703 0.104132  
 O 2.903875 -0.915296 -1.133059

[Mo<sub>3</sub>O<sub>10</sub>]<sup>2-</sup> V 1/2  
 E = -26047.11

Mo 2.091424 0.000254 -0.207764  
 O 0.542238 1.271766 -0.141522  
 O 0.542735 -1.272472 -0.142798  
 O 2.743495 0.000753 -1.763221  
 O 3.215005 -0.720143 1.205868  
 Mo -1.202736 1.688543 0.025647  
 O -1.520624 2.459362 1.525051  
 O -1.726836 2.648894 -1.295972  
 O -2.118886 -0.000275 -0.001712  
 Mo -1.202183 -1.688739 0.025587  
 O -1.727045 -2.649682 -1.295286  
 O -1.519007 -2.459186 1.525389  
 O 3.214775 0.720680 1.205986

[Mo<sub>3</sub>O<sub>10</sub>]<sup>2-</sup> V 3/4  
 E = -26046.86

Mo 1.972963 -0.369997 -0.212652  
 O 0.918368 1.344340 -0.290759  
 O 0.364580 -1.414880 0.050496

O 2.616320 -0.707940 -1.735022  
 O 2.980371 -1.168479 1.233378  
 Mo -0.772337 1.941575 0.025685  
 O -0.839917 2.907085 1.439490  
 O -1.341460 2.856207 -1.307867  
 O -1.760554 0.424426 0.247063  
 Mo -1.567661 -1.556045 0.052214  
 O -2.169069 -2.123798 -1.454163  
 O -2.101545 -2.442461 1.426236  
 O 3.259842 0.243953 1.098606

[Mo<sub>3</sub>O<sub>9</sub>] I 1/2

E = -24000.12

Mo -1.113825 -1.689854 0.000004  
 O -1.714792 0.101605 -0.001069  
 O 0.769473 -1.535979 0.001294  
 O -1.658933 -2.514967 1.342475  
 O -1.657058 -2.515962 -1.342617  
 Mo -0.906518 1.809498 -0.000106  
 O -1.349760 2.694426 -1.342047  
 O -1.349654 2.692609 1.343060  
 O 0.945533 1.434478 -0.000307  
 Mo 2.020342 -0.119654 0.000077  
 O 3.008210 -0.177510 1.342192  
 O 3.006991 -0.178649 -1.342847

[Mo<sub>3</sub>O<sub>9</sub>] I 3/4

E = -23997.01

Mo 1.041147 1.720791 -0.010858  
 O 1.829097 0.003095 0.006433  
 O -0.806002 1.368063 -0.092887  
 O 1.430083 2.582643 1.367524  
 O 1.531786 2.612318 -1.337113  
 Mo 1.047196 -1.717430 -0.010444  
 O 1.537703 -2.605550 -1.339079  
 O 1.442775 -2.579641 1.365836  
 O -0.801301 -1.370952 -0.087576  
 Mo -2.109226 -0.003436 0.033398  
 O -2.804774 -0.002394 1.537697  
 O -3.249733 -0.007188 -1.484337

[Mo<sub>3</sub>O<sub>9</sub>] II 1/2

E = -23998.91

Mo 0.000005 -0.717407 -0.000210  
 Mo -2.683236 0.367487 0.000124  
 O -1.352141 -0.151558 1.240934  
 O -1.353719 -0.153591 -1.241072  
 O 0.000269 -2.367843 0.000345  
 O -3.079803 1.992396 -0.001336  
 O -4.081418 -0.549596 0.001399  
 O 1.352633 -0.152100 -1.241112  
 O 1.353115 -0.152311 1.240993  
 Mo 2.683168 0.367607 0.000010  
 O 4.080651 -0.550572 -0.000159  
 O 3.080744 1.992318 0.000407

[Mo<sub>3</sub>O<sub>9</sub>] II 3/4

E = -23996.66

Mo -0.039353 -0.744872 0.000047  
 Mo -2.660449 0.377842 -0.000036  
 O -1.348306 -0.097259 1.276111  
 O -1.348850 -0.098436 -1.276203  
 O -0.027885 -2.387662 0.000443  
 O -3.088843 2.001092 -0.000658  
 O -4.041931 -0.573941 0.000636  
 O 1.480604 -0.041200 -1.303902  
 O 1.480954 -0.041625 1.303823  
 Mo 2.629998 0.330255 -0.000107  
 O 3.988480 -0.655144 -0.000617  
 O 3.272248 2.087246 0.000871

[Mo<sub>2</sub>O<sub>7</sub>]<sup>2-</sup> I 1/2

E = -18049.32

Mo -1.903884 0.000003 -0.000008  
 Mo 1.903885 0.000007 0.000018  
 O -0.000001 0.000111 0.000053  
 O 2.494708 -1.324121 0.941347  
 O 2.495081 -0.153305 -1.617264  
 O -2.495213 0.152965 1.617259  
 O -2.494770 1.324228 -0.941155  
 O 2.495184 1.477153 0.675984  
 O -2.494991 -1.477084 -0.676272

[Mo<sub>2</sub>O<sub>7</sub>]<sup>2-</sup> I 3/4

E = -18045.95

Mo 1.952371 -0.053781 -0.002603  
 Mo -1.883212 -0.039147 -0.002319  
 O 0.014182 -0.000534 -0.001959  
 O -2.507513 0.682703 1.441148  
 O -2.508079 0.803580 -1.378515  
 O 2.709999 -0.529047 -1.478443  
 O 1.631418 1.904667 0.098547  
 O -2.407001 -1.689654 -0.072184  
 O 2.703908 -0.683840 1.417249

[Mo<sub>2</sub>O<sub>7</sub>]<sup>2-</sup> I 5/6

E = -18042.89

Mo -1.893703 0.190368 0.021237  
 Mo 1.923888 -0.016657 0.022001  
 O 0.036148 -0.054269 -0.013578  
 O 2.538394 -1.571898 0.474496  
 O 2.540968 0.410100 -1.541286  
 O -2.487003 1.754266 -0.342662  
 O -2.103369 -1.631262 -0.941960  
 O 2.460357 1.161941 1.175802  
 O -3.143966 -0.980865 0.962186

[Mo<sub>2</sub>O<sub>7</sub>]<sup>2-</sup> I 7/8

E = -18039.50

Mo -1.857915 0.151102 0.037120  
 Mo 1.973188 -0.055161 0.044782  
 O 0.058922 -0.208369 0.038466  
 O 2.707935 0.150490 1.599085  
 O 2.833771 -1.120327 -1.014446  
 O -2.441795 1.719116 -0.330343  
 O -2.090745 -1.684894 -0.910347  
 O 1.431902 1.650416 -0.812641  
 O -3.105172 -1.010124 1.000242

[MoO<sub>3</sub>] I 1/2

E = -8000.05

Mo 0.000043 -0.000034 -0.089409  
 O 0.055667 -1.716803 0.156484  
 O 1.459291 0.906752 0.156476  
 O -1.515185 0.810228 0.156439

[MoO<sub>3</sub>] I 3/4

E = -7997.15

Mo 0.060233 0.000079 0.000011  
 O 0.826655 1.557831 -0.000021  
 O -1.977425 -0.004488 -0.000016  
 O 0.834549 -1.553758 -0.000021

[Mo<sub>2</sub>O<sub>6</sub>]<sup>2-</sup> I 1/2

E = -16000.16

Mo -1.320098 -0.000034 0.000005  
 Mo 1.320138 -0.000009 -0.000006  
 O -0.000015 -0.000100 -1.444001  
 O 0.000010 -0.000042 1.444000  
 O -2.232915 -1.481317 0.000010  
 O -2.233051 1.481169 -0.000018  
 O 2.232391 1.481602 -0.000008  
 O 2.233370 -1.481086 0.000019

[Mo<sub>2</sub>O<sub>6</sub>]<sup>2-</sup> I 3/4

E = -15999.71

Mo -1.526597 -0.000072 -0.000004  
 Mo 1.526595 -0.000061 0.000004  
 O 0.000010 -0.000496 -1.224561  
 O -0.000018 -0.001195 1.224560  
 O -2.452483 -1.470747 -0.000139  
 O -2.451195 1.471415 0.000146  
 O 2.450297 1.471930 0.000146  
 O 2.453400 -1.470211 -0.000151

**Table S6:** Energies of calculated structures on the M06/def2TZVP level of theory. See Figures for the respective structures.

| Ion                                              | Isomer | Singlet/Douplet | Triplet/Quartet | Pentet/Hextet |
|--------------------------------------------------|--------|-----------------|-----------------|---------------|
| [MoO <sub>4</sub> ] <sup>-</sup>                 | I      | 0.00            | 3.13            | -             |
|                                                  | II     | 3.39            | 3.93            | -             |
| [Mo <sub>2</sub> O <sub>8</sub> ] <sup>2-</sup>  | I      | 0.00            | 2.01            | -             |
|                                                  | II     | 1.94            | 1.47            | -             |
|                                                  | III    | 1.94            | 1.95            | -             |
| [Mo <sub>3</sub> O <sub>9</sub> ] <sup>-</sup>   | I      | 0.00            | 3.08            | -             |
|                                                  | II     | 0.28            | 3.36            | -             |
| [Mo <sub>2</sub> O <sub>6</sub> ]                | I      | 0.00            | 2.59            | -             |
| [Mo <sub>2</sub> O <sub>5</sub> ] <sup>-</sup>   | I      | 0.09            | 0.00            | 3.08          |
| [Mo <sub>2</sub> O <sub>6</sub> ] <sup>-</sup>   | I      | 0.00            | 3.15            | 6.47          |
| [Mo <sub>2</sub> O <sub>7</sub> ] <sup>-</sup>   | I      | 0.00            | 2.76            | 5.34          |
| [Mo <sub>2</sub> O <sub>8</sub> ] <sup>-</sup>   | I      | 0.00            | -               | -             |
|                                                  | II     | 1.06            | 2.45            | -             |
|                                                  | III    | 2.30            | 2.29            | -             |
|                                                  | IV     | 2.41            | 2.41            | -             |
| [Mo <sub>4</sub> O <sub>13</sub> ] <sup>2-</sup> | I      | 0.00            | 2.58            | -             |
|                                                  | II     | 0.06            | 3.40            | -             |
|                                                  | III    | 0.41            | 2.99            | -             |
|                                                  | IV     | 0.49            | 3.15            | -             |
|                                                  | V      | 2.74            | 2.69            | -             |
|                                                  | VI     | 3.21            | 3.21            | -             |
| [Mo <sub>2</sub> O <sub>5</sub> ]                | I      | 0.17            | 0.00            | -             |
| [MoO <sub>3</sub> ]                              | I      | 0.00            | 1.59            | -             |
| [Mo <sub>3</sub> O <sub>10</sub> ] <sup>-</sup>  | I      | 0.00            | 2.71            | -             |
|                                                  | II     | 0.07            | 2.72            | -             |
|                                                  | III    | 0.42            | 2.49            | -             |
|                                                  | IV     | 1.24            | 3.52            | -             |
| [Mo <sub>2</sub> O <sub>7</sub> ]                | I      | 0.00            | 0.00            | -             |
| [Mo <sub>3</sub> O <sub>10</sub> ] <sup>2-</sup> | I      | 0.00            | 3.14            | -             |
|                                                  | II     | 1.26            | 3.68            | -             |
|                                                  | III    | 4.99            | 3.04            | -             |
|                                                  | IV     | 4.13            | 4.26            | -             |
| [Mo <sub>3</sub> O <sub>9</sub> ]                | I      | 0.00            | 2.96            | -             |
|                                                  | II     | 1.27            | 3.43            | -             |

|                                |  |      |      |      |
|--------------------------------|--|------|------|------|
| $[\text{Mo}_2\text{O}_7]^{2-}$ |  | 0.00 | 3.33 | 6.31 |
| $[\text{MoO}_3]$               |  | 0.00 | 2.92 | -    |
| $[\text{Mo}_2\text{O}_6]^{2-}$ |  | 0.00 | 0.31 | -    |

Calculated structures on the B3LYP/def2TZVP level of theory

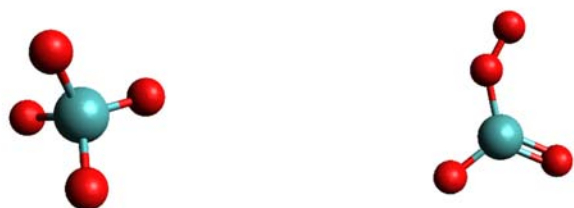

I E=0.00

II E=3.39

Figure S5.1: Calculated Molecules of  $[\text{MoO}_4]^-$  in lowest multiplicity unless marked with \*.

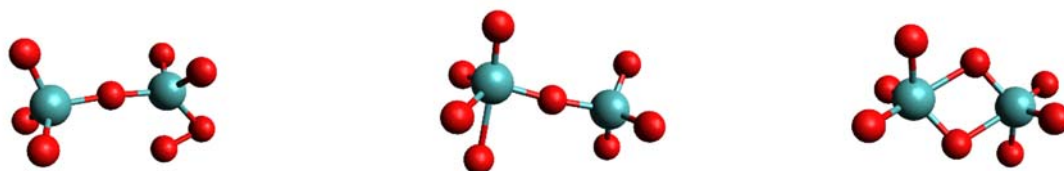

I E=0.00

II\* E=1.47

III E=1.94

Figure S5.2: Calculated Molecules of  $[\text{Mo}_2\text{O}_8]^{2-}$  in lowest multiplicity unless marked with \*.

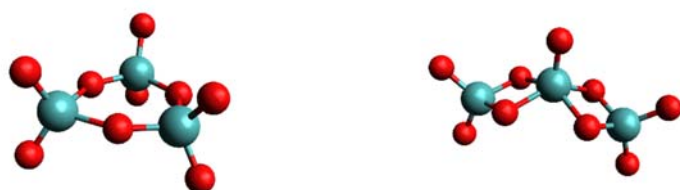

I E=0.00

II E=0.28

Figure S5.3: Calculated Molecules of  $[\text{Mo}_3\text{O}_9]^-$  in lowest multiplicity unless marked with \*.

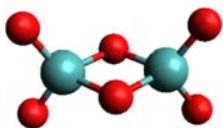

1 E=0.00

Figure S5.4: Calculated Molecules of  $[\text{Mo}_2\text{O}_6]$  in lowest multiplicity unless marked with \*.

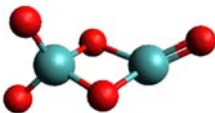

1\* E=0.00

Figure S5.5: Calculated Molecules of  $[\text{Mo}_2\text{O}_5]^-$  in lowest multiplicity unless marked with \*.

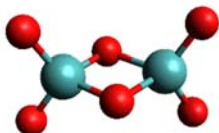

1 E=0.00

Figure S5.6: Calculated Molecules of  $[\text{Mo}_2\text{O}_6]^-$  in lowest multiplicity unless marked with \*.

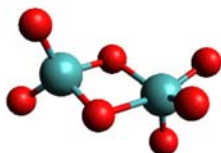

1 E=0.00

Figure S5.7: Calculated Molecules of  $[\text{Mo}_2\text{O}_7]^-$  in lowest multiplicity unless marked with \*.



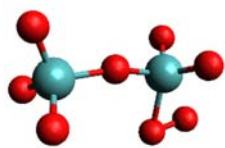

I E=0.00

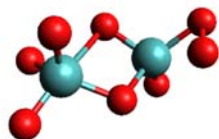

II E=1.06

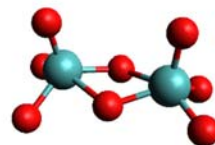

III\* E=2.29

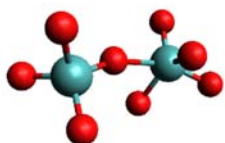

IV\* E=2.41

Figure S5.8: Calculated Molecules of  $[\text{Mo}_2\text{O}_8]^{2-}$  in lowest multiplicity unless marked with \*.

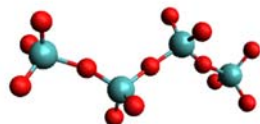

I E=0.00

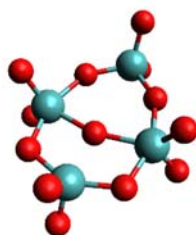

II E=0.06

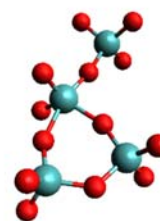

III E=0.41

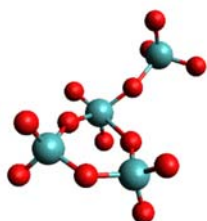

IV E=0.49

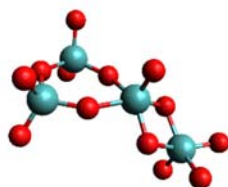

V\* E=2.69

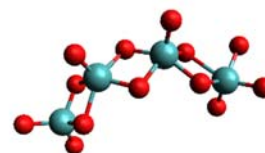

VI E=3.21

Figure S5.9: Calculated Molecules of  $[\text{Mo}_4\text{O}_{13}]^{2-}$  in lowest multiplicity unless marked with \*.

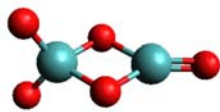

I\* E=0.00

Figure S5.10: Calculated Molecules of  $[\text{Mo}_2\text{O}_5]$  in lowest multiplicity unless marked with \*.

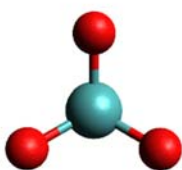

I E=0.00

Figure S5.11: Calculated Molecules of  $[\text{MoO}_3]$  in lowest multiplicity unless marked with \*.

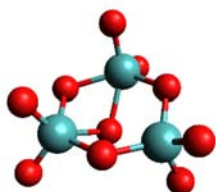

I E=0.00

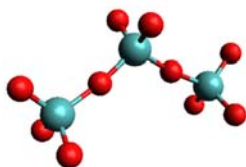

II E=0.07

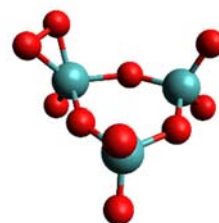

III E=0.42

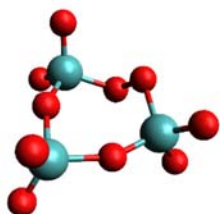

IV E=1.24

Figure S5.12: Calculated Molecules of  $[\text{Mo}_3\text{O}_{10}]^-$  in lowest multiplicity unless marked with \*.

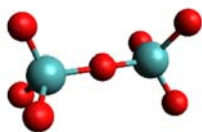

I E=0.00

Figure S5.13: Calculated Molecules of  $[\text{Mo}_2\text{O}_7]$  in lowest multiplicity unless marked with \*.

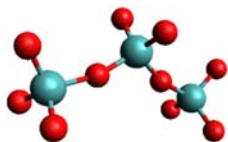

I E=0.00

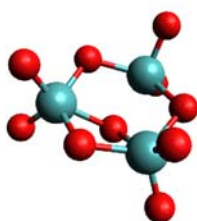

II E=1.26

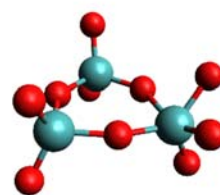

III\* E=3.04

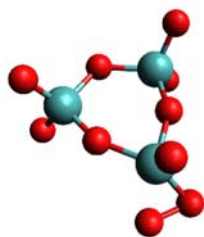

IV E=4.13

Figure S5.14: Calculated Molecules of  $[\text{Mo}_3\text{O}_{10}]^{2-}$  in lowest multiplicity unless marked with \*.

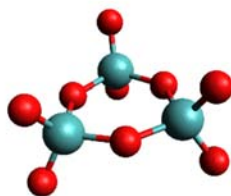

I E=0.00

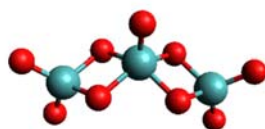

II E=1.27

Figure S5.15: Calculated Molecules of  $[\text{Mo}_3\text{O}_9]$  in lowest multiplicity unless marked with \*.

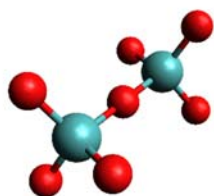

| E=0.00

Figure S5.16: Calculated Molecules of  $[\text{Mo}_2\text{O}_7]^{2-}$  in lowest multiplicity unless marked with \*.

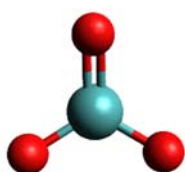

| E=0.00

Figure S5.17: Calculated Molecules of  $[\text{MoO}_3]^-$  in lowest multiplicity unless marked with \*.

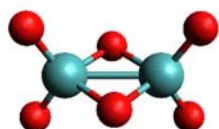

| E=0.00

Figure S5.18: Calculated Molecules of  $[\text{Mo}_2\text{O}_6]^{2-}$  in lowest multiplicity unless marked with \*.



Mo -1.599492 0.008290 0.001116  
 Mo 1.316033 -0.023243 0.002923  
 O 0.004471 1.078742 0.741178  
 O -0.025374 -1.065917 -0.770321  
 O -3.664216 0.009003 -0.000665  
 O 2.547572 -1.056039 0.751539  
 O 2.625707 1.112712 -0.742932

[Mo<sub>2</sub>O<sub>3</sub>]-I 3/4  
 E = -13961.01  
 Mo 1.506724 -0.097453 0.035629  
 Mo -1.329636 0.030114 -0.008135  
 O 0.209381 -0.540779 -1.225938  
 O 0.202791 0.340543 1.295167  
 O 3.154478 0.361491 -0.137242  
 O -2.361555 -1.302883 0.329075  
 O -2.134808 1.495157 -0.405408

[Mo<sub>2</sub>O<sub>3</sub>]-I 5/6  
 E = -13961.10  
 Mo -1.576361 -0.168250 0.000000  
 Mo 1.302046 0.039209 0.000000  
 O -0.000283 -0.154932 1.320971  
 O -0.000291 -0.154959 -1.320967  
 O -3.099595 0.615481 0.000000  
 O 2.483308 -1.214503 0.000009  
 O 2.057014 1.586378 -0.000015

[Mo<sub>2</sub>O<sub>3</sub>]-I 7/8  
 E = -13958.01  
 Mo 1.543353 -0.000858 0.000003  
 Mo -1.332205 0.000379 -0.000001  
 O -0.039207 0.001877 1.330533  
 O -0.039218 0.001852 -1.330539  
 O 3.600258 0.002960 -0.000010  
 O -2.318910 1.414640 -0.000009  
 O -2.311448 -1.418815 0.000014

[Mo<sub>2</sub>O<sub>6</sub>]-I 1/2  
 E = -16002.18  
 Mo -1.619785 -0.024493 -0.145261  
 Mo 1.650232 -0.012430 -0.069327  
 O 0.033223 -0.605271 -1.102253  
 O -0.008842 -0.412622 1.079664  
 O -2.727679 -0.956032 1.223714  
 O -2.459645 1.321126 -0.773186  
 O 1.849347 1.619493 1.039343  
 O 3.153748 -0.772853 -0.340692

[Mo<sub>2</sub>O<sub>6</sub>]-I 3/4  
 E = -16011.49  
 Mo 1.407107 -0.000065 -0.000066  
 Mo -1.437733 -0.000049 0.000264  
 O 0.068613 -0.000947 1.326711  
 O 0.067022 -0.000016 -1.326175  
 O 2.381190 -1.412280 -0.000935  
 O 2.379479 1.413295 0.000220  
 O -2.367249 1.441727 -0.000567  
 O -2.368265 -1.441182 -0.000293

[Mo<sub>2</sub>O<sub>6</sub>]-I 5/6  
 E = -16008.34  
 Mo 1.423978 -0.005283 -0.013685  
 Mo -1.446678 -0.076787 0.080261  
 O 0.138666 -0.507038 1.253058  
 O 0.089444 0.667138 -1.107510  
 O 2.270510 -1.327715 -0.711221  
 O 2.531172 1.177420 0.561113  
 O -2.275569 1.699092 -0.214856  
 O -2.635044 -1.278032 -0.130109

[Mo<sub>2</sub>O<sub>6</sub>]-I 7/8  
 E = -16005.02  
 Mo -1.492657 -0.047773 -0.028688  
 Mo 1.523186 -0.057136 0.095294  
 O -0.057745 0.445136 -1.122285  
 O -0.101144 -0.497137 1.172142  
 O -2.379233 -1.412635 -0.570278  
 O -2.539770 1.481525 0.557863  
 O 2.177658 1.783978 -0.333661  
 O 2.739955 -1.250092 -0.053464

[Mo<sub>2</sub>O<sub>7</sub>]-I 1/2  
 E = -18049.62  
 O -2.797090 -1.633017 0.333135  
 O -2.824804 1.382170 0.109184  
 Mo -1.814799 0.032882 -0.130282  
 O -0.154262 -0.797586 0.756532  
 O 2.821586 -0.208291 -1.311261  
 O 2.737277 -1.345203 0.361995  
 Mo 1.505562 0.120636 0.101706  
 O -0.079347 0.302670 -1.106219  
 O 1.920132 1.493287 1.006661

[Mo<sub>2</sub>O<sub>7</sub>]-I 3/4  
 E = -18058.10  
 O -2.611024 -1.332505 0.214312  
 O -2.495757 1.410827 -0.393463  
 Mo -1.572446 0.012115 -0.024052  
 O -0.375506 0.259456 1.301154  
 O 2.610705 0.454164 -1.180407  
 O 1.928265 -1.569528 0.548920  
 Mo 1.421323 -0.064078 -0.051846  
 O -0.133538 -0.296310 -1.222620  
 O 1.870252 1.346704 1.130571

[Mo<sub>2</sub>O<sub>7</sub>]-I 5/6  
 E = -18055.34  
 O -2.710255 -0.548518 -1.198507  
 O -1.815074 1.708195 0.168128  
 Mo -1.559874 0.042049 -0.051567  
 O -2.380958 -0.904946 1.366025  
 O 2.425598 1.563829 0.220391  
 O 2.971527 -1.253564 -0.206304  
 Mo 1.796023 -0.016975 -0.011754  
 O 0.097610 -0.203429 -1.069392  
 O 0.171771 -0.493205 1.052092

[Mo<sub>2</sub>O<sub>7</sub>]-I 7/8  
 E = -18052.76  
 O -2.932789 -1.353341 0.000710  
 O -2.530320 1.520596 -0.001336  
 Mo -1.821321 -0.044204 -0.000216  
 O -0.144661 -0.279251 1.081314  
 O 2.747041 -0.947380 -1.011984  
 O 2.745395 -0.951043 1.009687  
 Mo 1.498613 0.142782 0.000360  
 O -0.143856 -0.281013 -1.080558  
 O 1.953407 1.773897 0.001409

[Mo<sub>2</sub>O<sub>8</sub>]-I 1/2  
 E = -20104.52  
 Mo 2.043094 0.023632 0.000002  
 Mo -1.733963 -0.251843 -0.000005  
 O -1.806173 1.854152 -0.000058  
 O 0.078970 -0.338460 -0.000126  
 O -2.299297 -1.048905 -1.391376  
 O -2.299140 -1.048981 1.391388  
 O 2.432059 0.933213 -1.414465  
 O 2.889774 -1.479729 -0.000501  
 O -3.051285 1.394501 0.000132  
 O 2.432157 0.932316 1.415022

[Mo<sub>2</sub>O<sub>8</sub>]-II 1/2  
 E = -20103.47  
 Mo 1.605833 0.111874 -0.042446  
 Mo -1.465339 -0.201839 -0.007455  
 O 0.059206 0.295074 -1.121936  
 O -2.967645 0.791380 0.600291  
 O -2.080167 -1.627674 -0.708521  
 O 1.891355 1.509742 0.883115  
 O 2.909827 -0.038219 -1.149836  
 O -2.249813 1.539501 -0.433083  
 O 2.029262 -1.479415 0.889502  
 O -0.329623 -0.518072 1.302447

[Mo<sub>2</sub>O<sub>8</sub>]-II 3/4  
 E = -20102.07  
 Mo 1.581987 0.123021 -0.008777  
 Mo -1.460779 -0.186306 0.009057  
 O -0.025701 0.788672 -0.845652  
 O -2.536263 1.551036 -0.611857  
 O -2.239112 -1.324935 -0.994156  
 O 1.998267 1.081221 1.332452  
 O 2.770064 0.404977 -1.221640  
 O -2.612212 0.490316 1.220584  
 O 2.165869 -1.671382 0.184472  
 O -0.157258 -0.987661 0.934325

[Mo<sub>2</sub>O<sub>8</sub>]-III 1/2  
 E = -20102.22  
 Mo 1.692592 0.048084 0.030758  
 Mo -1.692369 0.045695 -0.033851  
 O -2.657351 1.441813 -0.120545  
 O -2.359736 -1.164927 -1.091316  
 O 2.657141 1.446839 0.006872  
 O 0.024501 0.470253 1.028685  
 O 2.359223 -1.073935 1.181006  
 O -2.201411 -0.940502 1.476071  
 O 2.200907 -1.055105 -1.376602  
 O -0.024446 0.383225 -1.066931

[Mo<sub>2</sub>O<sub>8</sub>]-III 3/4  
 E = -20102.23  
 Mo 1.721345 -0.043117 0.027285  
 Mo -1.721480 0.043315 0.027272  
 O -2.011217 -0.131366 1.692090  
 O -2.932007 1.094986 -0.621351  
 O 2.012834 0.131416 1.691812  
 O 0.120990 -1.061652 -0.292705  
 O 2.930559 -1.095467 -0.622617  
 O -2.383115 -1.453773 -0.919520  
 O 2.383797 1.453854 -0.919164  
 O -0.121130 1.060965 -0.294968

[Mo<sub>2</sub>O<sub>8</sub>]-IV 1/2  
 E = -20102.11  
 Mo 1.971052 0.030347 -0.020782  
 Mo -1.893098 -0.011255 0.064268  
 O -2.370553 -0.164820 1.690092  
 O -1.479880 1.782301 -0.420522  
 O 0.217163 0.041068 0.372421  
 O 2.813218 -1.537207 0.590069  
 O 2.825262 1.262055 0.843860  
 O -3.346289 0.005275 -0.903872  
 O 2.254264 0.173232 -1.701566  
 O -1.322441 -1.662135 -0.698781

[Mo<sub>2</sub>O<sub>8</sub>]-IV 3/4  
 E = -20102.12  
 Mo 1.965728 -0.031662 -0.020069  
 Mo -1.890301 0.011733 0.063835  
 O -1.281245 1.651626 -0.694637  
 O -1.487061 -1.787635 -0.407857  
 O 0.217083 -0.059696 0.397661  
 O 2.799039 1.545291 0.575914

O 2.228548 -0.180823 -1.703435  
O -3.330910 0.009968 -0.921082  
O 2.844085 -1.250091 0.840255  
O -2.385533 0.175984 1.683409

[Mo<sub>4</sub>O<sub>13</sub>]<sup>2-</sup> I 1/2  
E = -34071.74

Mo -1.531114 -1.092352 0.367516  
O -1.373760 -2.453099 -0.640145  
O -1.611999 -1.648076 1.972884  
O 0.000222 0.000055 0.160460  
Mo -4.952395 0.328257 -0.366341  
Mo 1.531218 1.092986 0.367121  
O 1.612611 1.648481 1.972545  
O 1.373060 2.453866 -0.640249  
O 3.052583 0.180217 -0.050771  
O -5.968625 -1.013463 0.022867  
O -5.155884 0.754040 -2.027468  
O -5.352539 1.676281 0.636150  
O -3.052418 -0.179072 -0.049531  
Mo 4.952315 -0.328781 -0.366290  
O 5.351849 -1.674594 0.639402  
O 5.155606 -0.758606 -2.026403  
O 5.969165 1.013394 0.019727

[Mo<sub>4</sub>O<sub>13</sub>]<sup>2-</sup> I 3/4  
E = -34069.16

Mo -3.027604 -0.001611 0.035629  
O -3.958498 0.005748 -1.412833  
O -3.947617 0.041652 1.490528  
O -1.684905 -1.431564 0.053035  
Mo -0.112151 2.424608 -0.051347  
Mo -0.125006 -2.413846 -0.028804  
O -0.058827 -3.251299 -1.524834  
O -0.103208 -3.561635 1.248836  
O 1.292946 -1.272931 0.133641  
O -0.123803 3.331605 -1.506556  
O 1.407465 1.375895 0.022077  
O -0.132661 3.506812 1.279004  
O -1.586746 1.339889 0.008685  
Mo 2.863218 0.055490 0.086791  
O 3.985366 0.989511 -0.851266  
O 3.460969 0.035755 1.679965  
O 3.557622 -1.448802 -0.842187

[Mo<sub>4</sub>O<sub>13</sub>]<sup>2-</sup> II 1/2  
E = -34071.68

Mo 0.123321 2.075398 -0.000181  
O -3.907042 0.001132 1.397758  
O -0.037407 3.058179 1.385851  
O -0.035537 3.059095 -1.385784  
O 2.018939 1.838804 0.001013  
Mo -2.904578 -0.000023 0.000123  
Mo 2.615942 -0.000027 0.000209  
O 3.609186 0.000302 -1.394455  
O 3.610431 -0.000024 1.394010  
O -1.777141 1.433773 -0.001906  
O 0.477979 -0.000068 -0.000228  
O -3.908520 -0.001320 -1.396453  
Mo 0.123301 -2.075380 -0.000113  
O -1.776892 -1.433677 0.000943  
O -0.036253 -3.057757 -1.386557  
O 2.019129 -1.838726 0.000523  
O -0.036300 -3.059545 1.385086

[Mo<sub>4</sub>O<sub>13</sub>]<sup>2-</sup> II 3/4  
E = -34068.34

Mo -0.010115 -2.087011 0.269107  
O 4.452664 0.141565 0.387037  
O -0.014886 -2.522571 1.918902  
O 0.243926 -3.517495 -0.630950  
O -1.857548 -1.885920 -0.164993  
Mo 2.825103 0.144471 -0.159540  
Mo -2.527355 -0.073055 -0.263804

O -3.241930 -0.081080 -1.819445  
O -3.759893 -0.161392 0.922332  
O 1.841718 -1.444533 0.061710  
O -0.429960 0.036148 0.043285  
O 2.736787 -0.437541 -2.006846  
Mo -0.203047 2.092898 0.217840  
O 1.763396 1.540698 0.299200  
O 0.098071 3.258184 -0.996770  
O -2.058064 1.803710 -0.088462  
O -0.218360 2.864390 1.741085

[Mo<sub>4</sub>O<sub>13</sub>]<sup>2-</sup> III 1/2  
E = -34071.32

Mo 0.558365 -1.123741 -0.001511  
Mo 4.141858 0.104254 0.000823  
Mo -1.552346 2.008775 -0.000407  
Mo -3.357261 -0.910425 0.001044  
O -3.149655 1.005269 0.000587  
O -1.487446 3.004305 1.386315  
O 2.236219 -0.373382 -0.001168  
O 5.093111 -1.342047 -0.000990  
O -4.200637 -1.435529 1.402332  
O -1.673651 -1.451504 -0.000681  
O -0.231076 0.762437 -0.000235  
O 4.507657 1.036096 -1.410917  
O 4.505892 1.031452 1.416065  
O -1.488401 3.003021 -1.388102  
O -4.203662 -1.436078 -1.398225  
O 0.595846 -2.110203 1.381729  
O 0.595070 -2.107864 -1.386446

[Mo<sub>4</sub>O<sub>13</sub>]<sup>2-</sup> III 3/4  
E = -34068.75

Mo -0.419519 -1.174126 -0.029976  
Mo -4.088849 0.054151 0.040499  
Mo 1.505617 2.027272 0.002155  
Mo 3.324055 -0.897845 0.010392  
O 3.121995 1.014209 0.019893  
O 1.453751 3.012946 -1.401822  
O -2.373323 -0.400780 -0.029642  
O -5.092405 -0.888119 -1.031027  
O 4.201387 -1.390414 -1.383700  
O 1.639823 -1.506108 -0.019321  
O 0.196872 0.780743 -0.011915  
O -4.696221 -0.000509 1.647349  
O -4.375756 1.782885 -0.663066  
O 1.421495 3.014042 1.404037  
O 4.159579 -1.407946 1.423621  
O -0.663224 -2.018095 -1.507795  
O -0.680815 -2.042474 1.432273

[Mo<sub>4</sub>O<sub>13</sub>]<sup>2-</sup> IV 1/2  
E = -34071.25

Mo -2.863716 -1.220833 -0.552409  
Mo -1.909780 2.012432 0.129621  
Mo 0.616624 -0.994554 0.806838  
O -3.154569 0.621174 -0.423884  
O -1.107072 -1.452820 -0.120959  
O -0.424165 1.098004 0.370486  
O -1.745290 3.200490 -1.100403  
O -2.453682 2.758729 1.579354  
O -3.891464 -2.056490 0.528514  
O -3.189168 -1.769041 -2.138537  
O 2.075840 -0.124299 0.116377  
O 4.125542 -0.192925 -2.104621  
Mo 3.941070 0.216888 -0.433488  
O 4.326963 1.885996 -0.200804  
O 5.008765 -0.753836 0.521078  
O 0.429024 -0.674096 2.462277  
O 1.132238 -2.614031 0.770671

[Mo<sub>4</sub>O<sub>13</sub>]<sup>2-</sup> IV 3/4  
E = -34068.59

Mo -2.478002 -1.365306 -0.558723

Mo -1.732311 1.931350 0.111269  
Mo 0.840283 -0.644210 0.985948  
O -2.854233 0.503990 -0.493107  
O -0.821485 -1.493914 0.118437  
O -0.177334 1.139115 0.521171  
O -1.552467 3.105008 -1.124726  
O -2.434968 2.676523 1.488541  
O -3.612571 -2.226740 0.398451  
O -2.566894 -1.933797 -2.173888  
O 2.534492 0.477098 1.118530  
O 1.754663 -0.712415 -1.077635  
Mo 3.234685 0.210728 -0.582048  
O 3.472287 1.672640 -1.466200  
O 4.698999 -0.705463 -0.619583  
O 0.446977 -0.862797 2.612215  
O 1.823097 -2.335203 0.926452

[Mo<sub>4</sub>O<sub>13</sub>]<sup>2-</sup> V 1/2  
E = -34069.00

Mo -2.008116 1.930871 -0.205344  
O 2.259474 -1.309030 0.070559  
O -2.255506 -2.267801 -1.810214  
O -2.812686 2.699089 1.108681  
O -2.702612 0.303741 -0.533443  
Mo 3.603614 -0.132349 -0.382849  
Mo -2.187142 -1.775035 -0.178251  
O -3.920920 -1.507967 0.572302  
O -2.146087 -3.234950 0.753134  
O -2.133291 2.935416 -1.598222  
O 2.495858 1.286278 0.015899  
O 4.077254 -0.208418 -2.036039  
Mo 0.936092 0.134021 0.754949  
O 4.996992 -0.235956 0.625389  
O -0.218036 1.626559 0.229309  
O -0.480165 -1.057060 0.233830  
O 1.031370 0.143175 2.429162

[Mo<sub>4</sub>O<sub>13</sub>]<sup>2-</sup> V 3/4  
E = -34069.04

Mo 2.297500 1.773702 0.144680  
O -2.015965 -1.247326 0.003486  
O 3.197850 0.106113 0.368984  
O 2.370057 2.681488 1.596883  
O 3.028692 2.670440 -1.121466  
Mo -3.586509 0.082890 0.399388  
Mo 2.472782 -1.662210 0.246557  
O 3.322304 -2.569061 -0.936897  
O 2.595209 -2.453006 1.763603  
O -3.572851 0.329547 2.093655  
O -2.179026 1.152993 -0.388657  
O -4.476442 -1.574527 0.006446  
Mo -0.782506 -0.120283 -0.817138  
O -4.977625 0.896158 -0.253416  
O 0.609301 1.301869 -0.265468  
O 0.764210 -1.389974 -0.229348  
O -0.772362 -0.293736 -2.498614

[Mo<sub>4</sub>O<sub>13</sub>]<sup>2-</sup> VI 1/2  
E = -34068.53

Mo 3.735656 0.904513 -0.119601  
Mo 1.317942 -1.018647 0.163967  
Mo -1.687659 -0.945620 -0.151975  
Mo -3.828620 0.996941 0.066307  
O 2.366454 -0.147338 1.328949  
O 2.456143 -0.005991 -1.145617  
O -2.853364 -0.004202 1.276294  
O -2.757143 0.408598 -1.312965  
O -0.090380 -0.561693 -1.141277  
O -0.257133 -1.170945 1.194936  
O 1.872053 -2.616359 -0.029732  
O -2.274896 -2.480820 -0.522675  
O -5.473990 0.501929 -0.073684  
O 4.858363 0.180704 1.249473  
O 3.232276 2.500873 0.225224  
O -3.755906 2.695224 0.337811

O 5.106595 1.029787 -1.169903

[Mo<sub>3</sub>O<sub>13</sub>]<sup>2-</sup> VI 3/4

E = -34068.53

Mo -3.732456 -0.904855 -0.118350  
O -1.317517 1.020352 0.162161  
Mo 1.686622 0.945376 -0.149877  
Mo 3.827410 -0.997477 0.065474  
O -2.379475 0.158353 1.324627  
O -2.450866 0.003713 -1.146017  
O 2.851804 -0.000411 1.277791  
O 2.756269 -0.405042 -1.312974  
O 0.090789 0.572134 -1.145806  
O 0.253678 1.156222 1.199855  
O -1.862547 2.620703 -0.033414  
O 2.275024 2.482356 -0.510635  
O 5.472673 -0.501459 -0.072339  
O -4.869478 -0.192930 1.246604  
O -3.227998 -2.500915 0.225630  
O 3.755101 -2.696624 0.331920  
O -5.101285 -1.028927 -1.172136

[Mo<sub>2</sub>O<sub>5</sub>] I 1/2

E = -13958.16

Mo -1.477639 0.229540 -0.000015  
Mo 1.219695 -0.062158 0.000080  
O -0.155346 0.333847 -1.334245  
O -0.155559 0.333723 1.334362  
O -2.623093 -0.988195 -0.000139  
O 2.469699 1.083101 -0.000179  
O 1.818506 -1.641228 -0.000138

[Mo<sub>2</sub>O<sub>5</sub>] I 3/4

E = -13958.33

Mo -1.557725 0.000076 0.000053  
Mo 1.330858 0.000096 -0.000040  
O -0.081852 -0.002438 -1.277893  
O -0.081824 0.003314 1.277821  
O -3.238368 0.000016 -0.000123  
O 2.298060 1.389095 -0.002582  
O 2.295038 -1.390891 0.002706

[MoO<sub>3</sub>] I 1/2

E = -8001.71

Mo -0.000072 -0.000001 -0.196361  
O 0.813210 -1.399526 0.343591  
O 0.805996 1.403693 0.343590  
O -1.618829 -0.004162 0.343716

[MoO<sub>3</sub>] I 3/4

E = -8000.13

Mo 0.021510 -0.000423 -0.138481  
O 0.848240 1.428497 0.249889  
O -1.836330 -0.013483 0.226409  
O 0.875161 -1.412793 0.250729

[Mo<sub>3</sub>O<sub>10</sub>] I 1/2

E = -26063.40

Mo 0.931609 1.619691 -0.014010  
O -0.967018 1.594001 0.396982  
O 2.132760 -0.000229 -0.171401  
O 1.333204 2.852127 -1.104981  
O 1.547813 2.062781 1.511642  
Mo -1.938259 0.000234 0.039934  
O -2.638441 -0.000049 -1.505672  
O 0.306425 -0.000292 -1.133608  
Mo 0.931081 -1.619968 -0.013977  
O -0.967605 -1.593582 0.397715  
O 1.547266 -2.062960 1.511704  
O -3.230079 0.001028 1.139697  
O 1.332412 -2.852599 -1.104799

[Mo<sub>3</sub>O<sub>10</sub>] I 3/4

E = -26060.69

Mo -1.769644 -0.844277 -0.015423  
O -0.000179 -1.782776 0.150295  
O -1.799621 0.993226 0.361369  
O -2.721712 -1.249687 -1.358875  
O -2.501661 -1.585854 1.330899  
Mo 1.769457 -0.844555 -0.015473  
O 2.721513 -1.250261 -1.358843  
O 0.000012 -0.059860 -1.078762  
Mo 0.000163 1.733511 -0.065379  
O 1.799865 0.992986 0.361229  
O 0.000526 2.214537 1.843192  
O 2.501232 -1.586195 1.330946  
O 0.000151 3.079317 -1.076004

[Mo<sub>3</sub>O<sub>10</sub>] II 1/2

E = -26063.34

Mo 3.244053 -0.618424 -0.000347  
O 1.524390 0.240052 -0.004548  
O -3.459011 -1.551717 -1.456622  
O 3.375754 -1.729455 -1.341380  
O 3.461116 -1.545524 1.459817  
Mo 0.000001 1.305769 -0.000080  
O 0.003950 2.306602 1.368512  
O -0.003965 2.307433 -1.368068  
O -1.524401 0.240040 0.003649  
Mo -3.244048 -0.618418 0.000434  
O -4.496124 0.547500 1.082228  
O -3.377744 -1.723792 1.345368  
O 4.496003 0.546993 -0.114993

[Mo<sub>3</sub>O<sub>10</sub>] II 3/4

E = -26060.68

Mo -2.820302 -0.800465 -0.000190  
O -1.453296 0.406371 -0.000356  
O 2.821539 -1.763224 1.417389  
O -2.825113 -1.760570 1.419024  
O -2.821470 -1.764478 -1.416566  
Mo -0.000007 1.735657 -0.000004  
O 0.000077 2.659222 -1.439857  
O -0.000548 2.658516 1.440297  
O 1.453538 0.406669 -0.000350  
Mo 2.820345 -0.800408 0.000236  
O 4.484592 0.105701 0.000792  
O 2.824945 -1.761649 -1.418267  
O -4.484450 0.105826 -0.002327

[Mo<sub>3</sub>O<sub>10</sub>] III 1/2

E = -26062.98

Mo 2.056069 -0.002180 -0.199917  
O 0.594358 1.376011 -0.129241  
O 0.592183 -1.377561 -0.119893  
O 2.746820 -0.007013 -1.733117  
O 3.168428 0.735260 1.179124  
Mo -1.187990 1.729785 0.024622  
O -1.536399 2.544286 1.479733  
O -1.748941 2.666859 -1.282573  
O -1.988342 0.001860 0.017637  
Mo -1.191598 -1.727693 0.025489  
O -1.748920 -2.661174 -1.285815  
O -1.548040 -2.544204 1.477528  
O 3.167330 -0.733859 1.183100

[Mo<sub>3</sub>O<sub>10</sub>] III 3/4

E = -26060.91

Mo 1.900555 -0.356502 -0.276535  
O 1.036165 1.353880 -0.096901  
O 0.427157 -1.481204 -0.056674  
O 2.522689 -0.498187 -1.831331  
O 3.211224 -0.013423 1.332803  
Mo -0.743414 1.978659 0.037047  
O -1.002027 2.717238 1.557795

O -1.119131 3.066147 -1.226879  
O -1.653989 0.398835 -0.119721  
Mo -1.560913 -1.564771 0.030678  
O -2.221767 -2.376757 -1.327812  
O -2.062392 -2.152993 1.562841  
O 2.981872 -1.314815 1.302134

[Mo<sub>3</sub>O<sub>10</sub>] IV 1/2

E = -26062.16

Mo 1.964624 -0.954518 0.017225  
O 1.338008 0.745483 0.156067  
O 3.136809 -1.086098 -1.210099  
O 2.619787 -1.494441 1.492681  
Mo -0.007905 2.221197 -0.000082  
O -0.176157 3.135163 1.436819  
O 0.154965 3.138746 -1.435317  
O -1.345558 0.737854 -0.159124  
Mo -1.957805 -0.967120 -0.017294  
O -2.610094 -1.513850 -1.491504  
O -3.127743 -1.106548 1.211304  
O -0.456215 -2.064678 0.562201  
O 0.471898 -2.064319 -0.562231

[Mo<sub>3</sub>O<sub>10</sub>] IV 3/4

E = -26059.89

Mo 2.374248 -0.860143 0.017093  
O 1.385225 0.775827 0.368806  
O 3.131344 -0.875397 -1.516282  
O 3.364665 -1.302634 1.339408  
Mo 0.000441 1.947039 -0.000190  
O -0.333038 2.925374 1.357653  
O 0.332115 2.928944 -1.355949  
O -1.382242 0.774131 -0.371130  
Mo -2.374441 -0.859639 -0.017465  
O -3.361409 -1.305831 -1.341146  
O -3.135405 -0.869560 1.514081  
O -0.661457 -2.122410 0.580508  
O 0.658895 -2.121545 -0.050550

[Mo<sub>2</sub>O<sub>7</sub>] I 1/2

E = -18052.53

O -2.386962 -1.513927 0.572054  
O -2.478623 0.215259 -1.592872  
Mo -1.880993 -0.010541 -0.022484  
O -2.694204 1.289842 1.041488  
O 2.386537 -1.512697 -0.575795  
O 2.480246 0.211814 1.592775  
Mo 1.881025 -0.010705 0.022497  
O 0.000008 0.128439 0.001043  
O 2.692834 1.292812 -1.038756

[Mo<sub>2</sub>O<sub>7</sub>] I 3/4

E = -18052.53

O -2.385401 -1.511142 0.580577  
O -2.480050 0.206395 -1.593448  
Mo -1.880957 -0.010732 -0.022349  
O -2.693672 1.295967 1.034400  
O 2.385504 -1.514998 -0.570423  
O 2.479462 0.216919 1.592219  
Mo 1.880918 -0.010581 0.022361  
O -0.000025 0.129848 -0.000776  
O 2.694386 1.288903 -1.042609

[Mo<sub>3</sub>O<sub>10</sub>]<sup>2-</sup> I 1/2

E = -26066.09

Mo 3.390934 -0.549755 0.000032  
O 1.519921 0.059854 0.000758  
O -3.684467 -1.503116 -1.414071  
O 3.684339 -1.502902 -1.414220  
O 3.684223 -1.506292 1.412024  
Mo -0.000051 1.104950 0.000049  
O -0.000251 2.114982 1.377924  
O -0.000145 2.113400 -1.378975



O -1.519696 0.059368 0.000646  
 Mo -3.390865 -0.549803 0.000028  
 O -4.447189 0.821326 0.001461  
 O -3.684429 -1.506037 1.412171  
 O 4.447603 0.821112 0.001707

[Mo<sub>3</sub>O<sub>10</sub>]<sup>2-</sup> I 3/4  
 E = -26062.95

Mo 3.336342 -0.676454 -0.000042  
 O 1.514242 0.100227 0.000652  
 O -3.587839 -1.557711 -1.412646  
 O 3.851042 -1.454961 -1.452963  
 O 3.851251 -1.457647 1.451415  
 Mo 0.012629 1.169710 -0.000084  
 O 0.001075 2.170497 1.387239  
 O 0.002754 2.170937 -1.387108  
 O -1.499668 0.097204 -0.001243  
 Mo -3.334375 -0.588256 -0.000015  
 O -4.452013 0.735165 -0.001520  
 O -3.587437 -1.554198 1.415081  
 O 3.829964 1.249233 0.001832

[Mo<sub>3</sub>O<sub>10</sub>]<sup>2-</sup> II 1/2

E = -26064.83  
 Mo -1.699092 -0.695099 -0.014163  
 O -0.271951 -1.999205 0.280546  
 O -1.595561 1.235190 0.280654  
 O -2.733689 -1.118345 -1.316436  
 O -2.560850 -1.047988 1.437702  
 Mo 1.451587 -1.123736 -0.014163  
 O 2.335430 -1.808010 -1.316482  
 O 0.000024 0.000158 -0.982978  
 Mo 0.247501 1.818840 -0.014182  
 O 1.867553 0.764126 0.280738  
 O 0.372839 2.741176 1.437963  
 O 2.187936 -1.693884 1.437665  
 O 0.398294 2.926755 -1.316201

[Mo<sub>3</sub>O<sub>10</sub>]<sup>2-</sup> III 3/4

E = -26062.40  
 Mo -1.626361 -0.878518 -0.015153  
 O -0.000111 -1.897810 0.316871  
 O -1.781593 1.002041 0.339433  
 O -2.509416 -1.389281 -1.394804  
 O -2.516055 -1.466524 1.338453  
 Mo 1.626222 -0.878747 -0.015186  
 O 2.509153 -1.389655 -1.394861  
 O -0.000013 0.094308 -1.068581  
 Mo 0.000117 1.780014 -0.085262  
 O 1.781706 1.001841 0.339388  
 O 0.000350 2.217377 1.866911  
 O 2.515932 -1.466782 1.338396  
 O 0.000164 3.175052 -1.074301

[Mo<sub>3</sub>O<sub>10</sub>]<sup>2-</sup> III 1/2

E = -26061.09  
 Mo 1.806403 -0.765869 0.017742  
 O 1.786234 1.105743 0.166118  
 O 2.886789 -1.064889 -1.290016  
 O 2.436853 -1.307058 1.522262  
 Mo -0.002891 1.817408 -0.000079  
 O -0.135724 2.737835 1.454080  
 O 0.127739 2.740950 -1.452646  
 O -1.790012 1.101503 -0.167292  
 Mo -1.804100 -0.770246 -0.017820  
 O -2.433946 -1.313838 -1.521752  
 O -2.881906 -1.072155 1.291378  
 O -0.539448 -2.202942 0.476408  
 O 0.546508 -2.201943 -0.477716

[Mo<sub>3</sub>O<sub>10</sub>]<sup>2-</sup> III 3/4

E = -26063.05  
 Mo 2.099150 0.205630 0.069601

O 0.513068 1.220592 0.068264  
 O 3.195818 1.355219 -0.680424  
 O 2.673516 -0.009046 1.666591  
 Mo -1.355163 1.726215 -0.022987  
 O -1.880570 2.572807 1.389937  
 O -1.776969 2.477075 -1.521758  
 O -1.894682 -0.184386 0.009048  
 Mo -1.028249 -1.831815 -0.000430  
 O -1.438884 -2.699713 -1.436732  
 O -1.515677 -2.765426 1.368945  
 O 0.734968 -1.486026 0.058858  
 O 2.881792 -1.006252 -1.165195

[Mo<sub>3</sub>O<sub>10</sub>]<sup>2-</sup> IV 1/2

E = -26061.96  
 Mo 2.085181 -0.000090 -0.207604  
 O 0.554939 1.275809 -0.136631  
 O 0.555222 -1.275925 -0.134556  
 O 2.735123 -0.000915 -1.780280  
 O 3.215007 0.737589 1.208761  
 Mo -1.201191 1.705644 0.026531  
 O -1.523728 2.487760 1.534275  
 O -1.728604 2.656636 -1.317349  
 O -2.106415 0.000285 0.010526  
 Mo -1.201086 -1.705760 0.026734  
 O -1.727382 -2.656404 -1.317794  
 O -1.524781 -2.487946 1.534159  
 O 3.215374 -0.735804 1.209173

[Mo<sub>3</sub>O<sub>10</sub>]<sup>2-</sup> IV 3/4

E = -26061.82  
 Mo 1.990355 -0.314602 -0.210072  
 O 0.887414 1.372465 -0.217577  
 O 0.413263 -1.425956 0.016482  
 O 2.638660 -0.566142 -1.763768  
 O 3.025200 -1.155371 1.211814  
 Mo -0.835640 1.936629 0.027798  
 O -0.995130 2.871062 1.471105  
 O -1.371459 2.868027 -1.324761  
 O -1.776272 0.370363 0.165829  
 Mo -1.522579 -1.609976 0.045082  
 O -2.121366 -2.248109 -1.450395  
 O -2.026813 -2.451812 1.474336  
 O 3.257792 0.302209 1.137192

[Mo<sub>3</sub>O<sub>9</sub>] I 1/2

E = -24013.84  
 Mo 1.684567 1.148680 -0.000070  
 O 1.541583 -0.742259 -0.000862  
 O -0.128028 1.706053 -0.000200  
 O 2.503727 1.707069 1.358646  
 O 2.504609 1.708147 -1.357800  
 Mo 0.152529 -2.033172 -0.000079  
 O 0.226751 -3.023434 -1.357556  
 O 0.226798 -3.021338 1.358921  
 O -1.413627 -0.963967 -0.000775  
 Mo -1.837091 0.884495 -0.000028  
 O -2.730607 1.314575 1.358503  
 O -2.731237 1.315142 -1.357945

[Mo<sub>3</sub>O<sub>9</sub>] I 3/4

E = -24010.88  
 Mo 1.040168 1.740671 -0.010076  
 O 1.808582 0.006476 -0.006118  
 O -0.812261 1.378561 -0.082024  
 O 1.441942 2.596068 1.386035  
 O 1.528897 2.639625 -1.350398  
 Mo 1.053231 -1.733500 -0.009677  
 O 1.545357 -2.626971 -1.352400  
 O 1.464268 -2.587844 1.384385  
 O -0.801405 -1.383027 -0.078332  
 Mo -2.113340 -0.007306 0.030981  
 O -2.843363 -0.008926 1.540681  
 O -3.227329 -0.013252 -1.500778

[Mo<sub>3</sub>O<sub>9</sub>] II 1/2

E = -24012.57  
 Mo -0.000005 -0.731127 -0.000335  
 Mo -2.699817 0.373422 0.000067  
 O -1.361674 -0.155410 1.242263  
 O -1.363530 -0.159304 -1.242516  
 O 0.001003 -2.396658 0.000754  
 O -3.083203 2.015946 -0.002127  
 O -4.114333 -0.544548 0.002599  
 O 1.361561 -0.155830 -1.242536  
 O 1.362570 -0.156607 1.242348  
 Mo 2.699637 0.373698 0.000022  
 O 4.112320 -0.547057 -0.000424  
 O 3.086251 2.015504 0.000930

[Mo<sub>3</sub>O<sub>9</sub>] II 3/4

E = -24010.41  
 Mo -0.045083 -0.775083 -0.000040  
 Mo -2.674879 0.391602 -0.000008  
 O -1.362011 -0.109779 1.275766  
 O -1.362305 -0.110524 -1.275883  
 O -0.036202 -2.433499 0.000357  
 O -3.069287 2.037758 -0.000428  
 O -4.085011 -0.542799 0.000479  
 O 1.490873 -0.063303 -1.301827  
 O 1.490856 -0.062601 1.301860  
 Mo 2.645478 0.342606 -0.000046  
 O 4.070578 -0.592459 0.000105  
 O 3.253553 2.091797 0.000060

[Mo<sub>2</sub>O<sub>7</sub>]<sup>2-</sup> I 1/2

E = -18059.79  
 Mo -1.910556 -0.000009 -0.000005  
 Mo 1.910556 0.000004 -0.000010  
 O 0.000002 -0.000067 0.000022  
 O 2.503478 1.633053 -0.108827  
 O 2.503535 -0.722241 1.468673  
 O -2.503570 -1.632901 0.110634  
 O -2.503516 0.912287 1.358811  
 O 2.503674 -0.910753 -1.359797  
 O -2.503602 0.720650 -1.469442

[Mo<sub>2</sub>O<sub>7</sub>]<sup>2-</sup> I 3/4

E = -18056.45  
 Mo -1.871176 -0.107663 0.000003  
 Mo 1.953175 0.019484 -0.000002  
 O 0.039674 0.026878 0.000047  
 O 2.556578 1.652215 -0.000866  
 O 2.536606 -0.801810 1.420483  
 O -2.567831 -1.692327 0.000043  
 O -2.765955 1.040671 1.152663  
 O 2.536513 -0.803264 -1.419685  
 O -2.766078 1.040577 -1.152690

[Mo<sub>2</sub>O<sub>7</sub>]<sup>2-</sup> I 5/6

E = -18053.48  
 Mo -1.904326 0.199832 0.046189  
 Mo 1.935768 -0.014640 0.016410  
 O 0.047037 0.090715 0.032232  
 O 2.455192 -1.569871 0.612056  
 O 2.536210 0.212793 -1.608003  
 O -2.588907 1.743904 -0.338186  
 O -2.121125 -1.596733 -0.948048  
 O 2.590943 1.240129 1.041108  
 O -3.084418 -1.093191 0.880197

[Mo<sub>2</sub>O<sub>7</sub>]<sup>2-</sup> I 7/8

E = -18050.13  
 Mo -1.889394 0.160408 0.053593  
 Mo 1.989463 -0.060644 0.039226  
 O 0.058598 -0.006964 -0.027136

|   |           |           |           |
|---|-----------|-----------|-----------|
| O | 2.695718  | -0.010565 | 1.635145  |
| O | 2.775824  | -1.144058 | -1.081241 |
| O | -2.614716 | 1.701129  | -0.273592 |
| O | -2.115072 | -1.636711 | -0.951244 |
| O | 1.675846  | 1.739522  | -0.722140 |
| O | -3.001562 | -1.166116 | 0.932907  |

[MoO<sub>3</sub>] 1/2

E = -8004.93

|    |           |           |           |
|----|-----------|-----------|-----------|
| Mo | 0.000055  | -0.000010 | -0.123755 |
| O  | -1.054359 | -1.346055 | 0.216553  |
| O  | 1.692946  | -0.239827 | 0.216611  |
| O  | -0.638875 | 1.585932  | 0.216551  |

[MoO<sub>3</sub>] 3/4

E = -8002.00

|    |           |           |           |
|----|-----------|-----------|-----------|
| Mo | 0.060361  | 0.000113  | 0.000178  |
| O  | 0.816070  | 1.577822  | -0.000338 |
| O  | -1.973516 | -0.013891 | -0.000255 |
| O  | 0.840550  | -1.564526 | -0.000339 |

[Mo<sub>2</sub>O<sub>6</sub>]<sup>2-</sup> 1/2

E = -16009.46

|    |           |           |           |
|----|-----------|-----------|-----------|
| Mo | -1.318334 | 0.000025  | -0.000007 |
| Mo | 1.318373  | 0.000001  | 0.000008  |
| O  | -0.000025 | 0.000057  | -1.455472 |
| O  | -0.000042 | -0.000015 | 1.455474  |
| O  | -2.234159 | -1.494388 | -0.000007 |
| O  | -2.233870 | 1.494602  | 0.000023  |
| O  | 2.234309  | 1.494374  | 0.000010  |
| O  | 2.233584  | -1.494765 | -0.000030 |

[Mo<sub>2</sub>O<sub>6</sub>]<sup>2-</sup> 3/4

E = -16009.15

|    |           |           |           |
|----|-----------|-----------|-----------|
| Mo | -1.534406 | -0.000067 | -0.000005 |
| Mo | 1.534402  | -0.000054 | 0.000005  |
| O  | 0.000010  | -0.000352 | -1.228029 |
| O  | -0.000023 | -0.000977 | 1.228029  |
| O  | -2.461322 | -1.486055 | -0.000122 |
| O  | -2.460399 | 1.486499  | 0.000130  |
| O  | 2.459494  | 1.487015  | 0.000129  |
| O  | 2.462265  | -1.485498 | -0.000136 |
